# Supplementary material for: Efficacy of adaptive e-learning for health professionals and students: a systematic review and meta-analysis
Source: PubMed Central journal article supplement — BMJ Open. 2019 Aug 28;9(8):e025252. doi: 10.1136/bmjopen-2018-025252 (PMC6719835; doi:10.1136/bmjopen-2018-025252), 2019-08-28
Supplement: bmjopen-2018-025252.draft_revisions.pdf [file bmjopen-2018-025252.draft_revisions.pdf]

# BMJ Open

BMJ Open is committed to open peer review. As part of this commitment we make the peer review history of every article we publish publicly available.

When an article is published we post the peer reviewers' comments and the authors' responses online. We also post the versions of the paper that were used during peer review. These are the versions that the peer review comments apply to.

The versions of the paper that follow are the versions that were submitted during the peer review process. They are not the versions of record or the final published versions. They should not be cited or distributed as the published version of this manuscript.

BMJ Open is an open access journal and the full, final, typeset and author-corrected version of record of the manuscript is available on our site with no access controls, subscription charges or pay-per-view fees (<http://bmjopen.bmj.com>).

If you have any questions on BMJ Open's open peer review process please email [info.bmjopen@bmj.com](mailto:info.bmjopen@bmj.com)

# BMJ Open

## Adaptive e-learning environments for health professionals and students: a systematic review and meta-analysis

|                               |                                                                                                                                                                                                                                                                                                                                                                                                                                                                                                                                                                                                                                                                                                                                                                                                                                                                                                                                                                                                                                                 |
|-------------------------------|-------------------------------------------------------------------------------------------------------------------------------------------------------------------------------------------------------------------------------------------------------------------------------------------------------------------------------------------------------------------------------------------------------------------------------------------------------------------------------------------------------------------------------------------------------------------------------------------------------------------------------------------------------------------------------------------------------------------------------------------------------------------------------------------------------------------------------------------------------------------------------------------------------------------------------------------------------------------------------------------------------------------------------------------------|
| Journal:                      | <i>BMJ Open</i>                                                                                                                                                                                                                                                                                                                                                                                                                                                                                                                                                                                                                                                                                                                                                                                                                                                                                                                                                                                                                                 |
| Manuscript ID                 | bmjopen-2018-025252                                                                                                                                                                                                                                                                                                                                                                                                                                                                                                                                                                                                                                                                                                                                                                                                                                                                                                                                                                                                                             |
| Article Type:                 | Research                                                                                                                                                                                                                                                                                                                                                                                                                                                                                                                                                                                                                                                                                                                                                                                                                                                                                                                                                                                                                                        |
| Date Submitted by the Author: | 06-Jul-2018                                                                                                                                                                                                                                                                                                                                                                                                                                                                                                                                                                                                                                                                                                                                                                                                                                                                                                                                                                                                                                     |
| Complete List of Authors:     | Fontaine, Guillaume; University of Montreal, Faculty of Nursing; Montreal Heart Institute, Research Center<br>Cossette, Sylvie ; University of Montreal, Faculty of Nursing; Montreal Heart Institute, Research Center<br>Maheu-Cadotte, Marc-André; University of Montreal, Faculty of Nursing; Montreal Heart Institute, Research Center<br>Mailhot, Tanya; University of Montreal , Faculty of Medicine & Faculty of Nursing; Montreal Heart Institute, Research Center<br>Deschênes, Marie-France; University of Montreal, Faculty of Nursing; Center for Innovation in Nursing Education<br>Mathieu-Dupuis, Gabrielle; University of Montreal, School of Librarianship and Information Science<br>Côté, José; University of Montreal, Faculty of Nursing; University of Montreal Hospital Center, Research Center<br>Gagnon, Marie-Pierre; University of Laval, Faculty of Nursing; CHU de Québec, Research Center<br>Dubé, Veronique; University of Montreal, Faculty of Nursing; University of Montreal Hospital Center, Research Center |
| Keywords:                     | MEDICAL EDUCATION & TRAINING, COMPUTER-ASSISTED INSTRUCTION, ADAPTIVE E-LEARNING ENVIRONMENTS, META-ANALYSIS, SYSTEMATIC REVIEW                                                                                                                                                                                                                                                                                                                                                                                                                                                                                                                                                                                                                                                                                                                                                                                                                                                                                                                 |
|                               |                                                                                                                                                                                                                                                                                                                                                                                                                                                                                                                                                                                                                                                                                                                                                                                                                                                                                                                                                                                                                                                 |

SCHOLARONE™  
Manuscripts

# 1 **Adaptive e-learning environments for health professionals** 2 **and students: a systematic review and meta-analysis**

3  
4 **Guillaume Fontaine**<sup>a, b\*</sup>, **Sylvie Cossette**<sup>a, b</sup>, **Marc-André Maheu-Cadotte**<sup>a, b, c</sup>,  
5 **Tanya Mailhot**<sup>a, b, d</sup>, **Marie-France Deschênes**<sup>a, e</sup>, **Gabrielle Mathieu-Dupuis**<sup>f</sup>, **José Côté**<sup>a, c</sup>,  
6 **Marie-Pierre Gagnon**<sup>g, h</sup>, **Véronique Dubé**<sup>a, c</sup>

7  
8 <sup>a</sup> Faculty of Nursing, Université de Montréal, Montréal, Québec, Canada

9 <sup>b</sup> Montreal Heart Institute Research Center, Montréal, Québec, Canada

10 <sup>c</sup> Centre Hospitalier de l'Université de Montréal Research Center, Montréal, Québec, Canada

11 <sup>d</sup> Faculty of Medicine, Université de Montréal, Montréal, Québec, Canada

12 <sup>e</sup> Center for Innovation in Nursing Education, Montréal, Québec, Canada

13 <sup>f</sup> School of Librarianship and Information Science, Université de Montréal, Montreal, QC, Canada

14 <sup>g</sup> Faculty of Nursing, Université Laval, Québec, Québec, Canada

15 <sup>h</sup> CHU de Québec Research Center, Québec, Québec, Canada

16  
17 \* Corresponding author: Montreal Heart Institute Research Center, 5000 Belanger Street, H1T  
18 1C8, Room S-2490, Montreal, QC, Canada. Tel: 1-514-376-3330, x3069. E-mail:  
19 [guillaume.fontaine@umontreal.ca](mailto:guillaume.fontaine@umontreal.ca)

20  
21 Word count (excluding title page, abstract, references, figures, and tables): 5,620 words

22

## 23 **COPYRIGHT**

24           The Corresponding Author has the right to grant on behalf of all authors and does grant on  
25 behalf of all authors, a worldwide license to the Publishers and its licensees in perpetuity, in all  
26 forms, formats and media (whether known now or created in the future), to i) publish, reproduce,  
27 distribute, display and store the Contribution, ii) translate the Contribution into other languages,  
28 create adaptations, reprints, include within collections and create summaries, extracts and/or,  
29 abstracts of the Contribution, iii) create any other derivative work(s) based on the Contribution,  
30 iv) to exploit all subsidiary rights in the Contribution, v) the inclusion of electronic links from the  
31 Contribution to third party material where-ever it may be located; and, vi) license any third party  
32 to do any or all of the above.

## 33 **TRANSPARENCY DECLARATION**

34           The lead author (the manuscript's guarantor) affirms that the manuscript is an honest,  
35 accurate, and transparent account of the study being reported; that no important aspects of the  
36 study have been omitted; and that any discrepancies from the study as planned (and, if relevant,  
37 registered) have been explained.

1  
2  
3 38 **ABSTRACT (300 WORDS)**  
4  
5

6 39 **Objective:** To systematically identify, appraise, and synthesize the evidence regarding the  
7  
8  
9 40 effectiveness of adaptive e-learning environments (AEEs) in improving knowledge, competence,  
10  
11 41 and clinical behavior in health professionals and students.  
12

13  
14 42 **Design:** Systematic review and meta-analysis.  
15

16  
17 43 **Methods:** A search for studies published between January 2005 and April 2017 was performed in  
18  
19 44 CINAHL, EMBASE, ERIC, PsycINFO, PubMed and Web of Science. Studies were eligible if  
20  
21 45 they were controlled, and evaluated the effect of an AEE on knowledge, competence or clinical  
22  
23 46 behavior in health professionals or students. AEEs were reviewed with regard to their clinical  
24  
25 47 topic, theoretical framework, and adaptation process. Studies were included in the meta-analysis  
26  
27 48 if they were randomized, and had a non-AEE control group. Effect sizes (ES) were pooled using  
28  
29 49 a random effects model. Two authors screened studies, extracted data, assessed risk of bias, and  
30  
31 50 coded quality of evidence independently.  
32  
33  
34  
35

36 51 **Results:** From a pool of 5,580 articles, we included 17 eligible studies enrolling 333 health  
37  
38 52 professionals and 628 students. Risk of bias was generally high due to issues related to allocation  
39  
40 53 concealment, similarity of baseline characteristics, blinding, and outcome data. Clinical topics  
41  
42 54 were mostly related to diagnostic testing, theoretical frameworks were heterogeneous, and the  
43  
44 55 adaptation process was characterized by 4 subdomains: goals, targeted variables, techniques, and  
45  
46 56 timing. The pooled ES was 1.04 for knowledge (95% CI, -0.86-2.94; *P* .28), and 1.55 for  
47  
48 57 competence (95% CI, 0.50-2.60; *P* .004). Statistical heterogeneity was high in all analyses.  
49  
50  
51  
52

53 58 **Conclusions:** AEEs may improve only competence, not knowledge, in health professionals and  
54  
55 59 students. The adaptation process within AEEs may be more beneficial more learning  
56  
57  
58  
59  
60

1  
2  
3 60 competencies since they are complex in nature, rather than learning knowledge, which generates  
4  
5 61 less cognitive load. Future research should report more clearly on the design and adaptation  
6  
7 62 process of AEEs, and target higher-level outcomes, such as clinical behavior.  
8  
9

10  
11 63 **PROSPERO registration number:** CRD42017065585  
12

13  
14 64 **Keywords:** Computer-assisted instruction; medical education; nursing education; e-learning,  
15  
16 65 meta-analysis  
17  
18  
19  
20  
21  
22  
23  
24  
25  
26  
27  
28  
29  
30  
31  
32  
33  
34  
35  
36  
37  
38  
39  
40  
41  
42  
43  
44  
45  
46  
47  
48  
49  
50  
51  
52  
53  
54  
55  
56  
57  
58  
59  
60

For peer review only

## 66 ARTICLE SUMMARY

### 67 Strengths and Limitations of the Study

- 68 • To our knowledge, this is the first systematic review and meta-analysis examining the  
69 effectiveness of adaptive e-learning environments in improving knowledge, competence,  
70 and clinical behavior in health professionals and students.
- 71 • Strengths of this review include the broad search strategy, and in-depth assessments of the  
72 risk of bias and the quality of evidence.
- 73 • High statistical heterogeneity resulting from clinical and methodological diversity limits  
74 the interpretation of findings.
- 75 • Quantitative results should be treated with caution, given the small number and risk of  
76 bias of studies included in the meta-analysis.

## 77 INTRODUCTION

78 The use of information and communication technologies (ICTs) in the education of health  
79 professionals and students has become ubiquitous. Indeed, e-learning, defined as the use of ICTs  
80 to access educational curriculum and support learning<sup>1</sup>, is increasingly present in clinical settings  
81 for the continuing education of health professionals<sup>2,3</sup>, and in academic settings for the education  
82 of health professions students<sup>4</sup>. The interaction of health professionals and students with e-  
83 learning environments during the learning process generates a significant amount of data<sup>5</sup>.  
84 However, designers of e-learning environments and educators rarely make use of this data to  
85 optimize learning effectiveness and efficiency. Thus, in recent years, educational researchers  
86 have strived to develop e-learning environments that take a data-driven and personalized  
87 approach to education<sup>6-9</sup>. E-learning environments that take into account each user's interactions  
88 and performance level could anticipate what types of content and resources meet the user's needs,  
89 potentially increasing learning effectiveness and efficiency<sup>9</sup>.

90 E-learning environments integrate information, in the form of text and multimedia (e.g.,  
91 illustrations, animations, videos). They can include both asynchronous (i.e., designed for self-  
92 study) and synchronous (i.e., a class taught by an educator in real time) components<sup>1</sup>. E-learning  
93 environments can be either *nonadaptive*, *adaptive*, or *intelligent*<sup>10</sup> (see **Figure 1**). In the fields of  
94 computer science and educational technology, the term *adaptation* refers to the process executed  
95 by a system based on ICTs of adapting educational curriculum content, structure or delivery to  
96 the profile of a user<sup>10</sup>.

97 Nonadaptive e-learning environments (**Type A**) provide a standardized training for all users.  
98 While they can include instructional design variations (e.g., interactivity, feedback, practice



1  
2  
3 99 exercises), they *do not* consider users' characteristics to provide a personalized training. They are  
4  
5 100 generally considered to be as effective as non-e-learning educational interventions, such as large-  
6  
7 101 group classroom instruction and printed text, in improving learning outcomes<sup>11 12</sup>. Adaptive e-  
8  
9  
10 102 learning environments (AEEs; **Type B1**) collect data to build each user's profile (e.g., navigation  
11  
12 103 behavior, preferences, knowledge), and use simple techniques (e.g., adaptive information  
13  
14 104 filtering, adaptive hypermedia) to adapt the content, navigation, presentation, multimedia, or  
15  
16 105 strategies to provide personalized training<sup>7 8</sup>. Intelligent e-learning environments (IEEs; **Type**  
17  
18 106 **B2**) are a subtype of AEEs that use advanced adaptation techniques and user-modelling  
19  
20 107 techniques derived from artificial intelligence (e.g., machine learning, rule-based systems, natural  
21  
22 108 language processing) to provide a more personalized training for each user<sup>6 13-16</sup>. In the context of  
23  
24 109 this review, our use of the term "AEEs" includes IEEs.  
25  
26  
27  
28

29 110 In recent years, AEEs have been developed and evaluated primarily in academic settings for  
30  
31 111 students in mathematics, physics and related disciplines, for the acquisition of knowledge and  
32  
33 112 development of cognitive skills (e.g., arithmetic calculation). Four meta-analyses reported on the  
34  
35 113 effectiveness of AEEs among high school and university students in in these fields of study<sup>13-15</sup>  
36  
37 114 <sup>17</sup>. The results are promising: AEEs are in almost all cases more effective than large-group  
38  
39 115 classroom instruction. In addition, Nesbit, et al.<sup>18</sup> point out that AEEs are more effective than  
40  
41 116 nonadaptive e-learning environments.  
42  
43  
44  
45

46 117 The variability in the degree and the complexity of adaptation within AEEs mirrors the  
47  
48 118 adaptation that can be observed in non-e-learning educational interventions (**Type C**). Some  
49  
50 119 interventions, like one-on-one human instruction and small-group classroom instruction,  
51  
52 120 generally have a high degree of adaptation since the instructor can adapt his teaching to the  
53  
54 121 individual profiles of learners and consider their feedback<sup>19</sup>. Other interventions, like large-  
55  
56  
57  
58  
59  
60

1  
2  
3 122 group classroom instruction, generally have a low degree of adaptation to individual learners. In  
4  
5 123 some interventions, like paper-based instruction (e.g., handouts, textbooks), there is no adaptation  
6  
7  
8 124 at all.

9  
10  
11 125 Despite evidence of the effectiveness of AEEs for knowledge acquisition and skill development  
12  
13 126 in areas such as mathematics in high school and university students, their effectiveness in  
14  
15 127 improving learning outcomes in health professionals and students has not yet been established.  
16  
17  
18 128 To address this need, we conducted a systematic review and meta-analysis to identify and  
19  
20 129 quantitatively synthesize all comparative studies of AEEs involving health professionals and  
21  
22 130 students.

### 23 24 25 131 **Systematic Review and Meta-Analysis Objective**

26  
27  
28 132 To systematically identify, appraise, and synthesize the best available evidence regarding the use  
29  
30  
31 133 and the effectiveness of AEEs in improving knowledge, competence, and clinical behavior in  
32  
33 134 health professionals and students.

### 34 35 36 135 **Systematic Review and Meta-Analysis Questions**

37  
38  
39 136 We sought to answer the following questions with the systematic review:

- 40  
41  
42  
43 137 1. What are the characteristics of studies assessing an AEE designed for health  
44  
45 138 professionals' and students' education?  
46  
47 139 2. What are the characteristics of AEEs designed for health professionals' or students'  
48  
49 140 education?

50  
51  
52  
53 141 We sought to answer the following question with the meta-analysis:  
54  
55  
56  
57  
58  
59  
60

- 1  
2  
3 142 3. What is the effectiveness of AEEs in improving knowledge, competence, and clinical  
4  
5 143 behavior in health professionals and students in comparison with nonadaptive e-learning  
6  
7 144 environments, and non–e-learning educational interventions?  
8  
9

## 10 11 145 **METHODS**

12  
13  
14 146 We planned and conducted this systematic review following the Effective Practice and  
15  
16 147 Organization of Care (EPOC) Cochrane Group guidelines<sup>20</sup>, and reported it according to the  
17  
18 148 Preferred Reporting Items for Systematic review and Meta-Analysis (PRISMA) standards<sup>21</sup> (see  
19  
20  
21 149 **Supplementary File 1**). We prospectively registered (International Prospective Register of  
22  
23 150 Systematic Reviews #CRD42017065585) and published the protocol of this systematic review<sup>22</sup>  
24  
25 151 <sup>23</sup>. Thus, in this paper, we present an abridged version of the methods with an emphasis on  
26  
27  
28 152 changes made to the methods since the publication of the protocol.  
29  
30

### 31 153 **Study Eligibility**

32  
33  
34 154 We included primary research articles that assessed an AEE with licensed health professionals,  
35  
36 155 students, trainees, and residents in any discipline. We defined an AEE as a computer-based  
37  
38 156 learning environment which collects data to build each user's profile (e.g., navigation behavior,  
39  
40 157 individual objectives, knowledge), interprets these data through algorithms, and adapts in real-  
41  
42 158 time the content (e.g., showing/hiding information), navigation (e.g., specific links and paths),  
43  
44 159 presentation (e.g., page layout), multimedia presentation (e.g., images, videos), or tools (e.g.,  
45  
46 160 different set of strategies for different types of users) to provide a dynamic and evolutionary  
47  
48 161 learning path for each user<sup>6 10</sup>. We used the definitions of each type of adaptation proposed by  
49  
50  
51 162 Knutov and colleagues<sup>8</sup>. We included AEEs with variable levels of technological complexity,  
52  
53  
54 163 ranging from simple adaptive functionality (**Type B1**) to the use of artificial intelligence (IEEs,  
55  
56  
57  
58  
59  
60

1  
2  
3 164 **Type B2**). We considered for inclusion primary research articles in which the comparator was: 1)  
4  
5 165 a nonadaptive e-learning environment; 2) a non-e-learning educational intervention; 3) another  
6  
7 166 AEE with design variations. While included in the qualitative synthesis of the evidence for  
8  
9 167 descriptive purposes, the third comparator was excluded from the meta-analysis. Outcomes of  
10  
11 168 interest were knowledge, competence (including skills), and clinical behavior<sup>24 25</sup>. Finally, in  
12  
13 169 terms of study design, we considered for inclusion all controlled, quantitative studies in  
14  
15 170 accordance with the EPOC Cochrane Review Group guidelines<sup>26</sup>.  
16  
17  
18  
19

## 20 171 **Study Identification**

21  
22  
23 172 We previously published our search strategy<sup>22</sup>. Briefly, we designed a strategy in consultation  
24  
25 173 with a librarian to search CINAHL, EMBASE, ERIC, PsycINFO, PubMed and Web of Science  
26  
27 174 for primary research articles published between January 2005 and April 2017. We limited our  
28  
29 175 search to articles published after 2005 since earlier studies seem to have a bias toward more  
30  
31 176 positive results<sup>15</sup>, which could be explained by the effect of the novelty of e-learning on student  
32  
33 177 motivation and learning outcomes. The search strategy revolved around 3 key concepts:  
34  
35 178 “adaptive e-learning environments”, “health professionals/students”, and “effects on  
36  
37 179 knowledge/competence/behavior” (see **Supplementary file 2**). To identify additional articles, we  
38  
39 180 hand-searched 6 key journals (e.g., *British Journal of Educational Technology*, *Computers and*  
40  
41 181 *Education*) and the reference lists of included primary research articles. We sought relevant  
42  
43 182 articles published in English or French.  
44  
45  
46  
47  
48

## 49 183 **Study Selection**

50  
51  
52 184 We worked independently and in duplicate (G.F. and M.-A.M.-C./T.M.) to screen all titles and  
53  
54 185 abstracts for inclusion using the EndNote software V8.0 (Clarivate Analytics). We resolved  
55  
56  
57  
58  
59  
60

186 disagreements by consensus. We then performed the full-text assessment of potentially eligible  
187 articles using the same methodology.

## 188 **Data Extraction**

189 One review author (G.F.) extracted data from included primary research articles using a modified  
190 version of the data collection form developed by the EPOC Cochrane Review Group<sup>27</sup>. The main  
191 changes made to the extraction form were the addition of specific items relating to the AEE  
192 assessed in each study (e.g., adaptation techniques, duration of each training session). Two  
193 review authors (T.M., M.-F.D.) validated the data extraction forms. For all studies, we extracted  
194 the following data items if possible:

- 195 • *the population and setting*: study setting, study population, inclusion criteria, exclusion  
196 criteria;
- 197 • *the methods*: study aim, study design, unit of allocation, study start date and end date, and  
198 duration of participation;
- 199 • *the participants*: study sample, withdrawals and exclusions, age, sex, level of instruction,  
200 number of years of experience as a health professional, practice setting, and previous  
201 experience using e-learning;
- 202 • *the interventions*: name of intervention, theoretical framework, statistical model/algorithm  
203 used to generate the learning path, clinical topic, number of training sessions, duration of  
204 each training session, total duration of the training, adaptation techniques within the AEE  
205 (content, navigation, presentation, multimedia, tools), mode of delivery, presence of other  
206 educational interventions and strategies;

- 1  
2  
3 207 • *the outcomes*: name, time-points measured, definition, person measuring, unit of  
4  
5 208 measurement, scales, validation of measurement tool;  
6  
7  
8 209 • *the results*: results according to our primary (knowledge) and secondary (competence,  
9  
10 210 behavior) outcomes, comparison, time-point, baseline data, statistical methods used, and  
11  
12 211 key conclusions.

13  
14  
15 212 We contacted all of the corresponding authors (N=12) of the 17 included primary research  
16  
17 213 articles to validate the completed data extraction forms, and to provide us with missing data.

### 21 214 **Assessment of the Risk of Bias**

22  
23  
24 215 We worked independently and in duplicate (G.F. and T.M./M.-F.D.) to assess the risk of bias of  
25  
26 216 included primary research articles using the EPOC risk of bias criteria, based upon the data  
27  
28 217 extracted with the data collection form<sup>27</sup>. A study was deemed at high risk of bias if the  
29  
30 218 individual criterion “random sequence generation” was scored at “high” or at “unclear” risk of  
31  
32 219 bias.

### 33 34 35 36 220 **Data Synthesis**

37  
38  
39 221 First, we synthesized data qualitatively using tables to provide an overview of the included  
40  
41 222 studies, and of the AEEs reported in these studies.

42  
43  
44  
45 223 Second, using the Review Manager (RevMan) software V5.1, we first conducted a meta-analysis  
46  
47 224 to quantitatively synthesize the effectiveness of AEEs versus other educational interventions in  
48  
49 225 improving all learning outcomes. We included studies in the meta-analysis if the comparator  
50  
51 226 wasn't another AEE, if they were randomized, and if they reported outcome data. We then  
52  
53 227 conducted meta-analyses with the same comparison for each outcome for which data from at

1  
2  
3 228 least 2 studies were available (i.e., knowledge, competence). For randomized controlled trials  
4  
5 229 (RCTs), we converted each post-test mean and standard deviation (SD) to a standardized mean  
6  
7 230 difference ([SMD], also known as Hedges g effect size [ES]). For crossover RCTs, we used  
8  
9  
10 231 means pooled across each intervention. We pooled effect sizes using a random effects model.  
11  
12 232 Statistical significance was defined by a two-sided alpha of .05.  
13  
14

15 233 We first assessed heterogeneity qualitatively by examining the characteristics of included studies,  
16  
17 234 the similarities and disparities between the types of participants, the types of interventions, and  
18  
19  
20 235 the types of outcomes. We then used the  $I^2$  statistic within the RevMan software to quantify how  
21  
22 236 much the results varied across individual studies (i.e., between-study inconsistency, or  
23  
24 237 heterogeneity). We interpreted the  $I^2$  values as follows: 0%-40%: might not be important; 30%-  
25  
26 238 60%: may represent moderate heterogeneity; 50%-90%: may represent substantial heterogeneity;  
27  
28 239 and 75%-100%: considerable heterogeneity<sup>28</sup>. We performed sensitivity analysis to assess if the  
29  
30 240 exclusion of studies at high risk of bias or with a small sample size ( $n < 20$ ) would have had an  
31  
32 241 impact on statistical heterogeneity. The small number of studies included in each meta-analysis  
33  
34 242 did not allow for sensitivity of subgroup analyses to be performed.  
35  
36  
37  
38  
39 243 Since less than 10 studies were included in the meta-analysis, we did not assess reporting biases  
40  
41 244 using a funnel plot, as suggested in the Cochrane Handbook<sup>29</sup>.  
42  
43  
44

## 45 245 **Assessment of the Quality of Evidence**

46  
47  
48 246 We worked independently and in duplicate (G.F. and M.-A.M.-C.) to assess the quality of  
49  
50 247 evidence for each individual outcome. We used the Grading of Recommendations Assessment,  
51  
52 248 Development, and Evaluation (GRADE) Web-based software, based upon the data extracted with  
53  
54 249 the data collection checklist<sup>30</sup>. We considered 5 factors (risk of bias of included studies,  
55  
56  
57  
58  
59

1  
2  
3 250 indirectness of evidence, unexplained heterogeneity or inconsistency of results, imprecision of  
4  
5 251 the results, probability of reporting bias) for downgrading the quality of the body of evidence for  
6  
7 252 each outcome<sup>30</sup>.

## 11 253 **Patient and Public Involvement**

12  
13  
14 254 Patients and the public were not involved in the selection of the research question and outcome  
15  
16 255 measures, or in the design of this systematic review and meta-analysis. No patients were involved  
17  
18 256 in the interpretation or writing up of results. We are unable to disseminate the results of the  
19  
20 257 research to study participants directly since this meta-analysis used aggregated data from  
21  
22  
23 258 previous trials.

## 26 259 **RESULTS**

### 29 260 **Study Flow**

30  
31  
32  
33 261 From a pool of 5,580 potentially relevant articles, we found 17 quantitative, controlled studies  
34  
35 262 assessing an AEE with health professionals or students (see **Figure 2**).

36  
37  
38 263 Out of 17 included studies in the qualitative synthesis, 4 studies compared two AEEs with design  
39  
40 264 variations<sup>31-34</sup>, 4 studies were not randomized<sup>35-38</sup>, and 1 study had missing data<sup>39</sup>. Thus, these 9  
41  
42 265 studies could not be included in the meta-analysis and the remaining 8 studies were used to  
43  
44  
45 266 calculate an ES on learning outcomes.

### 48 267 **Study Characteristics**

49  
50  
51 268 We summarized the key characteristics of included studies in table format (see **Table 1**). In terms  
52  
53 269 of study population, in the 17 studies we have found published between 2006 and 2017,  
54  
55  
56 270 investigators have evaluated AEEs mostly in the medical field, that is medical students (n=7)<sup>35 37</sup>



1  
2  
3 271 <sup>40-43</sup>, medical residents (n=7) <sup>31-34 36 44 45</sup>, nursing students (n=1) <sup>46</sup>, physicians in practice (n=1) <sup>39</sup>,  
4  
5 272 and health sciences students (n=1) <sup>47</sup>. The mean sample size was 56.53 participants (standard  
6  
7 273 deviation [SD] 44.13). In terms of study design, 13 out of 17 studies (77%) were randomized, 7  
8  
9 274 studies of which were randomized crossover trials <sup>32 33 41-45</sup>. The mean number of training  
10  
11 275 sessions was 2 (SD 1.07) and the mean training time was 4.33 hours (SD 3.79). Across the 17  
12  
13 276 studies, trainings with AEEs were spread over a mean period of time of 29.06 days (SD 44.91).  
14  
15 277 In terms of comparators, it is possible to underline three types of comparisons. The first  
16  
17 278 comparison is an AEE versus another AEE with design variations (n=4) <sup>31-34</sup>, which implies that  
18  
19 279 one of the AEEs assessed had variations in its adaptation techniques (e.g., feedback in one AEE  
20  
21 280 is longer or more complex than in the other). The second comparison is an AEE versus a  
22  
23 281 nonadaptive e-learning environment (n=8) <sup>35-37 40 42-44 47</sup>. The third and final comparison is an  
24  
25 282 AEE versus another type of educational intervention, such as a paper-based educational  
26  
27 283 intervention, including handouts, textbooks or images (n=3) <sup>39 41 45</sup>, and a traditional educational  
28  
29 284 intervention, such as a group lecture (n=1) <sup>46</sup>. As stated before, only the second and third types of  
30  
31 285 comparisons were included in the meta-analysis since our aim was to synthesize quantitatively th  
32  
33 286 effectiveness of AEEs versus other types of educational interventions. Finally, in terms of  
34  
35 287 outcomes, investigators evaluated learners' knowledge (n=11) <sup>31 32 34 35 37 41-46</sup>, satisfaction (n=9)  
36  
37 288 <sup>31 33 35 37 41-45</sup>, competence (including skills) (n=6) <sup>33 36 38-40 47</sup>, and metacognitive processes (n=3)  
38  
39 289 <sup>31 32 34</sup>. However, none of the studies reported the assessment of health professionals' and  
40  
41 290 students' clinical behavior.  
42  
43  
44  
45  
46  
47  
48  
49  
50  
51  
52  
53  
54  
55  
56  
57  
58  
59  
60

291 **Table 1. Characteristics of included studies.**

| First author, year<br>Country                                                                    | Participants*     | Study design†                                   | No. and duration of training<br>sessions | Duration of<br>intervention | Comparison(s)‡     | Outcome(s)§ |
|--------------------------------------------------------------------------------------------------|-------------------|-------------------------------------------------|------------------------------------------|-----------------------------|--------------------|-------------|
| <b>Comparison: adaptive e-learning environments vs. other educational interventions</b>          |                   |                                                 |                                          |                             |                    |             |
| <b>Cook, 2008<br/>USA</b>                                                                        | R; N = 122        | RXT; posttest-only, 4 groups                    | 4 sessions; 30 minutes each              | 126 days                    | NEE                | S, K        |
| Crowley, 2010<br>USA                                                                             | PP; N = 15        | RCT; pretest–posttest, 2 groups                 | 4 sessions; 4 hours each                 | 138 days                    | P                  | C Δ         |
| <b>Hayes-Roth, 2010<br/>USA</b>                                                                  | MS, NS; N = 30    | RCT; pretest–posttest–retention-test, 3 groups  | NR; mean training time 2.36 hours        | NR                          | 1. NEE<br>2. NI    | C Δ         |
| <b>Morente, 2013<br/>Spain</b>                                                                   | NS; N = 73        | RCT; pretest–posttest, 2 groups                 | 1 session; 4 hours                       | 1 day                       | L                  | K Δ         |
| Munoz, 2010<br>Colombia                                                                          | MS; N = 40        | NRCT; pretest–posttest, 2 groups                | NR; mean training time 5.97 hours        | NR                          | NEE                | S, K        |
| Romito, 2016<br>USA                                                                              | R; N = 24         | NRCT; pretest–posttest–retention-test, 2 groups | 1 session; 30 minutes                    | 1 day                       | NEE & L            | C Δ         |
| <b>Samulski, 2017<br/>USA</b>                                                                    | MS, R, PP; N = 36 | RXT; pretest–posttest, 2 groups                 | 2 sessions; 20 minutes to 14 hours       | 30 days                     | P                  | S, K        |
| <b>Thai, 2015<br/>USA</b>                                                                        | HSC; N = 87       | RCT; pretest–posttest–retention-test, 3 groups  | 1 session; 45 minutes                    | 1 day                       | 1. AEE<br>2. NEE   | C Δ         |
| <b>Van Es, 2015<br/>Australia</b>                                                                | R; N = 43         | RXT; posttest-only, 2 groups                    | 3 sessions; NR                           | 50 days                     | P                  | S, K Δ      |
| <b>Van Es, 2016<br/>Australia</b>                                                                | MS; N = 46        | RXT; posttest-only, 2 groups                    | 3 sessions; 2 hours each                 | 34 days                     | NEE                | S, K        |
| <b>Wong, 2015<br/>Australia</b>                                                                  | MS; N = 99        | RXT; posttest-only, 2 groups                    | 2 sessions; 1.5 hour each                | 14 days                     | NEE                | S, K Δ      |
| Wong, 2017<br>USA                                                                                | MS; N = 178       | NRCT; pretest–posttest–retention-test, 3 groups | 1 session; NR                            | 35 days                     | 1. L<br>2. AEE & T | C Δ         |
| Woo, 2006<br>USA                                                                                 | MS; N = 73        | NRCT; pretest–posttest, 3 groups                | 1 session; 2 hours                       | 1 day                       | 1. NEE<br>2. NI    | S, K        |
| <b>Comparison: adaptive e-learning vs. adaptive e-learning (two AEEs with design variations)</b> |                   |                                                 |                                          |                             |                    |             |
| Crowley, 2007<br>USA                                                                             | R; N = 21         | RCT; pretest–posttest–retention-test, 2 groups  | 1 session; 4.5 hours                     | 1 day                       | AEE                | S, M, K     |
| El Saadawi, 2008                                                                                 | R; N = 20         | RXT; pretest–posttest, 2 groups                 | 2 sessions; 2 hours each                 | 1 day                       | AEE                | S, C        |

1  
2  
3  
4  
5  
6  
7  
8  
9  
10  
11  
12  
13  
14  
15  
16  
17  
18  
19  
20  
21  
22  
23  
24  
25  
26  
27  
28  
29  
30  
31  
32  
33  
34  
35  
36  
37  
38  
39  
40  
41  
42  
43  
44  
45  
46  
47

|                            |           |                                 |                             |        |     |      |
|----------------------------|-----------|---------------------------------|-----------------------------|--------|-----|------|
| USA                        |           |                                 |                             |        |     |      |
| El Saadawi, 2010<br>USA    | R; N = 23 | RXT; pretest–posttest, 2 groups | 2 sessions; 2.25 hours each | 2 days | AEE | M, K |
| Feyzi-Begnagh, 2014<br>USA | R; N = 31 | RCT; pretest–posttest, 2 groups | 2 sessions; 2 & 3 hours     | 1 day  | AEE | M, K |

292  
293 \* Participants: MS indicates medical students; NS, nursing students; R, residents (physicians in postgraduate training); PP, physicians in practice; HSC, health sciences students.  
294 † Study design: RCT indicates randomized controlled trial; RXT, randomized crossover trial; NRCT, non-randomized controlled trial.  
295 ‡ Comparison: AEE indicates adaptive e-learning environment; NEE, nonadaptive e-learning environment; NI, no-intervention control group; L, large-group classroom instruction; P,  
296 paper-based instruction (handout, textbook, or latent image cases).  
297 § Outcomes: S indicates satisfaction; M, metacognitive processes; K, knowledge; C, competence (includes skills); B, behavior. Moreover, Δ indicates a statistically significant  
298 improvement regarding this outcome in the experimental group in comparison with the control group for studies comparing an AEE with other educational interventions..  
299 **Included in the meta-analysis**

Peer review only

## 300 **Characteristics of Adaptive E-learning Environments**

301 We summarized the key characteristics of AEEs assessed in the 17 studies in table format (see  
302 **Table 2**). In terms of the clinical topics of the AEEs, the majority of AEEs focused on training  
303 medical students and residents in executing and/or interpreting diagnostic tests. Indeed, the AEEs  
304 assessed focused on dermatopathology and cytopathology microscopy<sup>31-34 39 41 42 45</sup> (n=8), on  
305 diagnostic imaging<sup>36 43</sup> (n=2), on chronic disease management<sup>44</sup> (n=1), on pressure ulcer  
306 evaluation<sup>46</sup> (n=1), on the management of childhood illness<sup>35</sup> (n=1), on brief intervention for  
307 alcohol consumption<sup>40</sup> (n=1), on electrocardiography<sup>47</sup> (n=1), on fetal heart rate interpretation<sup>38</sup>  
308 (n=1), and on hemodynamics<sup>37</sup> (n=1). Four out of 17 AEEs focused on developing the  
309 knowledge or skills of health professionals and students with regard to performing interventions  
310 in clinical practice<sup>35 40 44 46</sup>. Investigators adopted a wide variety of theoretical frameworks in the  
311 17 studies. The most frequently used framework was cognitive tutoring, adopted in 5 studies<sup>31-34</sup>  
312<sup>39</sup>, which implies the use of a cognitive model. The integration of a cognitive model in an AEE  
313 implies the representation of all the knowledge in the field of interest in a way that is similar to  
314 the human mind for the purpose of understanding and predicting the cognitive processes of  
315 learners<sup>48</sup>. The second most used framework was perceptual learning, adopted in 3 studies<sup>36 38 47</sup>.  
316 Perceptual learning aims at improving information extraction skills of the environment and the  
317 development of automaticity in this respect in learners<sup>36</sup>. Theoretical frameworks relating to self-  
318 regulated learning<sup>34</sup>, learning styles<sup>35</sup>, guided mastery<sup>40</sup>, and cognitive load<sup>43</sup> were also used.

319 We propose 4 subdomains that emerged from the review to characterize the adaptation process of  
320 AEEs reported in the 17 studies: the goals of adaptation, the variables targeted by the adaptation  
321 process, the adaptation techniques, and the timing of the adaptation.

### 322 First Subdomain: Goals of the Adaptation Process

323 This subdomain relates to the purpose of the adaptation process within the AEE. For most AEEs,  
324 the adaptation process aims primarily to increase the effectiveness and/or efficiency of  
325 knowledge acquisition and competence development relative to other training methods<sup>31 34 35 37</sup>  
326<sup>40-47</sup>. For instance, several AEEs aimed to increase the diagnostic accuracy and reporting  
327 performance of medical students and residents<sup>31-33 36 38 39</sup>. In cases where two adaptive AEEs  
328 with certain variations in their techno-pedagogical design are compared with each other, the  
329 adaptation process generally aims at improving the metacognitive and cognitive processes related  
330 to learning<sup>31 32 34</sup>.

### 331 Second Subdomain: Variables Targeted by the Adaptation Process

332 This subdomain relates to the user-related data (variables) upon which the adaptation process is  
333 based. The most frequently targeted variable is the user's scores after an assessment or a question  
334 within the AEE (e.g., knowledge/skills scores, response accuracy scores)<sup>35-38 40-47</sup>. Other  
335 frequently targeted variables include the user's actions during its use of the AEE (e.g., results of  
336 problem-solving tasks, results of reporting tasks, requests for help)<sup>31-34 39</sup>, and the user's response  
337 time regarding a specific question or task<sup>36 38 47</sup>.

### 338 Third Subdomain: Adaptation Techniques

339 The third subdomain relates to which adaptation techniques are mobilized in the AEE. In the  
340 context of this review, the adaptation techniques are based upon the work of Knutov and  
341 colleagues<sup>8</sup>. *Content adaptation* was the most used adaptation technique; it was implemented in  
342 all AEEs reviewed (n=17). Content adaptation aims to adapt the textual information (curriculum  
343 content) to the learner's profile through different mechanisms and to different degrees<sup>8</sup>.

1  
2  
3 344 *Navigation adaptation* was the second most used adaptation technique (n=13). Navigation can be  
4  
5 345 adapted in two ways; it can be enforced or suggested. When enforced, an optimal personalized  
6  
7 346 learning path is determined for the user by the algorithms within the AEE. When suggested, there  
8  
9  
10 347 are several personalized learning paths available to each user, who can determine the path he  
11  
12 348 prefers himself<sup>8</sup>. Most reviewed studies included AEEs with enforced navigation, with one  
13  
14 349 optimal personalized learning path being determined through various algorithms. *Multimedia*  
15  
16 350 *adaptation* was the third most used adaptation technique (n=10). This adaptation technique, much  
17  
18  
19 351 like content adaptation which relates to textual information, implies the adaptation of the  
20  
21 352 multimedia elements of the training such as videos, pictures, models, to the user's profile.  
22  
23 353 *Presentation adaptation* was the fourth most used adaptation technique (n=8). It implies the  
24  
25 354 adaptation of the layout of the page to the digital device used, or to the user's profile. *Tools*  
26  
27 355 *adaptation* was the least used adaptation technique (n=7). This technique results in providing a  
28  
29  
30 356 different set of features or learning strategies for different types of users, such as different  
31  
32 357 interfaces for problem solving, and knowledge representation.

#### 36 358 **Fourth Subdomain: Timing of the Adaptation**

37  
38  
39 359 This last subdomain relates to *when* the adaptation occurs during the learning process with the  
40  
41 360 AEE. In 16 out of 17 studies, the adaptation occurred throughout the training with AEE, usually  
42  
43 361 after an answer to a question or during intermediate problem-solving steps. In one study,  
44  
45 362 adaptation techniques were only implemented at the beginning of the training with the AEE<sup>35</sup>.

46  
47  
48  
49 363

50  
51  
52 364

365 **Table 2. Characteristics of adaptive e-learning environments**

| First author, year         | Adaptive e-learning environment design            |                                                         |             |                                                            |                                                                                    | Adaptation process: four subdomains    |            |                 |               |       |                                                                        |
|----------------------------|---------------------------------------------------|---------------------------------------------------------|-------------|------------------------------------------------------------|------------------------------------------------------------------------------------|----------------------------------------|------------|-----------------|---------------|-------|------------------------------------------------------------------------|
|                            | Clinical Topic(s)                                 | Theoretical framework(s)                                | Platform    | First subdomain: Adaptation for which goals or objectives? | Second subdomain: Adaptation to which user-related variables?                      | Third subdomain: Adaptation techniques |            |                 |               |       | Fourth subdomain: Timing of adaptation                                 |
|                            |                                                   |                                                         |             |                                                            |                                                                                    | Content                                | Navigation | Personalisation | Interactivity | Tools |                                                                        |
| <b>Cook, 2008</b>          | Diabetes, hyperlipidemia, asthma, depression      | NR                                                      | NR          | LEF                                                        | User knowledge                                                                     | ✓                                      | ✓          |                 |               |       | After each case-based question in each module (17 to 21 times/module). |
| <b>Crowley, 2007</b>       | Dermopathology; subepidermal vesicular dermatitis | Cognitive Tutoring                                      | SlideTutor  | LE, MC, DX.                                                | User actions: results of problem-solving tasks; requests for help                  | ✓                                      | ✓          | ✓               | ✓             | ✓     | At the beginning of each case.                                         |
| <b>Crowley, 2010</b>       | Dermopathology; melanoma                          | Cognitive Tutoring                                      | SlideTutor  | DX, RP.                                                    | User actions: results of problem-solving tasks; reporting tasks; requests for help | ✓                                      | ✓          | ✓               | ✓             | ✓     | At the beginning of each case.                                         |
| <b>El Saadawi, 2008</b>    | Dermopathology; melanoma                          | Cognitive Tutoring                                      | ReportTutor | DX, RP.                                                    | User actions, report features                                                      | ✓                                      | ✓          | ✓               | ✓             |       | At the beginning of each case.                                         |
| <b>El Saadawi, 2010</b>    | Dermopathology                                    | Cognitive Tutoring                                      | SlideTutor  | DX, MC.                                                    | User actions: results of problem-solving tasks; reporting tasks; requests for help | ✓                                      | ✓          | ✓               | ✓             |       | During intermediate problem-solving steps.                             |
| <b>Feyzi-Begnagh, 2014</b> | Dermopathology; nodular and diffuse dermatitides  | Cognitive Tutoring, Theories of Self-Regulated Learning | SlideTutor  | LE, MC                                                     | User actions: results of problem-solving tasks; reporting tasks; requests for help | ✓                                      | ✓          | ✓               | ✓             | ✓     | During each case or immediately after each case.                       |

|    |                         |                                                                                 |                                                    |               |         |                                            |   |   |   |                                            |                                            |                                            |
|----|-------------------------|---------------------------------------------------------------------------------|----------------------------------------------------|---------------|---------|--------------------------------------------|---|---|---|--------------------------------------------|--------------------------------------------|--------------------------------------------|
| 1  |                         |                                                                                 |                                                    |               |         |                                            |   |   |   |                                            |                                            |                                            |
| 2  |                         |                                                                                 |                                                    |               |         |                                            |   |   |   |                                            |                                            |                                            |
| 3  |                         |                                                                                 |                                                    |               |         |                                            |   |   |   |                                            |                                            |                                            |
| 4  | <b>Hayes-Roth, 2010</b> | Brief intervention training in alcohol abuse                                    | Guided Mastery                                     | STAR Workshop | LE      | User scores, user-generated dialogue       | ✓ | ✓ |   | During clinical cases                      |                                            |                                            |
| 5  |                         |                                                                                 |                                                    |               |         |                                            |   |   |   |                                            |                                            |                                            |
| 6  |                         |                                                                                 |                                                    |               |         |                                            |   |   |   |                                            |                                            |                                            |
| 7  |                         |                                                                                 |                                                    |               |         |                                            |   |   |   |                                            |                                            |                                            |
| 8  | <b>Morente, 2013</b>    | Pressure ulcer evaluation                                                       | NR                                                 | ePULab        | LE      | User skills                                | ✓ |   |   | Each pressure ulcer evaluation.            |                                            |                                            |
| 9  |                         |                                                                                 |                                                    |               |         |                                            |   |   |   |                                            |                                            |                                            |
| 10 |                         |                                                                                 |                                                    |               |         |                                            |   |   |   |                                            |                                            |                                            |
| 11 | <b>Munoz, 2010</b>      | Management of childhood illness                                                 | Learning Styles Framework                          | SIAS-ITS      | LE, LEF | User knowledge, user learning style        | ✓ |   | ✓ | At the beginning of the training.          |                                            |                                            |
| 12 |                         |                                                                                 |                                                    |               |         |                                            |   |   |   |                                            |                                            |                                            |
| 13 |                         |                                                                                 |                                                    |               |         |                                            |   |   |   |                                            |                                            |                                            |
| 14 |                         |                                                                                 |                                                    |               |         |                                            |   |   |   |                                            |                                            |                                            |
| 15 |                         |                                                                                 |                                                    |               |         |                                            |   |   |   |                                            |                                            |                                            |
| 16 | <b>Romito, 2016</b>     | Transoesophageal echocardiography                                               | Perceptual Learning                                | TOE PALM      | DX      | User response accuracy, user response time | ✓ | ✓ | ✓ | After each clinical case.                  |                                            |                                            |
| 17 |                         |                                                                                 |                                                    |               |         |                                            |   |   |   |                                            |                                            |                                            |
| 18 |                         |                                                                                 |                                                    |               |         |                                            |   |   |   |                                            |                                            |                                            |
| 19 |                         |                                                                                 |                                                    |               |         |                                            |   |   |   |                                            |                                            |                                            |
| 20 | <b>Samulski, 2017</b>   | Cytopathology; pap test, squamous lesions, glandular lesions                    | NR                                                 | SmartSparrow  | LE      | User knowledge                             | ✓ | ✓ |   | During intermediate problem-solving steps. |                                            |                                            |
| 21 |                         |                                                                                 |                                                    |               |         |                                            |   |   |   |                                            |                                            |                                            |
| 22 |                         |                                                                                 |                                                    |               |         |                                            |   |   |   |                                            |                                            |                                            |
| 23 |                         |                                                                                 |                                                    |               |         |                                            |   |   |   |                                            |                                            |                                            |
| 24 | <b>Thai, 2015</b>       | Electrocardiography                                                             | Perceptual Learning Theory; Adaptive response-time | PALM          | LE, LEF | User response accuracy, user response time | ✓ |   | ✓ | ✓                                          | ✓                                          | After each user response.                  |
| 25 |                         |                                                                                 |                                                    |               |         |                                            |   |   |   |                                            |                                            |                                            |
| 26 |                         |                                                                                 |                                                    |               |         |                                            |   |   |   |                                            |                                            |                                            |
| 27 |                         |                                                                                 |                                                    |               |         |                                            |   |   |   |                                            |                                            |                                            |
| 28 | <b>Van Es, 2015</b>     | Diagnostic cytopathology; gynecology, fine needle aspiration, exfoliative fluid | NR                                                 | SmartSparrow  | LE      | User responses                             | ✓ | ✓ | ✓ | ✓                                          | During intermediate problem-solving steps. |                                            |
| 29 |                         |                                                                                 |                                                    |               |         |                                            |   |   |   |                                            |                                            |                                            |
| 30 |                         |                                                                                 |                                                    |               |         |                                            |   |   |   |                                            |                                            |                                            |
| 31 |                         |                                                                                 |                                                    |               |         |                                            |   |   |   |                                            |                                            |                                            |
| 32 |                         |                                                                                 |                                                    |               |         |                                            |   |   |   |                                            |                                            |                                            |
| 33 | <b>Van Es, 2016</b>     | Diagnostic cytopathology; gynecology, fine needle aspiration, exfoliative fluid | NR                                                 | SmartSparrow  | LE      | User responses                             | ✓ | ✓ | ✓ | ✓                                          | ✓                                          | During intermediate problem-solving steps. |
| 34 |                         |                                                                                 |                                                    |               |         |                                            |   |   |   |                                            |                                            |                                            |
| 35 |                         |                                                                                 |                                                    |               |         |                                            |   |   |   |                                            |                                            |                                            |
| 36 |                         |                                                                                 |                                                    |               |         |                                            |   |   |   |                                            |                                            |                                            |
| 37 |                         |                                                                                 |                                                    |               |         |                                            |   |   |   |                                            |                                            |                                            |
| 38 | <b>Wong, 2015</b>       | Diagnostic imaging; chest X-rays, CT scans                                      | Cognitive Load Theory                              | SmartSparrow  | LE      | User responses                             | ✓ |   |   |                                            | During intermediate problem-solving steps. |                                            |
| 39 |                         |                                                                                 |                                                    |               |         |                                            |   |   |   |                                            |                                            |                                            |
| 40 |                         |                                                                                 |                                                    |               |         |                                            |   |   |   |                                            |                                            |                                            |
| 41 |                         |                                                                                 |                                                    |               |         |                                            |   |   |   |                                            |                                            |                                            |
| 42 |                         |                                                                                 |                                                    |               |         |                                            |   |   |   |                                            |                                            |                                            |
| 43 |                         |                                                                                 |                                                    |               |         |                                            |   |   |   |                                            |                                            |                                            |
| 44 |                         |                                                                                 |                                                    |               |         |                                            |   |   |   |                                            |                                            |                                            |
| 45 |                         |                                                                                 |                                                    |               |         |                                            |   |   |   |                                            |                                            |                                            |
| 46 |                         |                                                                                 |                                                    |               |         |                                            |   |   |   |                                            |                                            |                                            |
| 47 |                         |                                                                                 |                                                    |               |         |                                            |   |   |   |                                            |                                            |                                            |



|    |                   |                                   |                     |               |    |                                            |   |   |   |                           |
|----|-------------------|-----------------------------------|---------------------|---------------|----|--------------------------------------------|---|---|---|---------------------------|
| 1  |                   |                                   |                     |               |    |                                            |   |   |   |                           |
| 2  |                   |                                   |                     |               |    |                                            |   |   |   |                           |
| 3  |                   |                                   |                     |               |    |                                            |   |   |   |                           |
| 4  | <b>Wong, 2017</b> | Fetal heart rate interpretation   | Perceptual Learning | PALM          | DX | User response accuracy, user response time | ✓ | ✓ | ✓ | After each clinical case. |
| 5  |                   |                                   |                     |               |    |                                            |   |   |   |                           |
| 6  |                   |                                   |                     |               |    |                                            |   |   |   |                           |
| 7  |                   |                                   |                     |               |    |                                            |   |   |   |                           |
| 8  | <b>Woo, 2006</b>  | Hemodynamics; baroreceptor reflex | NR                  | CIRCSIM-Tutor | LE | User knowledge, user responses             | ✓ | ✓ | ✓ | After each user response. |
| 9  |                   |                                   |                     |               |    |                                            |   |   |   |                           |
| 10 |                   |                                   |                     |               |    |                                            |   |   |   |                           |

Goals/Objectives : LE indicates learning effectiveness; LEF learning efficiency; DX diagnostic accuracy; MC metacognitive gains; RP reporting performance.  
 NR indicates not reported.

11 366  
 12 367  
 13 368  
 14  
 15 369  
 16  
 17  
 18 370  
 19  
 20  
 21 371  
 22  
 23  
 24 372  
 25  
 26  
 27 373  
 28  
 29  
 30 374  
 31  
 32  
 33  
 34 375  
 35  
 36  
 37 376  
 38  
 39  
 40  
 41  
 42  
 43  
 44  
 45  
 46  
 47

For peer review only

## 377 Risk of Bias Assessment

378 Results of included studies for the risk of bias assessment are presented in **Figure 3** and **Figure 4**.

379 In  $\geq 75\%$  of studies, biases related to random sequence generation, similarity of baseline outcome  
380 measurements, and selective reporting of outcomes were low. Moreover, in  $\geq 50\%$  of studies,  
381 biases related to the blinding of outcome assessment and contamination were low. Regarding the  
382 blinding of outcome assessment, in most studies, review authors judged that the outcome and the  
383 outcome measurement were not likely to be influenced by the lack of blinding, since studies had  
384 objective measures, i.e. an evaluative test of knowledge or competence. Regarding contamination  
385 bias, review authors scored studies at high risk if they had a crossover design.

386 However, in  $\geq 50\%$  of studies, biases related to allocation concealment, similarity of baseline  
387 characteristics, blinding of participants and personnel, and incomplete outcome data were unclear  
388 or high. Review authors, by consensus, decided that the cut-off criterion in terms of risk of bias to  
389 be included in the meta-analysis was randomization of study participants. Thus, the four  
390 studies<sup>35-38</sup> that presented high or unclear risk of bias regarding random sequence generation  
391 were not included in the meta-analysis.

## 392 Quantitative Results

### 393 Effectiveness of AEEs versus other educational interventions in improving all learning outcomes

394 As we considered effect sizes larger than 0.8 to be large<sup>49</sup>, the pooled effect size (SMD 1.32;  
395 95% confidence interval [CI] 0.20-2.43;  $Z = 2.32$ ,  $P = 0.02$ ) of AEEs compared to other educational  
396 interventions in improving all learning outcomes suggests a significantly large effect (see **Figure**  
397 **5**). However, significant statistical heterogeneity was observed among studies ( $I^2 = 96\%$ ,  $P$   
398  $< .00001$ ), and individual effect sizes ranged from -1.10 to 3.05.

### 399 Effectiveness of AEEs versus other educational interventions in improving knowledge

400 The pooled effect size (SMD 1.04; 95% CI -0.86-2.94;  $Z = 1.08$ ,  $P 0.28$ ) of AEEs compared to  
401 other educational interventions in improving knowledge suggests a large, but nonsignificant  
402 effect (see **Figure 6**). Significant statistical heterogeneity was observed among studies ( $I^2 = 98\%$ ,  $P$   
403  $<.00001$ ), and individual effect sizes ranged from -1.10 to 3.05. One study in particular<sup>44</sup> reported  
404 a negative effect size, but the difference between groups in knowledge scores was statistically  
405 nonsignificant. Moreover, while participants using the AEE in the experimental group reported  
406 the same knowledge scores than participants in the control group at the end of study, time spent  
407 on instruction was reduced by 18% with the AEE compared to the nonadaptive e-learning  
408 environment, thus improving learning efficiency<sup>44</sup>.

### 409 Effectiveness of AEEs versus other educational interventions in improving competence

410 The pooled effect size (SMD 1.55; 95% CI 0.50-2.60;  $Z = 2.90$ ,  $P 0.004$ ) of AEEs compared to  
411 other educational interventions in improving competence suggests a significantly large effect (see  
412 **Figure 7**). Statistical heterogeneity was lower than in previous analyses, but was still significant  
413 ( $I^2 = 84\%$ ,  $P <.00001$ ). Individual effect sizes ranged from 0.60 to 2.87.

### 414 Quality of the Evidence

415 The quality of evidence table produced with GRADE, as well as the justifications for each  
416 decision, is presented in **Supplementary File 3** (GRADE quality of evidence levels: very low, low,  
417 moderate, high). For knowledge, the quality of evidence was deemed to be very low. More  
418 precisely, risk of bias was deemed serious, inconsistency serious, indirectness not serious, and  
419 imprecision serious. For competence, the quality of evidence was deemed to be low. More

1  
2  
3 420 precisely, risk of bias was deemed serious, inconsistency serious, indirectness not serious, and  
4  
5 421 imprecision serious.  
6  
7

## 8 422 **DISCUSSION**

### 9 423 **Principal Findings**

10  
11  
12 424 This is the first systematic review and meta-analysis to evaluate the effectiveness of AEEs in  
13  
14  
15 425 health professionals and students. We identified 17 relevant studies published since 2006, 13 of  
16  
17  
18 426 which assessed an AEE versus another educational intervention (large-group classroom  
19  
20  
21 427 instruction, nonadaptive e-learning environment or paper-based learning), and 4 of which  
22  
23  
24 428 assessed 2 AEEs with design variations head-to-head. When compared with other educational  
25  
26  
27 429 interventions, AEEs were associated with statistically significant improvements in learning  
28  
29 430 outcomes in 9 out of 13 studies. Pooled ES were large for knowledge and competence, but only  
30  
31 431 the latter was associated with a statistically significant effect. Statistical heterogeneity was high  
32  
33 432 in all analyses. However, this finding is consistent with other meta-analyses in the field of  
34  
35 433 medical education that also reported high heterogeneity across studies<sup>50-52</sup>. A small number of  
36  
37 434 eligible studies prohibited us from performing subgroup analyses which could have helped in  
38  
39  
40 435 explaining the source of the heterogeneity. The quality of evidence for all comparisons was  
41  
42  
43 436 either low or very low. Therefore, while we believe the results support the potential of AEEs for  
44  
45 437 the education of health professionals and students, we recommend interpreting the ES with  
46  
47 438 caution.  
48  
49

### 50 439 **Comparison with Other Studies**

51  
52  
53 440 To our knowledge, no previous systematic review and meta-analysis has specifically assessed the  
54  
55  
56 441 effectiveness of AEEs in improving learning outcomes in health professionals and students, or  
57  
58  
59  
60

1  
2  
3 442 any other population. However, interestingly, since the 1990's there has been a strong research  
4  
5 443 interest in the field of AEEs that integrate artificial intelligence (also known as intelligent e-  
6  
7 444 learning environments [IEEs] and intelligent tutoring systems [ITSs], **Type B2**) into elementary,  
8  
9  
10 445 high school and postsecondary education for multiple subjects.<sup>15</sup> Thus, multiple meta-analyses  
11  
12 446 have been conducted with regard to AEEs in that setting.  
13  
14

15 447 Steenbergen-Hu and Cooper<sup>13</sup> reported a mean ES of 0.35 of AEEs integrating artificial  
16  
17 448 intelligence on learning outcomes in college students when compared to all other types of  
18  
19 449 educational interventions. The mean ES was 0.37 when the comparator was large-group  
20  
21 450 classroom instruction, 0.35 when the comparator was nonadaptive e-learning, and 0.47 when the  
22  
23 451 comparator was textbooks or workbooks<sup>13</sup>.  
24  
25  
26

27 452 Ma, et al.<sup>16</sup> reported a mean ES of 0.42 of AEEs integrating artificial intelligence on learning  
28  
29 453 outcomes in elementary, high school and postsecondary students when compared to large-group  
30  
31 454 classroom instruction. The mean ES was 0.57 when the comparator was nonadaptive e-learning,  
32  
33 455 and 0.35 when the comparator was textbooks or workbooks. Interestingly, the mean ES was  
34  
35 456 higher for studies which assessed an AEE in biology and physiology (0.59) and in humanities and  
36  
37 457 social science (0.63) than in studies which assessed an AEE in mathematics (0.35) and physics  
38  
39 458 (0.38)<sup>16</sup>.  
40  
41  
42  
43

44 459 Kulik and Fletcher<sup>15</sup> reported a mean ES of 0.65 of AEEs integrating artificial intelligence on  
45  
46 460 learning outcomes in elementary, high school, and postsecondary students when compared to  
47  
48 461 large-group classroom instruction. Education areas in this review were diverse (e.g.,  
49  
50 462 mathematics, computer science, physics), but none were related to health sciences. Interestingly,  
51  
52 463 the mean ES was 0.78 for studies up to 80 participants, and 0.30 for studies with more than 250  
53  
54  
55  
56  
57  
58  
59

1  
2  
3 464 participants. Moreover, the mean ES for studies conducted with elementary and high school  
4  
5 465 students was 0.44, compared to 0.75 for studies conducted with postsecondary students<sup>15</sup>.  
6  
7  
8 466 Thus, in light of the results of these meta-analyses, the ES reported in our review may appear  
9  
10 467 high. However, our review looked more specifically into the effectiveness of AEEs in improving  
11  
12 468 learning outcomes in health professionals and students. This is significant since, in the meta-  
13  
14 469 analyses of Steenbergen-Hu and Cooper<sup>13</sup>, Ma, et al.<sup>16</sup>, and Kulik and Fletcher<sup>15</sup>, AEEs seem to  
15  
16  
17 470 be more effective in postsecondary students<sup>15 16</sup> and for learning subjects related to biology,  
18  
19 471 physiology and social science<sup>16</sup>. Moreover, previous meta-analyses focused on the effectiveness  
20  
21 472 of AEEs in improving procedural and declarative knowledge, and did not report on the  
22  
23 473 effectiveness on AEEs in improving skills or competence. This is important since AEEs may be  
24  
25 474 more effective for providing tailored guidance and coaching for developing skills and  
26  
27 475 competence regarding complex clinical interventions, rather than learning factual knowledge, as  
28  
29 476 the results of our review suggest.  
30  
31  
32  
33

### 34 477 **Strengths and Limitations**

35  
36  
37 478 Strengths of this systematic review and meta-analysis include the prospective registration and  
38  
39 479 publication of a protocol based on rigorous methods in accordance with Cochrane and PRISMA  
40  
41 480 guidelines; the exhaustive search in all relevant databases; the independent screening of the titles,  
42  
43 481 abstracts and full-text of studies; the assessment of each included studies' risk of bias using  
44  
45 482 EPOC Cochrane guidelines; and the assessment of the quality of evidence for each individual  
46  
47 483 outcome using the GRADE methodology.  
48  
49  
50

51  
52 484 Our review also has limitations to consider. First, outcome measures varied widely across  
53  
54 485 studies. To address this issue, we conducted the meta-analysis using the SMD. Using the SMD  
55  
56  
57  
58  
59  
60

1  
2  
3 486 allowed us to standardize the results of studies to a uniform scale before pooling them. However,  
4  
5 487 the SMD also has drawbacks, since this method assumes that the differences in SDs reflect  
6  
7 488 differences in outcome measures, and not differences attributable to variability among study  
8  
9  
10 489 populations<sup>29</sup>. Nevertheless, review authors judged that using the SMD was the best option for  
11  
12 490 this review, as it is the current practice in the field of knowledge synthesis in medical education<sup>12</sup>  
13  
14 491 <sup>50</sup>.

15  
16  
17  
18 492 Second, there was high inconsistency among study results, which we can mostly attribute to  
19  
20 493 differences in populations, AEE design, research methods, and outcomes. This resulted in  
21  
22 494 sometimes widely differing estimates of effect. To partly address this issue, we used a random-  
23  
24 495 effects model for the meta-analysis, which assumes that the effects estimated in the studies are  
25  
26 496 different and follow a distribution<sup>29</sup>. However, since a random-effects model awards more weight  
27  
28  
29 497 to smaller studies to learn about the distribution of effects, it could potentially exacerbate the  
30  
31 498 effects of the bias in these studies<sup>29</sup>.

32  
33  
34  
35 499 Third, we made the decision to limit our search from the year 2005 onwards. This decision was  
36  
37 500 based on the fact that studies published before 2005 seem to have a bias toward more positive  
38  
39 501 results<sup>15</sup>. This could be explained by the novelty of e-learning in earlier studies, which could  
40  
41 502 have positively affected student motivation and learning outcomes. Moreover, educational  
42  
43  
44 503 technology has significantly evolved since the early 2000s.

45  
46  
47 504 Finally, publication bias could not be assessed by the means of a funnel plot since there were less  
48  
49 505 than 10 studies included in the meta-analysis.  
50  
51  
52  
53  
54  
55  
56  
57  
58  
59  
60

## 506 CONCLUSIONS

507 We found low and very low quality evidence that AEEs are associated with improved learning  
508 outcomes in health professionals and students in comparison with other educational interventions,  
509 such as nonadaptive e-learning environments and large-group classroom learning, across a range  
510 of topics. Heterogeneity was high across populations, interventions, comparators, outcomes and  
511 study designs.

512 In terms of *population*, future research should focus on assessing AEEs with health professionals  
513 in practice, such as registered nurses and physicians, rather than students in these disciplines.  
514 This could provide key insights into how AEEs can impact clinical behavior and, ultimately,  
515 patient outcomes. In terms of *interventions*, researchers should report more clearly on the goals of  
516 adaptation, the targeted variables by the adaptation process, the techniques of adaptation, and the  
517 timing of adaptation. Moreover, researchers should provide additional details regarding the  
518 underlining algorithms allowing the adaptation process in order to ensure replicability of  
519 findings. Regarding *comparators*, this review suggests there is a need for additional research  
520 using traditional comparators (i.e., large group classroom instruction) and more specific  
521 comparators (i.e., adaptive e-learning environment with design variations). Regarding *outcomes*  
522 and outcome measures, researchers should use validated measurement tools of knowledge,  
523 competence, and clinical behavior to facilitate knowledge synthesis. Moreover, the absence of  
524 studies assessing the impact of AEEs on health professionals' and students' clinical behavior  
525 demonstrates the need for further research with higher-level outcomes. Finally, in terms of *study*  
526 *designs*, researchers should focus on research designs allowing the assessment of the impact of  
527 multiple educational design variations and adaptation techniques within one study, such as  
528 factorial experiments.



## 529 **ACKNOWLEDGEMENTS**

530 G.F. was supported by the Vanier Canada Graduate Scholarship (Canadian Institutes of Health  
531 Research), a doctoral fellowship from Quebec's Healthcare Research Fund, the AstraZeneca and  
532 Dr. Kathryn J. Hannah scholarships from the Canadian Nurses Foundation, a doctoral scholarship  
533 from the Montreal Heart Institute Foundation, a doctoral scholarship from Quebec's Ministry of  
534 Higher Education, and multiple scholarships from the Faculty of Nursing at the University of  
535 Montreal. M.-A.M.-C. was supported by a doctoral fellowship from Quebec's Healthcare  
536 Research Fund, a doctoral scholarship from the Montreal Heart Institute Foundation, a doctoral  
537 scholarship from Quebec's Ministry of Higher Education, and multiple scholarships from the  
538 Faculty of Nursing at the University of Montreal. T.M. was supported by a postdoctoral  
539 fellowship from Quebec's Healthcare Research Fund, a postdoctoral scholarship from the  
540 Montreal Heart Institute Foundation. M.-F.D. was supported by a doctoral fellowship from  
541 Canada's Social Sciences and Humanities Research Council, and a scholarship from the Center  
542 for Innovation in Nursing Education.

543 We would like to thank Kate Johnson for her careful manuscript editing.

## 544 **CONTRIBUTORSHIP STATEMENT**

545 All review authors contributed to at least one aspect of each of the four criteria for authorship  
546 defined by the International Committee for Medical Journal Editors (ICJME).

547 G.F. contributed to the conception and design of the review, to the acquisition and analysis of  
548 data, and to the interpretation of results. Moreover, G.F. drafted the initial manuscript. S.C.  
549 contributed to the conception and design of the review, and to the interpretation of results. M.-  
550 A.M.-C. contributed to the conception and design of the review, to the acquisition of data, and

1  
2  
3 551 interpretation of results. T.M. contributed to the conception and design of the review, to the  
4  
5 552 acquisition of data, and to the interpretation of results. M.-F.D. contributed to the conception and  
6  
7 553 design of the review, to the acquisition of data, and to the interpretation of results. G.M.-D.  
8  
9 554 contributed to the conception and design of the review, and to the interpretation of results. J.C.  
10  
11 555 contributed to the interpretation of results. M.-P.G. contributed to the interpretation of results.  
12  
13 556 V.D. contributed to the interpretation of results.  
14  
15  
16  
17

18 557 All review authors contributed to manuscript writing, critically revised the manuscript, gave final  
19  
20 558 approval, and agreed to be accountable for all aspects of work, ensuring integrity and accuracy.  
21  
22

### 23 559 **COMPETING INTERESTS**

24  
25  
26 560 All authors have completed the ICMJE uniform disclosure form at  
27  
28 561 [www.icmje.org/coi\\_disclosure.pdf](http://www.icmje.org/coi_disclosure.pdf) and declare: no support from any organisation for the  
29  
30 562 submitted work; no financial relationships with any organisation that might have an interest in the  
31  
32 563 submitted work in the previous three years; no other relationships or activities that could appear  
33  
34 564 to have influenced the submitted work.  
35  
36  
37  
38

### 39 565 **FUNDING**

40  
41  
42 566 This study received no funding.  
43  
44

### 45 567 **DATA SHARING STATEMENT**

46  
47  
48 568 No additional data are available.  
49  
50  
51  
52  
53  
54  
55  
56  
57  
58  
59  
60

## 569 REFERENCES

- 1  
2  
3  
4  
5  
6  
7 570 1. Clark R, Mayer R. E-Learning and the Science of Instruction: Proven Guidelines for  
8 571 Consumers and Designers of Multimedia Learning. 4 ed. Hoboken, NJ: John Wiley &  
9 572 Sons 2016.
- 10  
11 573 2. Cheng B, Wang M, Mørch AI, et al. Research on e-learning in the workplace 2000–2012: A  
12 574 bibliometric analysis of the literature. *Educational Research Review* 2014;11:56-72. doi:  
13 575 10.1016/j.edurev.2014.01.001
- 14  
15 576 3. Fontaine G, Cossette S, Heppell S, et al. Evaluation of a web-based e-learning platform for  
16 577 brief motivational interviewing by cardiovascular care nurses: a pilot study. *Journal of*  
17 578 *Medical Internet Research* 2016;8(18):e224. doi: 10.2196/jmir.6298 [published Online  
19 579 First: August 18th 2016]
- 20  
21 580 4. George PP, Papachristou N, Belisario JM, et al. Online eLearning for undergraduates in health  
22 581 professions: A systematic review of the impact on knowledge, skills, attitudes and  
23 582 satisfaction. *J Glob Health* 2014;4(1):010406. doi: 10.7189/jogh.04.010406
- 24  
25 583 5. Ellaway RH, Pusic MV, Galbraith RM, et al. Developing the role of big data and analytics in  
26 584 health professional education. *Medical Teacher* 2014;36(3):216-22. doi:  
28 585 10.3109/0142159X.2014.874553
- 29  
30 586 6. Desmarais MC, Baker RSJ. A review of recent advances in learner and skill modeling in  
31 587 intelligent learning environments. *User Modeling and User-Adapted Interaction*  
32 588 2012;22(1-2):9-38. doi: 10.1007/s11257-011-9106-8
- 33  
34 589 7. Knutov E, De Bra P, Pechenizkiy M. Generic adaptation framework: A process-oriented  
35 590 perspective. *Journal of Digital Information* 2011;12(1):1-22.
- 36  
37 591 8. Knutov E, De Bra P, Pechenizkiy M. AH 12 years later: A comprehensive survey of adaptive  
38 592 hypermedia methods and techniques. *New Review of Hypermedia and Multimedia*  
40 593 2009;15(1):5-38. doi: 10.1080/13614560902801608
- 41  
42 594 9. Akbulut Y, Cardak CS. Adaptive educational hypermedia accommodating learning styles: A  
43 595 content analysis of publications from 2000 to 2011. *Computers & Education*  
44 596 2012;58(2):835-42. doi: 10.1016/j.compedu.2011.10.008
- 45  
46 597 10. Brusilovsky P, Peylo C. Adaptive and Intelligent Web-based Educational Systems.  
47 598 *International Journal of Artificial Intelligence in Education* 2003;13:159-72.
- 49  
50 599 11. Lahti M, Hatonen H, Valimaki M. Impact of e-learning on nurses' and student nurses  
51 600 knowledge, skills, and satisfaction: a systematic review and meta-analysis. *International*  
52 601 *journal of nursing studies* 2014;51(1):136-49. doi: 10.1016/j.ijnurstu.2012.12.017  
53 602 [published Online First: 2013/02/07]
- 54  
55  
56  
57  
58  
59  
60

- 1  
2  
3 603 12. Cook, Levinson AJ, Garside S, et al. Internet-based learning in the health professions: a meta-  
4 604 analysis. *Journal of the American Medical Association* 2008;300(10):1181-96. doi:  
5 605 10.1001/jama.300.10.1181  
6  
7 606 13. Steenbergen-Hu S, Cooper H. A meta-analysis of the effectiveness of intelligent tutoring  
8 607 systems on college students' academic learning. *Journal of Educational Psychology*  
9 608 2014;106(2):331-47. doi: 10.1037/a0034752  
10  
11 609 14. Steenbergen-Hu S, Cooper H. A meta-analysis of the effectiveness of intelligent tutoring  
12 610 systems on K-12 students' mathematical learning. *Journal of Educational Psychology*  
13 611 2013;105(4):970-87. doi: 1037/a0032447  
14  
15 612 15. Kulik JA, Fletcher JD. Effectiveness of intelligent tutoring systems: A meta-analytic review.  
16 613 *Review of Educational Research* 2015;86(1):42-78. doi: 10.3102/0034654315581420  
17  
18 614 16. Ma W, Adesope OO, Nesbit JC, et al. Intelligent Tutoring Systems and Learning Outcomes:  
19 615 A Meta-Analysis. *Journal of Educational Psychology* 2014;106(4):901-18. doi:  
20 616 10.1037/a0037123  
21  
22 617 17. Strengers Y, Moloney S, Maller C, et al. Beyond behaviour change: practical applications of  
23 618 social practice theory in behaviour change programmes. In: Strengers Y, Maller C, eds.  
24 619 *Social Practices, Interventions and Sustainability*. New York, NY: Routledge 2014:63-77.  
25  
26 620 18. Nesbit JC, Adesope OO, Liu Q, et al. How Effective are Intelligent Tutoring Systems in  
27 621 Computer Science Education? IEEE 14th International Conference on Advanced Learning  
28 622 Technologies (ICALT). Athens, Greece, 2014.  
29  
30 623 19. Evens M, Michael J. One-on-one tutoring by humans and computers. Mahwah, NJ:  
31 624 Psychology Press 2006.  
32  
33 625 20. Cochrane Effective Practice and Organisation of Care (EPOC). EPOC resources for review  
34 626 authors 2017 [Available from: [http://epoc.cochrane.org/resources/epoc-resources-review-](http://epoc.cochrane.org/resources/epoc-resources-review-authors)  
35 627 [authors](http://epoc.cochrane.org/resources/epoc-resources-review-authors).]  
36  
37 628 21. Moher D, Shamseer L, Clarke M, et al. Preferred reporting items for systematic review and  
38 629 meta-analysis protocols (PRISMA-P) 2015 statement. *Systematic Reviews* 2015;4(1) doi:  
39 630 10.1186/2046-4053-4-1  
40  
41 631 22. Fontaine G, Cossette S, Maheu-Cadotte MA, et al. Effectiveness of Adaptive E-Learning  
42 632 Environments on Knowledge, Competence, and Behavior in Health Professionals and  
43 633 Students: A Protocol for a Systematic Review and Meta-Analysis. *JMIR Research*  
44 634 *Protocols* 2017;6(7):e128. doi: 10.2196/resprot.8085  
45  
46 635 23. Fontaine G, Cossette S, Maheu-Cadotte MA, et al. Effectiveness of adaptive E-Learning  
47 636 environments on knowledge, competence and behaviour in health professionals and  
48 637 students: A systematic review protocol. *Canadian Journal of Cardiology*  
49 638 2017;33(10):S226-S27. doi: 10.1016/j.cjca.2017.07.465  
50  
51  
52  
53  
54  
55  
56  
57  
58  
59  
60

- 1  
2  
3 639 24. Moja L, Moschetti I, Cinquini M, et al. Clinical evidence continuous medical education: a  
4 640 randomised educational trial of an open access e-learning program for transferring  
5 641 evidence-based information–ICEKUBE (Italian Clinical Evidence Knowledge Utilization  
6 642 Behaviour Evaluation)–study protocol. *Implementation Science* 2008;3(1):37. doi:  
7 643 10.1186/1748-5908-3-37  
8  
9  
10 644 25. **Miller GE**. The assessment of clinical skills/competence/performance. *Academic Medicine*  
11 645 1990(Suppl 2):S63-S67.  
12  
13 646 26. EPOC Cochrane Review Group. What study designs should be included in an EPOC review  
14 647 and what should they be called? 2014 [Available from:  
15 648 [https://epoc.cochrane.org/sites/epoc.cochrane.org/files/public/uploads/EPOC%20Study%  
16 649 20Designs%20About.pdf2017](https://epoc.cochrane.org/sites/epoc.cochrane.org/files/public/uploads/EPOC%20Study%20Designs%20About.pdf2017).  
17  
18  
19 650 27. EPOC Cochrane Review Group. Data extraction and management: EPOC Resources for  
20 651 review authors Oslo, Norway: Norwegian Knowledge Centre for the Health Services;  
21 652 2013 [Available from: <http://epoc.cochrane.org/epoc-specific-resources-review-authors>.  
22  
23 653 28. Higgins JP, Thompson SG, Deeks JJ, et al. Measuring inconsistency in meta-analyses. *BMJ*  
24 654 2003;327(7414):557-60. doi: 10.1136/bmj.327.7414.557  
25  
26 655 29. Higgins JPT, Green S. Cochrane Handbook for Systematic Reviews of Interventions Version  
27 656 5.1.0.: The Cochrane Collaboration 2011.  
28  
29  
30 657 30. Guyatt GH, Oxman AD, Vist GE, et al. GRADE: an emerging consensus on rating quality of  
31 658 evidence and strength of recommendations. *BMJ: British Medical Journal*  
32 659 2008;336(7650):924-26. doi: 10.1136/bmj.39489.470347.AD  
33  
34 660 31. Crowley RS, Legowski E, Medvedeva O, et al. Evaluation of an intelligent tutoring system in  
35 661 pathology: effects of external representation on performance gains, metacognition, and  
36 662 acceptance. *J Am Med Inform Assoc* 2007;14(2):182-90. doi: 10.1197/jamia.M2241  
37 663 [published Online First: 2007/01/11]  
38  
39  
40 664 32. El Saadawi GM, Azevedo R, Castine M, et al. Factors affecting feeling-of-knowing in a  
41 665 medical intelligent tutoring system: the role of immediate feedback as a metacognitive  
42 666 scaffold. *Adv Health Sci Educ Theory Pract* 2010;15(1):9-30. doi: 10.1007/s10459-009-  
43 667 9162-6 [published Online First: 2009/05/13]  
44  
45 668 33. El Saadawi GM, Tseytlin E, Legowski E, et al. A natural language intelligent tutoring system  
46 669 for training pathologists: implementation and evaluation. *Adv Health Sci Educ Theory*  
47 670 *Pract* 2008;13(5):709-22. doi: 10.1007/s10459-007-9081-3 [published Online First:  
48 671 2007/10/16]  
49  
50  
51 672 34. Feyzi-Behnagh R, Azevedo R, Legowski E, et al. Metacognitive scaffolds improve self-  
52 673 judgments of accuracy in a medical intelligent tutoring system. *Instr Sci* 2014;42(2):159-  
53 674 81. doi: 10.1007/s11251-013-9275-4 [published Online First: 2014/02/18]  
54  
55  
56  
57  
58  
59  
60

- 1  
2  
3 675 35. Munoz DC, Ortiz A, Gonzalez C, et al. Effective e-learning for health professional and  
4 676 medical students: the experience with SIAS-Intelligent Tutoring System. *Stud Health*  
5 677 *Technol Inform* 2010;156:89-102. [published Online First: 2010/06/15]  
6  
7 678 36. Romito BT, Krasne S, Kellman PJ, et al. The impact of a perceptual and adaptive learning  
8 679 module on transoesophageal echocardiography interpretation by anaesthesiology  
9 680 residents. *Br J Anaesth* 2016;117(4):477-81. doi: 10.1093/bja/aew295 [published Online  
10 681 First: 2017/01/13]  
11  
12  
13 682 37. Woo CW, Evens MW, Freedman R, et al. An intelligent tutoring system that generates a  
14 683 natural language dialogue using dynamic multi-level planning. *Artificial intelligence in*  
15 684 *medicine* 2006;38(1):25-46. doi: 10.1016/j.artmed.2005.10.004 [published Online First:  
16 685 2005/12/15]  
17  
18  
19 686 38. Wong MS, Krasne S. Use of a Perceptual Adaptive Learning Module Results in Improved  
20 687 Accuracy and Fluency of Fetal Heart Rate Categorization by Medical Students. *American*  
21 688 *Journal of Obstetrics & Gynecology* 2017;216(1):S491-S92. doi:  
22 689 10.1016/j.ajog.2016.11.768  
23  
24 690 39. Alevan V, Kay J, Mostow J, eds. Use of a medical ITS improves reporting performance  
25 691 among community pathologists. *Intelligent Tutoring Systems*; 2010; Pittsburgh, PA.  
26 692 Springer Berlin/Heidelberg.  
27  
28  
29 693 40. Hayes-Roth B, Saker R, Amano K. Automating individualized coaching and authentic role-  
30 694 play practice for brief intervention training. *Methods of Information in Medicine*  
31 695 2010;49(3):406-11.  
32  
33 696 41. Samulski TD, Taylor LA, La T, et al. The utility of adaptive eLearning in cervical  
34 697 cytopathology education. *Cancer Cytopathology* 2017:1-7. doi: 10.1002/cncy.21942  
35  
36 698 42. Van Es SL, Kumar RK, Pryor WM, et al. Cytopathology whole slide images and adaptive  
37 699 tutorials for senior medical students: a randomized crossover trial. *Diagn Pathol*  
38 700 2016;11:1. doi: 10.1186/s13000-016-0452-z [published Online First: 2016/01/10]  
39  
40  
41 701 43. Wong V, Smith AJ, Hawkins NJ, et al. Adaptive Tutorials Versus Web-Based Resources in  
42 702 Radiology: A Mixed Methods Comparison of Efficacy and Student Engagement. *Acad*  
43 703 *Radiol* 2015;22(10):1299-307. doi: 10.1016/j.acra.2015.07.002 [published Online First:  
44 704 2015/08/22]  
45  
46 705 44. Cook DA, Beckman TJ, Thomas KG, et al. Adapting web-based instruction to residents'  
47 706 knowledge improves learning efficiency: a randomized controlled trial. *J Gen Intern Med*  
48 707 2008;23(7):985-90. doi: 10.1007/s11606-008-0541-0 [published Online First:  
49 708 2008/07/10]  
50  
51  
52 709 45. Van Es SL, Kumar RK, Pryor WM, et al. Cytopathology whole slide images and adaptive  
53 710 tutorials for postgraduate pathology trainees: a randomized crossover trial. *Hum Pathol*  
54 711 2015;46(9):1297-305. doi: 10.1016/j.humpath.2015.05.009 [published Online First:  
55 712 2015/06/22]  
56  
57  
58  
59  
60

- 1  
2  
3 713 46. Morente L, Morales-Asencio JM, Veredas F. Effectiveness of an e-learning tool for education  
4 714 on pressure ulcer evaluation. International Conference on Health Informatics. Barcelona,  
5 715 Spain, 2013:155-60.  
6  
7 716 47. Adaptive Perceptual Learning in Electrocardiography: The Synergy of Passive and Active  
8 717 Classification. 37th Annual Conference of the Cognitive Science Society; 2015;  
9 718 Pasadena, CA.  
10  
11 719 48. Corbett A, Kauffman L, Maclaren B, et al. A Cognitive Tutor for genetics problem solving:  
12 720 Learning gains and student modeling. *Journal of Educational Computing Research*  
13 721 2010;42(2):219-39. doi: 10.2190/EC.42.2.e  
14  
15 722 49. Cohen J. Statistical power analysis for the behavioral sciences. Hillsdale, NJ: L. Erlbaum  
16 723 Associates 1988.  
17  
18 724 50. Cook DA, Hatala R, Brydges R, et al. Technology-enhanced simulation for health professions  
19 725 education. *Journal of the American Medical Association* 2011;306(9):978-88. doi:  
20 726 10.1001/jama.2011.1234  
21  
22 727 51. Liu Q, Peng W, Zhang F, et al. The effectiveness of blended learning in health professions:  
23 728 systematic review and meta-analysis. *Journal of Medical Internet Research*  
24 729 2016;18(1):e2. doi: 10.2196/jmir.4807  
25  
26 730 52. Voutilainen A, Saaranen T, Sormunen M. Conventional vs. e-learning in nursing education:  
27 731 A systematic review and meta-analysis. *Nurse Education Today* 2017;50:97-103. doi:  
28 732 10.1016/j.nedt.2016.12.020  
29  
30  
31  
32  
33 733  
34  
35  
36  
37  
38  
39  
40  
41  
42  
43  
44  
45  
46  
47  
48  
49  
50  
51  
52  
53  
54  
55  
56  
57  
58  
59  
60

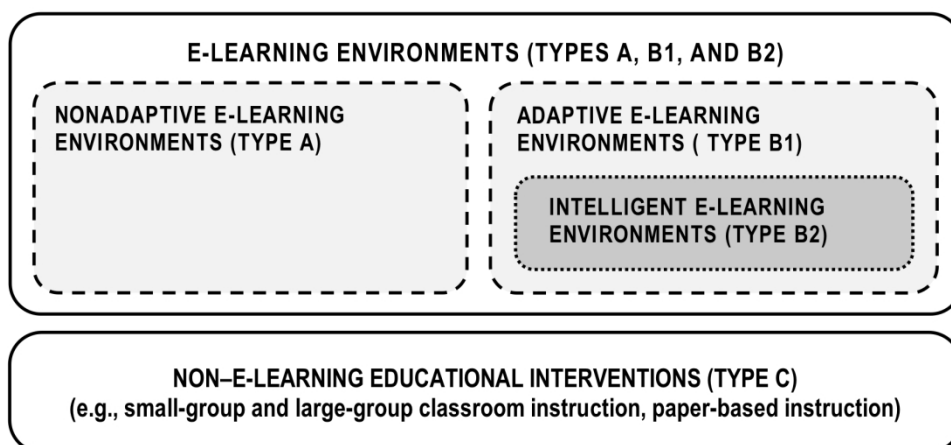

Figure 1. Types of educational interventions examined in the context of this review.

163x80mm (300 x 300 DPI)



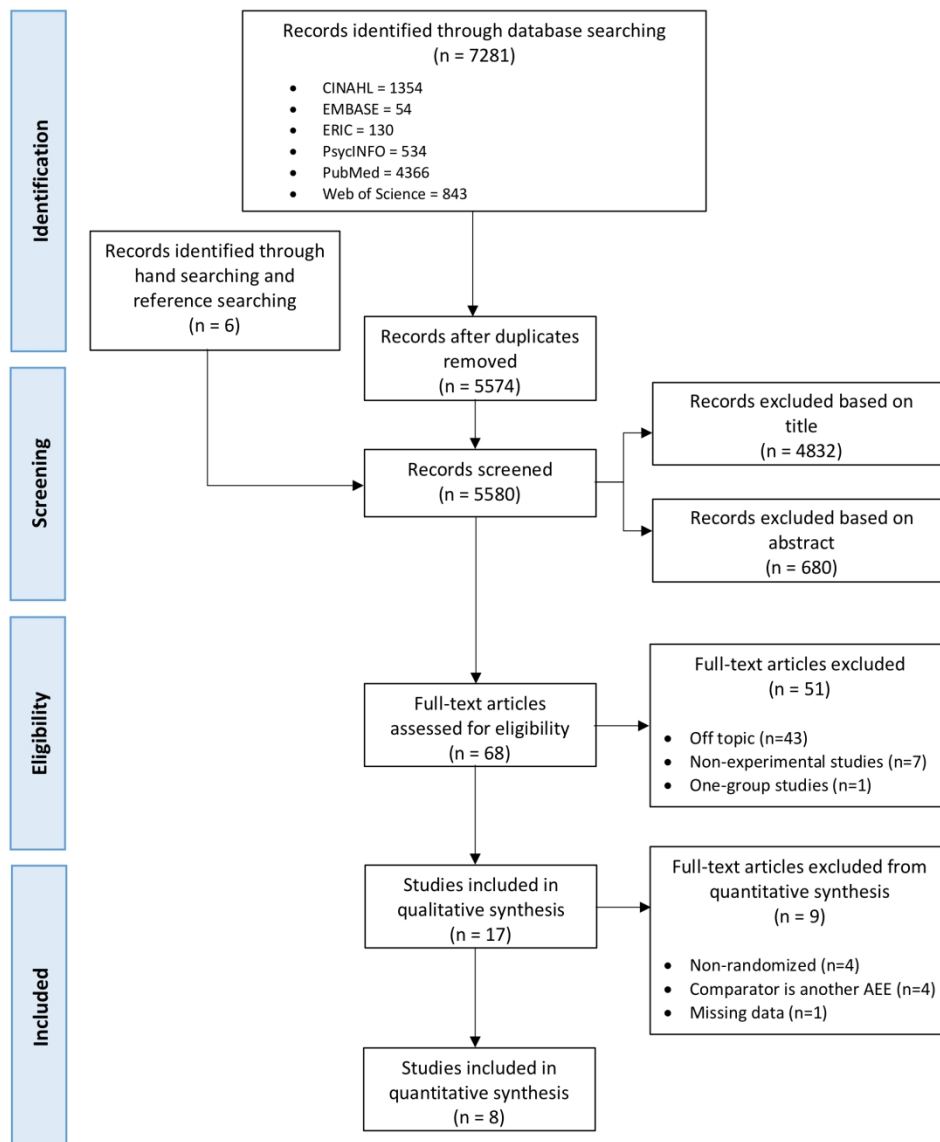

Figure 2. PRISMA study flow diagram.

190x229mm (300 x 300 DPI)

|                    | Random sequence generation (selection bias) | Allocation concealment (selection bias) | Similarity of baseline outcome measurements | Similarity of baseline characteristics | Blinding of participants and personnel (performance bias) | Blinding of outcome assessment (detection bias) | Incomplete outcome data (attrition bias) | Selective reporting (reporting bias) | Measures against contamination? |
|--------------------|---------------------------------------------|-----------------------------------------|---------------------------------------------|----------------------------------------|-----------------------------------------------------------|-------------------------------------------------|------------------------------------------|--------------------------------------|---------------------------------|
| Cook 2008          | +                                           | +                                       | ?                                           | +                                      | +                                                         | +                                               | +                                        | +                                    | +                               |
| Crowley 2007       | +                                           | ?                                       | +                                           | ?                                      | ?                                                         | +                                               | +                                        | +                                    | +                               |
| Crowley 2010       | +                                           | ?                                       | +                                           | +                                      | ?                                                         | +                                               | +                                        | +                                    | +                               |
| El Saadawi 2008    | +                                           | ?                                       | +                                           | ?                                      | ?                                                         | ?                                               | ?                                        | +                                    | +                               |
| El Saadawi 2010    | +                                           | ?                                       | +                                           | ?                                      | ?                                                         | +                                               | ?                                        | +                                    | +                               |
| Feyzi-Behnagh 2014 | +                                           | ?                                       | +                                           | ?                                      | ?                                                         | +                                               | ?                                        | +                                    | +                               |
| Hayes-Roth 2010    | +                                           | ?                                       | +                                           | ?                                      | ?                                                         | +                                               | +                                        | +                                    | +                               |
| Morente 2013       | +                                           | ?                                       | +                                           | +                                      | ?                                                         | +                                               | +                                        | +                                    | +                               |
| Munoz 2010         | +                                           | +                                       | +                                           | +                                      | ?                                                         | +                                               | ?                                        | +                                    | +                               |
| Romito 2016        | +                                           | +                                       | +                                           | ?                                      | ?                                                         | +                                               | +                                        | +                                    | +                               |
| Samulski 2017      | +                                           | ?                                       | +                                           | +                                      | ?                                                         | +                                               | ?                                        | +                                    | +                               |
| Thai 2015          | +                                           | ?                                       | +                                           | ?                                      | ?                                                         | +                                               | ?                                        | +                                    | +                               |
| Van Es 2015        | +                                           | ?                                       | +                                           | +                                      | ?                                                         | +                                               | +                                        | +                                    | +                               |
| Van Es 2016        | +                                           | ?                                       | +                                           | +                                      | ?                                                         | +                                               | +                                        | +                                    | +                               |
| Wong 2015          | +                                           | ?                                       | ?                                           | +                                      | ?                                                         | +                                               | +                                        | ?                                    | +                               |
| Wong 2017          | +                                           | +                                       | +                                           | ?                                      | ?                                                         | +                                               | ?                                        | +                                    | +                               |
| Woo 2006           | ?                                           | ?                                       | +                                           | ?                                      | ?                                                         | ?                                               | +                                        | +                                    | +                               |

Figure 3. Risk of bias summary: review authors' judgements about each risk of bias item for each included study.

106x228mm (300 x 300 DPI)

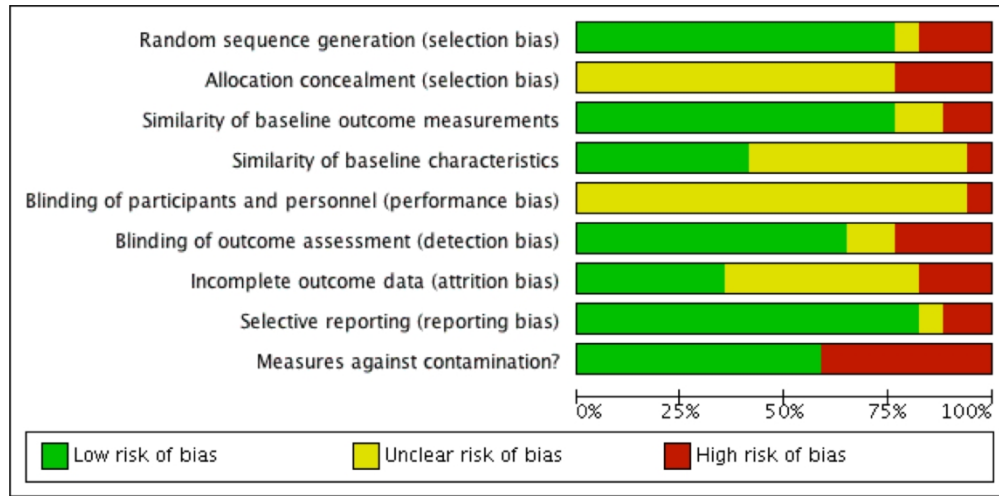

Figure 4. Risk of bias graph: review authors' judgements about each risk of bias item presented as percentages across all included studies.

205x101mm (300 x 300 DPI)

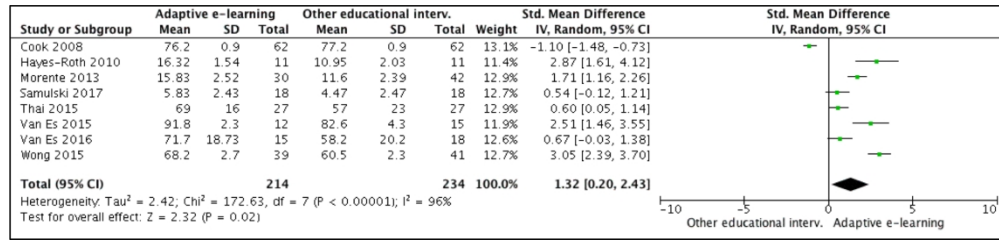

Figure 5. Forest plot #1: meta-analysis of the effectiveness of adaptive e-learning environments versus other educational interventions in improving all learning outcomes.

242x56mm (300 x 300 DPI)

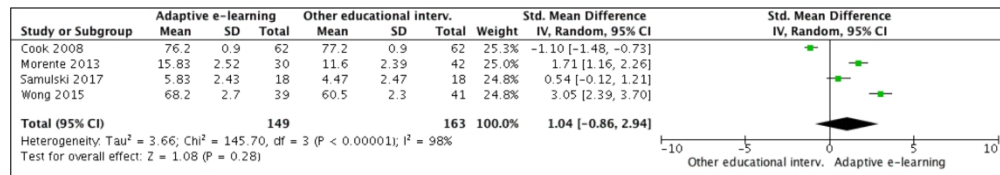

Figure 6. Forest plot #2: meta-analysis of the effectiveness of adaptive e-learning environments versus other educational interventions in improving knowledge.

247x42mm (300 x 300 DPI)

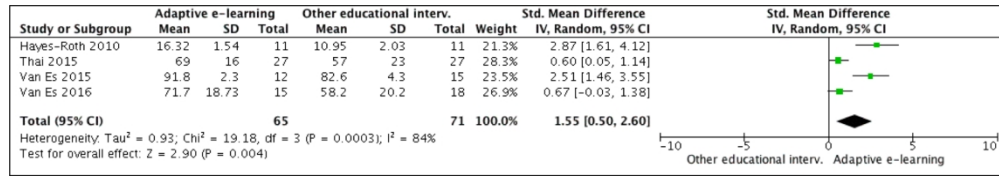

Figure 7. Forest plot #3: meta-analysis of the effectiveness of adaptive e-learning environments versus other educational interventions in improving competence.

242x41mm (300 x 300 DPI)

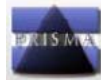

# PRISMA 2009 Checklist

| Section/topic                      | #  | Checklist item                                                                                                                                                                                                                                                                                              | Reported on page #   |
|------------------------------------|----|-------------------------------------------------------------------------------------------------------------------------------------------------------------------------------------------------------------------------------------------------------------------------------------------------------------|----------------------|
| <b>TITLE</b>                       |    |                                                                                                                                                                                                                                                                                                             |                      |
| Title                              | 1  | Identify the report as a systematic review, meta-analysis, or both.                                                                                                                                                                                                                                         | 1                    |
| <b>ABSTRACT</b>                    |    |                                                                                                                                                                                                                                                                                                             |                      |
| Structured summary                 | 2  | Provide a structured summary including, as applicable: background; objectives; data sources; study eligibility criteria, participants, and interventions; study appraisal and synthesis methods; results; limitations; conclusions and implications of key findings; systematic review registration number. | 4-5                  |
| <b>INTRODUCTION</b>                |    |                                                                                                                                                                                                                                                                                                             |                      |
| Rationale                          | 3  | Describe the rationale for the review in the context of what is already known.                                                                                                                                                                                                                              | 7-9                  |
| Objectives                         | 4  | Provide an explicit statement of questions being addressed with reference to participants, interventions, comparisons, outcomes, and study design (PICOS).                                                                                                                                                  | 9-10                 |
| <b>METHODS</b>                     |    |                                                                                                                                                                                                                                                                                                             |                      |
| Protocol and registration          | 5  | Indicate if a review protocol exists, if and where it can be accessed (e.g., Web address), and, if available, provide registration information including registration number.                                                                                                                               | 10                   |
| Eligibility criteria               | 6  | Specify study characteristics (e.g., PICOS, length of follow-up) and report characteristics (e.g., years considered, language, publication status) used as criteria for eligibility, giving rationale.                                                                                                      | 10-11                |
| Information sources                | 7  | Describe all information sources (e.g., databases with dates of coverage, contact with study authors to identify additional studies) in the search and date last searched.                                                                                                                                  | 11                   |
| Search                             | 8  | Present full electronic search strategy for at least one database, including any limits used, such that it could be repeated.                                                                                                                                                                               | Supplementary File 2 |
| Study selection                    | 9  | State the process for selecting studies (i.e., screening, eligibility, included in systematic review, and, if applicable, included in the meta-analysis).                                                                                                                                                   | 11                   |
| Data collection process            | 10 | Describe method of data extraction from reports (e.g., piloted forms, independently, in duplicate) and any processes for obtaining and confirming data from investigators.                                                                                                                                  | 11-12                |
| Data items                         | 11 | List and define all variables for which data were sought (e.g., PICOS, funding sources) and any assumptions and simplifications made.                                                                                                                                                                       | 12                   |
| Risk of bias in individual studies | 12 | Describe methods used for assessing risk of bias of individual studies (including specification of whether this was done at the study or outcome level), and how this information is to be used in any data synthesis.                                                                                      | 13                   |
| Summary measures                   | 13 | State the principal summary measures (e.g., risk ratio, difference in means).                                                                                                                                                                                                                               | 13-14                |
| Synthesis of results               | 14 | Describe the methods of handling data and combining results of studies, if done, including measures of consistency (e.g., $I^2$ ) for each meta-analysis.                                                                                                                                                   | 13-14                |

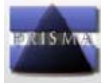

# PRISMA 2009 Checklist

| Section/topic                 | #  | Checklist item                                                                                                                                                                                           | Reported on page # |
|-------------------------------|----|----------------------------------------------------------------------------------------------------------------------------------------------------------------------------------------------------------|--------------------|
| Risk of bias across studies   | 15 | Specify any assessment of risk of bias that may affect the cumulative evidence (e.g., publication bias, selective reporting within studies).                                                             | 13                 |
| Additional analyses           | 16 | Describe methods of additional analyses (e.g., sensitivity or subgroup analyses, meta-regression), if done, indicating which were pre-specified.                                                         | 14                 |
| <b>RESULTS</b>                |    |                                                                                                                                                                                                          |                    |
| Study selection               | 17 | Give numbers of studies screened, assessed for eligibility, and included in the review, with reasons for exclusions at each stage, ideally with a flow diagram.                                          | 15                 |
| Study characteristics         | 18 | For each study, present characteristics for which data were extracted (e.g., study size, PICOS, follow-up period) and provide the citations.                                                             | 18                 |
| Risk of bias within studies   | 19 | Present data on risk of bias of each study and, if available, any outcome level assessment (see item 12).                                                                                                | 27                 |
| Results of individual studies | 20 | For all outcomes considered (benefits or harms), present, for each study: (a) simple summary data for each intervention group (b) effect estimates and confidence intervals, ideally with a forest plot. | 28-30              |
| Synthesis of results          | 21 | Present results of each meta-analysis done, including confidence intervals and measures of consistency.                                                                                                  | 28-30              |
| Risk of bias across studies   | 22 | Present results of any assessment of risk of bias across studies (see Item 15).                                                                                                                          | 28                 |
| Additional analysis           | 23 | Give results of additional analyses, if done (e.g., sensitivity or subgroup analyses, meta-regression [see Item 16]).                                                                                    | N/A                |
| <b>DISCUSSION</b>             |    |                                                                                                                                                                                                          |                    |
| Summary of evidence           | 24 | Summarize the main findings including the strength of evidence for each main outcome; consider their relevance to key groups (e.g., healthcare providers, users, and policy makers).                     | 30                 |
| Limitations                   | 25 | Discuss limitations at study and outcome level (e.g., risk of bias), and at review-level (e.g., incomplete retrieval of identified research, reporting bias).                                            |                    |
| Conclusions                   | 26 | Provide a general interpretation of the results in the context of other evidence, and implications for future research.                                                                                  |                    |
| <b>FUNDING</b>                |    |                                                                                                                                                                                                          |                    |
| Funding                       | 27 | Describe sources of funding for the systematic review and other support (e.g., supply of data); role of funders for the systematic review.                                                               | N/A                |

From: Moher D, Liberati A, Tetzlaff J, Altman DG, The PRISMA Group (2009). Preferred Reporting Items for Systematic Reviews and Meta-Analyses: The PRISMA Statement. PLoS Med 6(7): e1000097. doi:10.1371/journal.pmed1000097

For more information, visit: [www.prisma-statement.org](http://www.prisma-statement.org).



## Supplementary File 2 – Search Strategy for PubMed

**PubMed – 17 avril 2017**

1. ((Adaptive[TIAB] OR individualized [TIAB] OR personalized[TIAB] OR Tailored[TIAB]) AND (elearning[TIAB] OR learning[TIAB] OR Instruction[TIAB] OR "web-based instruction"[TIAB] OR computer-based instruction[TIAB] OR computer-based tutoring[TIAB] OR education[TIAB] OR tutorial[TIAB] OR tutorials[TIAB])) OR Intelligent tutoring system[TIAB] OR Intelligent tutoring systems[TIAB]
2. "Computer-Assisted Instruction"[MH]
3. #1 OR #2
4. Health Personnel\*[TIAB] OR Health professional\*[TIAB] OR Health care profession\*[TIAB] OR Healthcare profession\*[TIAB] OR Medical student\*[TIAB] OR Medical assistant\*[TIAB] OR health worker\*[TIAB] OR Audiologist\*[TIAB] OR Chiropractor\*[TIAB] OR Dentist[TIAB] OR Dentists[TIAB] OR Dietitian\*[TIAB] OR Dermatolog\*[TIAB] OR endocrinologist\*[TIAB] OR Gastroenterolog\*[TIAB] OR Gynecolog\*[TIAB] OR Radiolog\*[TIAB] OR Medical Staff[TIAB] OR Midwife\*[TIAB] OR nutritionist\*[TIAB] OR Nurse[TIAB] OR Nurses[TIAB] OR Optometrist\*[TIAB] OR Occupational Therapist\*[TIAB] OR Patholog\*[TIAB] OR Paramedic[TIAB] OR Paediatric[TIAB] OR pediatrician\*[TIAB] OR Paediatrician\*[TIAB] OR pediatricist\*[TIAB] OR pediatric[TIAB] OR Pharmacist\*[TIAB] OR Pharmaconomist\*[TIAB] OR Pharmacologist\*[TIAB] OR Pharmacy technician\*[TIAB] OR Phlebotomist\*[TIAB] OR Physician OR Podiatrist\*[TIAB] OR Psychologist\*[TIAB] OR Psychotherapist\*[TIAB] OR psychiatrist\*[TIAB] OR Physical therapist\*[TIAB] OR physiotherapist\*[TIAB] OR Respiratory therapist\*[TIAB] OR Surgeon\*[TIAB] OR Clinician\*[TIAB] OR Cardiologist\*[TIAB] OR Emergency medical technician\*[TIAB] OR emergency doctor\*[TIAB] OR emergentologist\*[TIAB] OR clinical officer\*[TIAB] OR Community health worker\*[TIAB] OR Radiographer\*[TIAB] OR Surgical technologist\*[TIAB] OR Radiotherapist\*[TIAB] OR Anesthetist\*[TIAB] OR Resident[TIAB] OR residents[TIAB]
5. "Health Personnel"[MH] OR "Students, Premedical"[MH] OR "Students, Medical"[MH] OR "Students, Nursing"[Mesh]
6. "Education, Premedical"[MH] OR "Education, Medical"[MH] OR "Education, Nursing"[MH] OR "Education, Pharmacy"[MH] OR "Education, Public Health Professional"[MH] OR "Clinical Clerkship"[MH]
7. #4 OR #5 OR 6
8. knowledge\*[TIAB] OR Aptitude\*[TIAB] OR accuracy[TIAB] OR impact\*[TIAB] OR skill\*[TIAB] OR performance\*[TIAB] OR Learning outcome\*[TIAB] OR effectiveness[TIAB] OR efficacy[TIAB] OR improvement\*[TIAB] OR Innovative\*[TIAB] OR innovation\*[TIAB] OR randomised controlled trial[TIAB] OR randomized controlled trial[TIAB]
9. "Clinical Competence"[MH] "Quality Improvement"[MH] OR "Learning Curve"[MH] OR Knowledge [MH] OR "randomized controlled trial"[PT]
10. #8 OR 9
11. #3 AND #7 AND #10
12. (english[LA] OR french[LA]) AND 2005:2017[DP]
13. #11 AND #12

**Résultats: 4 375**

Supplementary File 3 – Summary of the quality of evidence

| Certainty assessment |                   |                        |                      |              |                      |                      | No of patients                   |                                 | Effect                                            | Certainty        | Importance |
|----------------------|-------------------|------------------------|----------------------|--------------|----------------------|----------------------|----------------------------------|---------------------------------|---------------------------------------------------|------------------|------------|
| No of studies        | Study design      | Risk of bias           | Inconsistency        | Indirectness | Imprecision          | Other considerations | Adaptive e-Learning Intervention | Other educational interventions | Absolute (95% CI)                                 |                  |            |
| Knowledge            |                   |                        |                      |              |                      |                      |                                  |                                 |                                                   |                  |            |
| 4                    | randomised trials | serious <sup>a,b</sup> | serious <sup>c</sup> | not serious  | serious <sup>d</sup> | none                 | 149                              | 163                             | SMD 1.04 SD higher<br>(0.86 lower to 2.94 higher) | ⊕○○○<br>VERY LOW | IMPORTANT  |
| Competence           |                   |                        |                      |              |                      |                      |                                  |                                 |                                                   |                  |            |
| 4                    | randomised trials | serious <sup>e</sup>   | not serious          | not serious  | serious <sup>f</sup> | none                 | 65                               | 71                              | SMD 1.55 SD higher<br>(0.5 higher to 2.6 higher)  | ⊕⊕○○<br>LOW      | CRITICAL   |

CI: Confidence interval; SMD: Standardised mean difference

Explanations

- a. The four studies were scored at unclear or high risk of bias regarding allocation concealment. Thus, there is no guarantee that participants' allocation to each group didn't influence the delivery of the intervention.
- b. The risk of bias for similarity of baseline measurements was unclear for 2 studies. Thus, groups in these studies could be disproportionate and the distribution may not be normal since sample size is generally small.
- c. The individual confidence intervals of the four studies almost do not touch.
- d. No author mentioned in these four studies that the measurement instrument for knowledge was validated, and no single instrument is used multiple times. According to sample size calculations, sample size was sufficient in 3 studies.
- e. There was a high risk of contamination bias in 2 studies. Incomplete outcome data for 2, potentially 3 studies. Participants that were more motivated that completed the studies may have induced a bias in the results.
- f. One underpowered study, according to authors, and 2 studies for which the sample size calculation is not mentioned. It is not mentioned in the measurement instruments were validated in the 4 studies, and no single instrument is used multiple times.

# BMJ Open

## Efficacy of adaptive e-learning for health professionals and students: a systematic review and meta-analysis

|                                 |                                                                                                                                                                                                                                                                                                                                                                                                                                                                                                                                                                                                                                                                                                                                                                                                                                                                                                                                                                                                                                                       |
|---------------------------------|-------------------------------------------------------------------------------------------------------------------------------------------------------------------------------------------------------------------------------------------------------------------------------------------------------------------------------------------------------------------------------------------------------------------------------------------------------------------------------------------------------------------------------------------------------------------------------------------------------------------------------------------------------------------------------------------------------------------------------------------------------------------------------------------------------------------------------------------------------------------------------------------------------------------------------------------------------------------------------------------------------------------------------------------------------|
| Journal:                        | <i>BMJ Open</i>                                                                                                                                                                                                                                                                                                                                                                                                                                                                                                                                                                                                                                                                                                                                                                                                                                                                                                                                                                                                                                       |
| Manuscript ID                   | bmjopen-2018-025252.R1                                                                                                                                                                                                                                                                                                                                                                                                                                                                                                                                                                                                                                                                                                                                                                                                                                                                                                                                                                                                                                |
| Article Type:                   | Research                                                                                                                                                                                                                                                                                                                                                                                                                                                                                                                                                                                                                                                                                                                                                                                                                                                                                                                                                                                                                                              |
| Date Submitted by the Author:   | 25-Mar-2019                                                                                                                                                                                                                                                                                                                                                                                                                                                                                                                                                                                                                                                                                                                                                                                                                                                                                                                                                                                                                                           |
| Complete List of Authors:       | Fontaine, Guillaume; University of Montreal, Faculty of Nursing; Montreal Heart Institute, Research Center<br>Cossette, Sylvie ; University of Montreal, Faculty of Nursing; Montreal Heart Institute, Research Center<br>Maheu-Cadotte, Marc-André; University of Montreal, Faculty of Nursing; Montreal Heart Institute, Research Center<br>Mailhot, Tanya; Northeastern University, Bouve College of Health Sciences; Montreal Heart Institute, Research Center<br>Deschênes, Marie-France; University of Montreal, Faculty of Nursing; Center for Innovation in Nursing Education<br>Mathieu-Dupuis, Gabrielle; University of Montreal, School of Librarianship and Information Science<br>Côté, José; University of Montreal, Faculty of Nursing; University of Montreal Hospital Centre, Research Center<br>Gagnon, Marie-Pierre; Laval University, Faculty of Nursing; CHU de Québec-Université Laval, Research Center<br>Dubé, Veronique; University of Montreal, Faculty of Nursing; University of Montreal Hospital Centre, Research Center |
| <b>Primary Subject Heading</b>: | Medical education and training                                                                                                                                                                                                                                                                                                                                                                                                                                                                                                                                                                                                                                                                                                                                                                                                                                                                                                                                                                                                                        |
| Secondary Subject Heading:      | Health services research                                                                                                                                                                                                                                                                                                                                                                                                                                                                                                                                                                                                                                                                                                                                                                                                                                                                                                                                                                                                                              |
| Keywords:                       | MEDICAL EDUCATION & TRAINING, COMPUTER-ASSISTED INSTRUCTION, ADAPTIVE E-LEARNING ENVIRONMENTS, META-ANALYSIS, SYSTEMATIC REVIEW                                                                                                                                                                                                                                                                                                                                                                                                                                                                                                                                                                                                                                                                                                                                                                                                                                                                                                                       |
|                                 |                                                                                                                                                                                                                                                                                                                                                                                                                                                                                                                                                                                                                                                                                                                                                                                                                                                                                                                                                                                                                                                       |

SCHOLARONE™  
Manuscripts

# 1 Efficacy of adaptive e-learning for health professionals and 2 students: a systematic review and meta-analysis

3  
4 **Guillaume Fontaine** <sup>a, b\*</sup>, **Sylvie Cossette** <sup>a, b</sup>, **Marc-André Maheu-Cadotte** <sup>a, b, c</sup>,  
5 **Tanya Mailhot** <sup>a, b, d</sup>, **Marie-France Deschênes** <sup>a, e</sup>, **Gabrielle Mathieu-Dupuis** <sup>f</sup>, **José Côté** <sup>a, c</sup>,  
6 **Marie-Pierre Gagnon** <sup>g, h</sup>, **Véronique Dubé** <sup>a, c</sup>

7  
8 <sup>a</sup> Faculty of Nursing, Université de Montréal, Montréal, Québec, Canada

9 <sup>b</sup> Montreal Heart Institute Research Center, Montréal, Québec, Canada

10 <sup>c</sup> Centre Hospitalier de l'Université de Montréal Research Center, Montréal, Québec, Canada

11 <sup>d</sup> Faculty of Medicine, Université de Montréal, Montréal, Québec, Canada

12 <sup>e</sup> Center for Innovation in Nursing Education, Montréal, Québec, Canada

13 <sup>f</sup> School of Librarianship and Information Science, Université de Montréal, Montreal, Québec,  
14 Canada

15 <sup>g</sup> Faculty of Nursing, Université Laval, Québec, Québec, Canada

16 <sup>h</sup> CHU de Québec Research Center, Québec, Québec, Canada

17  
18 \* Corresponding author: Montreal Heart Institute Research Center, 5000 Belanger Street, H1T  
19 1C8, Room S-2490, Montreal, QC, Canada. Tel: 1-514-376-3330, x3069. E-mail:  
20 [guillaume.fontaine@umontreal.ca](mailto:guillaume.fontaine@umontreal.ca)

21  
22 Word count (excluding title page, abstract, references, figures, and tables): 5,823 words

1  
2  
3 23  
45 24 **COPYRIGHT**  
6  
7

8 25 The Corresponding Author has the right to grant on behalf of all authors and does grant on  
9  
10 26 behalf of all authors, a worldwide license to the Publishers and its licensees in perpetuity, in all  
11  
12 27 forms, formats and media (whether known now or created in the future), to i) publish, reproduce,  
13  
14 28 distribute, display and store the Contribution, ii) translate the Contribution into other languages,  
15  
16 29 create adaptations, reprints, include within collections and create summaries, extracts and/or,  
17  
18 30 abstracts of the Contribution, iii) create any other derivative work(s) based on the Contribution,  
19  
20 31 iv) to exploit all subsidiary rights in the Contribution, v) the inclusion of electronic links from the  
21  
22 32 Contribution to third party material where-ever it may be located; and, vi) license any third party  
23  
24 33 to do any or all of the above.  
25  
26  
27  
28  
29

30 34 **DECLARATION OF COMPETING INTERESTS**  
31  
32

33 35 All authors have completed the ICMJE uniform disclosure form at  
34  
35 36 [www.icmje.org/coi\\_disclosure.pdf](http://www.icmje.org/coi_disclosure.pdf) and declare: no support from any organisation for the  
36  
37 37 submitted work; no financial relationships with any organisation that might have an interest in the  
38  
39 38 submitted work in the previous three years; no other relationships or activities that could appear  
40  
41 39 to have influenced the submitted work  
42  
43  
44

45 40 **TRANSPARENCY DECLARATION**  
46  
47  
48

49 41 The lead author (the manuscript's guarantor) affirms that the manuscript is an honest,  
50  
51 42 accurate, and transparent account of the study being reported; that no important aspects of the  
52  
53 43 study have been omitted; and that any discrepancies from the study as planned (and, if relevant,  
54  
55 44 registered) have been explained.  
56  
57  
58  
59  
60

1  
2  
3  
4  
5  
6  
7  
8  
9  
10  
11  
12  
13  
14  
15  
16  
17  
18  
19  
20  
21  
22  
23  
24  
25  
26  
27  
28  
29  
30  
31  
32  
33  
34  
35  
36  
37  
38  
39  
40  
41  
42  
43  
44  
45  
46  
47  
48  
49  
50  
51  
52  
53  
54  
55  
56  
57  
58  
59  
60

45 **FUNDING STATEMENT**

46 This study received no funding.

47

For peer review only

## 48 **ABSTRACT (300 WORDS)**

49 **Objective:** Although adaptive e-learning environments (AEEs) can provide personalized  
50 instruction to health professional and students, their efficacy remains unclear. Therefore, this  
51 review aimed to identify, appraise, and synthesize the evidence regarding the efficacy of AEEs in  
52 improving knowledge, skills, and clinical behavior in health professionals and students.

53 **Design:** Systematic review and meta-analysis.

54 **Data Sources:** CINAHL, EMBASE, ERIC, PsycINFO, PubMed and Web of Science from the  
55 first year of records to February 2019.

56 **Eligibility Criteria:** Controlled studies that evaluated the effect of an AEE on knowledge, skills  
57 or clinical behavior in health professionals or students.

58 **Screening, Data Extraction and Synthesis:** AEEs were reviewed with regard to their topic,  
59 theoretical framework, and adaptivity process. Studies were included in the meta-analysis if they  
60 had a non-AEE control group and had no missing data. Effect sizes (ES) were pooled using a  
61 random effects model. Two authors screened studies, extracted data, assessed risk of bias, and  
62 coded quality of evidence independently.

63 **Results:** From a pool of 10,569 articles, we included 21 eligible studies enrolling 3,684 health  
64 professionals and students. Clinical topics were mostly related to diagnostic testing, theoretical  
65 frameworks were heterogeneous, and the adaptivity process was characterized by 5 subdomains:  
66 method, goals, timing, factors, and types. The pooled ES was 0.70 for knowledge (95% CI, -0.08-  
67 1.49;  $P$  .08), and 1.19 for skills (95% CI, 0.59-1.79;  $P$  < .00001). Risk of bias was generally high.  
68 Heterogeneity was large in all analyses.

1  
2  
3 69 **Conclusions:** AEEs appear particularly effective in improving skills in health professionals and  
4  
5 70 students. The adaptivity process within AEEs may be more beneficial for learning skills rather  
6  
7 71 than factual knowledge, which generates less cognitive load. Future research should report more  
8  
9 72 clearly on the design and adaptivity process of AEEs, and target higher-level outcomes, such as  
10  
11 73 clinical behavior.  
12  
13  
14

15 74 **PROSPERO registration number:** CRD42017065585  
16  
17

18 75 **Keywords:** Computer-assisted instruction; medical education; nursing education; e-learning,  
19  
20 76 meta-analysis  
21  
22  
23  
24  
25  
26  
27  
28  
29  
30  
31  
32  
33  
34  
35  
36  
37  
38  
39  
40  
41  
42  
43  
44  
45  
46  
47  
48  
49  
50  
51  
52  
53  
54  
55  
56  
57  
58  
59  
60



## 77 **ARTICLE SUMMARY**

### 78 **Strengths and Limitations of the Study**

- 79 • This is the first systematic review and meta-analysis examining the efficacy of adaptive e-  
80 learning environments in improving knowledge, skills, and clinical behavior in health  
81 professionals and students.
- 82 • Strengths of this review include the broad search strategy, and in-depth assessments of the  
83 risk of bias and the quality of evidence.
- 84 • High statistical heterogeneity resulting from clinical and methodological diversity limits  
85 the interpretation of findings.
- 86 • Quantitative results should be treated with caution, given the small number and risk of  
87 bias of studies included in the meta-analysis.

## 88 INTRODUCTION

89 The use of information and communication technologies (ICTs) in the education of health  
90 professionals and students has become ubiquitous. Indeed, e-learning, defined as the use of ITCs  
91 to access educational curriculum and support learning<sup>1</sup>, is increasingly present in clinical settings  
92 for the continuing education of health professionals<sup>2,3</sup>, and in academic settings for the education  
93 of health professions students<sup>4</sup>. E-learning environments integrate information, in the form of text  
94 and multimedia (e.g., illustrations, animations, videos). They can include both asynchronous (i.e.,  
95 designed for self-study) and synchronous (i.e., a class taught by an educator in real time)  
96 components<sup>1</sup>. *Nonadaptive* e-learning environments, the most widespread type of e-learning  
97 environment today, provide a standardized training for all learners<sup>5,6</sup>. While they can include  
98 instructional design variations (e.g., interactivity, feedback, practice exercises), they *do not*  
99 consider learners' characteristics and the data generated during the learning process to provide a  
100 personalized training<sup>6-8</sup>. This is problematic, since the interaction of health professionals and  
101 students with e-learning environments during the learning process generates a significant amount  
102 of data<sup>9</sup>. However, designers of e-learning environments and educators rarely make use of this  
103 data to optimize learning efficacy and efficiency<sup>9</sup>.

104 In recent years, educational researchers have strived to develop e-learning environments that take  
105 a data-driven and personalized approach to education<sup>10-13</sup>. E-learning environments that take into  
106 account each learner's interactions and performance level could anticipate what types of content  
107 and resources meet the learner's needs, potentially increasing learning efficacy and efficiency<sup>13</sup>.

108 Adaptive e-learning environments (AEEs) were developed for this purpose. AEEs collect data to  
109 build each learner's profile (e.g., navigation behavior, preferences, knowledge), and use simple  
110 techniques (e.g., adaptive information filtering, adaptive hypermedia) to implement different

1  
2  
3 111 types of adaptivity targeting the content, navigation, presentation, multimedia, or strategies of the  
4  
5 112 training to provide a personalized learning experience<sup>11 12</sup>. In the fields of computer science and  
6  
7 113 educational technology, the term *adaptivity* refers to the process executed by a system based on  
8  
9 114 ICTs of adapting educational curriculum content, structure or delivery to the profile of a  
10  
11 115 learner<sup>14</sup>. Two main methods of adaptivity can be implemented within an AEE. The first method,  
12  
13 116 *designed adaptivity*, is expert-based and refers to an educator who designs the optimal  
14  
15 117 instructional sequence to guide learners to learning content mastery. The educator determines  
16  
17 118 how the curriculum will adapt to learners based on a variety of factors, such as knowledge or  
18  
19 119 response time to a question. This method of adaptivity is thus based on the expertise of the  
20  
21 120 educator who specifies how technology will react in a particular situation on the basis of the “if  
22  
23 121 THIS, then THAT” approach. The second method, *algorithmic adaptivity*, refers to use of  
24  
25 122 algorithms to determine, for instance, the extent of the learner’s knowledge and the optimal  
26  
27 123 instructional sequence. Algorithmic adaptivity requires more advanced adaptivity techniques and  
28  
29 124 learner-modelling techniques derived from the fields of computer science and artificial  
30  
31 125 intelligence (e.g. Bayesian knowledge tracing, rule-based machine learning, natural language  
32  
33 126 processing)<sup>10 15-18</sup>.

34  
35  
36  
37  
38  
39  
40  
41 127 The variability in the degree and the complexity of adaptivity within AEEs mirrors the adaptivity  
42  
43 128 that can be observed in non-e-learning educational interventions. Some interventions, like one-  
44  
45 129 on-one human instruction and small-group classroom instruction, generally have a high degree of  
46  
47 130 adaptivity since the instructor can adapt his teaching to the individual profiles of learners and  
48  
49 131 consider their feedback<sup>19</sup>. Other interventions, like large-group classroom instruction, generally  
50  
51 132 have a low degree of adaptivity to individual learners. In some interventions, like paper-based  
52  
53 133 instruction (e.g., handouts, textbooks), there is no adaptivity at all.  
54  
55  
56  
57  
58  
59  
60

1  
2  
3 134 AEEs have been developed and evaluated primarily in academic settings for students in  
4  
5 135 mathematics, physics and related disciplines, for the acquisition of knowledge and development  
6  
7 136 of cognitive skills (e.g., arithmetic calculation). Four meta-analyses reported on the efficacy of  
8  
9 137 AEEs among high school and university students in in these fields of study<sup>15-17 20</sup>. The results are  
10  
11 138 promising: AEEs are in almost all cases more effective than large-group classroom instruction. In  
12  
13 139 addition, Nesbit, et al.<sup>21</sup> point out that AEEs are more effective than nonadaptive e-learning  
14  
15 140 environments. However, despite evidence of the efficacy of AEEs for knowledge acquisition and  
16  
17 141 skill development in areas such as mathematics in high school and university students, their  
18  
19 142 efficacy in improving learning outcomes in health professionals and students has not yet been  
20  
21 143 established. To address this need, we conducted a systematic review and meta-analysis to identify  
22  
23 144 and quantitatively synthesize all comparative studies of AEEs involving health professionals and  
24  
25 145 students.

### 146 **Systematic Review and Meta-Analysis Objective**

147 To systematically identify, appraise, and synthesize the best available evidence regarding the  
148 efficacy of AEEs in improving knowledge, skills, and clinical behavior in health professionals  
149 and students.

### 150 **Systematic Review and Meta-Analysis Questions**

151 We sought to answer the following questions with the systematic review:

- 152 1. What are the characteristics of studies assessing an AEE designed for health  
153 professionals' and students' education?
- 154 2. What are the characteristics of AEEs designed for health professionals' or students'  
155 education?

1  
2  
3 156 We sought to answer the following question with the meta-analysis:  
4  
5

6 157 3. What is the efficacy of AEEs in improving knowledge, skills, and clinical behavior in  
7  
8 158 health professionals and students in comparison with nonadaptive e-learning  
9  
10 159 environments, and non-e-learning educational interventions?  
11  
12  
13

## 14 160 **METHODS**

15  
16

17 161 We planned and conducted this systematic review following the Effective Practice and  
18  
19 162 Organization of Care (EPOC) Cochrane Group guidelines<sup>22</sup>, and reported it according to the  
20  
21 163 Preferred Reporting Items for Systematic review and Meta-Analysis (PRISMA) standards<sup>23</sup> (see  
22  
23 164 **Supplementary File 1**). We prospectively registered (International Prospective Register of  
24  
25 165 Systematic Reviews #CRD42017065585) and published the protocol of this systematic review<sup>24</sup>.  
26  
27 166 Thus, in this paper, we present an abridged version of the methods with an emphasis on changes  
28  
29 167 made to the methods since the publication of the protocol.  
30  
31  
32  
33

### 34 168 **Study Eligibility**

35  
36

37 169 We included primary research articles that assessed an AEE with licensed health professionals,  
38  
39 170 students, trainees, and residents in any discipline. We defined an AEE as a computer-based  
40  
41 171 learning environment which collects data to build each learner's profile (e.g., navigation  
42  
43 172 behavior, individual objectives, knowledge), interprets these data through algorithms, and adapts  
44  
45 173 in real-time the content (e.g., showing/hiding information), navigation (e.g., specific links and  
46  
47 174 paths), presentation (e.g., page layout), multimedia presentation (e.g., images, videos), or tools  
48  
49 175 (e.g., different set of strategies for different types of learners) to provide a dynamic and  
50  
51 176 evolutionary learning path for each learner<sup>10 14</sup>. We used the definitions of each type of adaptivity  
52  
53  
54 177 proposed by Knutov and colleagues<sup>12</sup>. We considered for inclusion studies in which AEEs had  
55  
56  
57  
58  
59  
60

1  
2  
3 178 designed or algorithmic adaptivity, and studies including a co-intervention in addition to adaptive  
4  
5 179 e-learning (e.g. paper-based instruction). We considered for inclusion primary research articles  
6  
7 180 in which the comparator was: 1) a nonadaptive e-learning environment; 2) a non-e-learning  
8  
9 181 educational intervention; 3) another AEE with design variations. While included in the qualitative  
10  
11 182 synthesis of the evidence for descriptive purposes, the third comparator was excluded from the  
12  
13 183 meta-analysis. Outcomes of interest were knowledge, skills, and behavior<sup>25 26</sup>, and were defined  
14  
15 184 as follows: 1) knowledge: subjective (e.g., learner self-report) or objective (e.g., multiple-choice  
16  
17 185 question knowledge test) assessments of factual or conceptual understanding; 2) skills: subjective  
18  
19 186 (eg, learner self-report) or objective (eg, faculty ratings) assessments of procedural skills (e.g.  
20  
21 187 taking a blood sample, performing CPR) or cognitive skills (e.g. problem-solving, interpreting  
22  
23 188 radiographs) in learners; 3) behavior: subjective (eg, learner self-report) or objective (eg, chart  
24  
25 189 audit) assessments of behaviors in clinical practice (such as test ordering)<sup>6</sup>. In terms of study  
26  
27 190 design, we considered for inclusion all controlled, quantitative studies in accordance with the  
28  
29 191 EPOC Cochrane Review Group guidelines<sup>27</sup>.

30  
31  
32  
33  
34  
35  
36 192 We excluded studies that: 1) were not published in English or French; 2) were non-experimental;  
37  
38 193 3) were not controlled; 4) did not report on at least one of the outcomes of interest in this review;  
39  
40 194 5) did not have a topic related to the clinical aspects of health.

## 41 42 43 195 **Study Identification**

44  
45  
46  
47 196 We previously published our search strategy<sup>24</sup>. Briefly, we designed a strategy in consultation  
48  
49 197 with a librarian to search CINAHL, EMBASE, ERIC, PsycINFO, PubMed and Web of Science  
50  
51 198 for primary research articles published since the inception of each database up to February 2019.  
52  
53 199 The search strategy revolved around 3 key concepts: “adaptive e-learning environments”, “health

1  
2  
3 200 professionals/students”, and “effects on knowledge/competence (skills)/behavior” (see  
4  
5 201 **Supplementary file 2**). To identify additional articles, we hand-searched 6 key journals (e.g.,  
6  
7 202 *British Journal of Educational Technology, Computers and Education*) and the reference lists of  
8  
9  
10 203 included primary research articles.

## 13 204 **Study Selection**

16 205 We worked independently and in duplicate (G.F. and M.-A.M.-C./T.M.) to screen all titles and  
17  
18 206 abstracts for inclusion using the EndNote software V8.0 (Clarivate Analytics). We resolved  
19  
20  
21 207 disagreements by consensus. We then performed the full-text assessment of potentially eligible  
22  
23 208 articles using the same methodology. Studies were included in the meta-analysis if they had a  
24  
25 209 non-AEE control group and had no missing data.

## 28 210 **Data Extraction**

31  
32 211 One review author (G.F.) extracted data from included primary research articles using a modified  
33  
34 212 version of the data collection form developed by the EPOC Cochrane Review Group<sup>28</sup>. The main  
35  
36 213 changes made to the extraction form were the addition of specific items relating to the AEE  
37  
38 214 assessed in each study. Two review authors (T.M., M.-F.D.) validated the data extraction forms  
39  
40 215 by reviewed the contents of each form against the data in the original article, adding comments  
41  
42  
43 216 when changes were needed. For all studies, we extracted the following data items if possible:

- 46 217 • *the population and setting*: study setting, study population, inclusion criteria, exclusion  
47  
48 218 criteria;
- 51 219 • *the methods*: study aim, study design, unit of allocation, study start date and end date, and  
52  
53 220 duration of participation;

- 1  
2  
3 221 • *the participants*: study sample, withdrawals and exclusions, age, sex, level of instruction,  
4  
5 222 number of years of experience as a health professional, practice setting, and previous  
6  
7 223 experience using e-learning;  
8  
9  
10 224 • *the interventions*: name of intervention, theoretical framework, statistical model/algorithm  
11  
12 225 used to generate the learning path, clinical topic, number of training sessions, duration of  
13  
14 226 each training session, total duration of the training, adaptivity subdomains (method, goals,  
15  
16 227 timing, factors, types), mode of delivery, presence of other educational interventions and  
17  
18 228 strategies;  
19  
20 229 • *the outcomes*: name, time-points measured, definition, person measuring, unit of  
21  
22 230 measurement, scales, validation of measurement tool;  
23  
24 231 • *the results*: results according to our primary (knowledge) and secondary (skills, behavior)  
25  
26 232 outcomes, comparison, time-point, baseline data, statistical methods used, and key  
27  
28 233 conclusions.

29 234 We contacted the corresponding authors of included primary research articles to provide us with  
30  
31 235 missing data.

### 32 236 **Assessment of the Risk of Bias**

33  
34 237 We worked independently and in duplicate (G.F. and T.M./M.-F.D.) to assess the risk of bias of  
35  
36 238 included primary research articles using the EPOC risk of bias criteria, based upon the data  
37  
38 239 extracted with the data collection form<sup>28</sup>. A study was deemed at high risk of bias if the  
39  
40 240 individual criterion “random sequence generation” was scored at “high” or at “unclear” risk of  
41  
42 241 bias.



## 242 Data Synthesis

243 First, we synthesized data qualitatively using tables to provide an overview of the included  
244 studies, and of the AEEs reported in these studies.

245 Second, using the Review Manager (RevMan) software V5.1, we first conducted a meta-analysis  
246 to quantitatively synthesize the efficacy of AEEs versus other educational interventions in  
247 improving all learning outcomes. We included studies in the meta-analysis if the comparator  
248 wasn't another AEE, if they were randomized, and if they reported outcome data. We then  
249 conducted meta-analyses with the same comparison for each outcome for which data from at  
250 least 2 studies were available (i.e., knowledge, skills). For randomized controlled trials (RCTs),  
251 we converted each post-test mean and standard deviation (SD) to a standardized mean difference  
252 ([SMD], also known as Hedges g effect size [ES]). For crossover RCTs, we used means pooled  
253 across each intervention. We pooled ESs using a random effects model. Statistical significance  
254 was defined by a two-sided alpha of .05.

255 We first assessed heterogeneity qualitatively by examining the characteristics of included studies,  
256 the similarities and disparities between the types of participants, the types of interventions, and  
257 the types of outcomes. We then used the  $I^2$  statistic within the RevMan software to quantify how  
258 much the results varied across individual studies (i.e., between-study inconsistency, or  
259 heterogeneity). We interpreted the  $I^2$  values as follows: 0%-40%: might not be important; 30%-  
260 60%: may represent moderate heterogeneity; 50%-90%: may represent substantial heterogeneity;  
261 and 75%-100%: considerable heterogeneity<sup>29</sup>. We performed sensitivity analysis to assess if the  
262 exclusion of studies at high risk of bias or with a small sample size ( $n < 20$ ) would have had an

1  
2  
3 263 impact on statistical heterogeneity. The small number of studies included in each meta-analysis  
4  
5 264 did not allow for subgroup analyses to be performed.  
6  
7

8 265 Since less than 10 studies were included in the meta-analysis for each outcome, we did not assess  
9  
10 266 reporting biases using a funnel plot, as suggested in the Cochrane Handbook<sup>30</sup>.  
11  
12  
13

## 14 267 **Assessment of the Quality of Evidence**

15  
16

17 268 We worked independently and in duplicate (G.F. and M.-A.M.-C.) to assess the quality of  
18  
19 269 evidence for each individual outcome. We used the Grading of Recommendations Assessment,  
20  
21 270 Development, and Evaluation (GRADE) Web-based software, based upon the data extracted with  
22  
23 271 the data collection checklist<sup>31</sup>. We considered 5 factors (risk of bias of included studies,  
24  
25 272 indirectness of evidence, unexplained heterogeneity or inconsistency of results, imprecision of  
26  
27 273 the results, probability of reporting bias) for downgrading the quality of the body of evidence for  
28  
29 274 each outcome<sup>31</sup>.  
30  
31  
32  
33

## 34 275 **Patient and Public Involvement**

35  
36

37 276 Patients and the public were not involved in setting the research question, the outcome measures,  
38  
39 277 the design or conduct of this systematic review. Patients and the public were not asked to advise  
40  
41 278 on interpretation of results or to contribute to the writing or editing of this document.  
42  
43  
44

## 45 279 **RESULTS**

46  
47

### 48 280 **Study Flow**

49  
50

51 281 From a pool of 10,569 potentially relevant articles, we found 21 quantitative, controlled studies  
52  
53 282 assessing an AEE with health professionals or students (see **Figure 1**).  
54  
55  
56  
57  
58  
59  
60

1  
2  
3 283 [Insert Figure 1]  
4  
5

6 284 Out of 21 included studies in the qualitative synthesis, 4 studies compared two AEEs with design  
7  
8 285 variations<sup>32-35</sup>, and 4 studies had missing data<sup>36-39</sup>. Thus, these 8 studies could not be included in  
9  
10 286 the meta-analysis and the remaining 13 studies were used to calculate an ES on learning  
11  
12  
13 287 outcomes.  
14  
15

## 16 288 **Study Characteristics**

17  
18  
19 289 We summarized the key characteristics of included studies in table format (see **Table 1**). In terms  
20  
21 290 of study population, in the 21 studies examined published between 2003 and 2018, investigators  
22  
23 291 have evaluated AEEs mostly in the medical field. Studies focused on medical students (n=8)<sup>38-44</sup>,  
24  
25 292 medical residents (n=8)<sup>32-35 41 45-47</sup>, physicians in practice (n=4)<sup>36 37 41 48</sup>, nursing students (n=2)  
26  
27 293 <sup>40 49</sup>, nurses in practice (n=2)<sup>48 50</sup> and health sciences students (n=1)<sup>51</sup>. Three studies focused on  
28  
29 294 multiple populations<sup>40 41 48</sup>. The median sample size was 46 participants (interquartile range  
30  
31 295 [IQR] 123). In terms of study design, 15 out of 21 studies (71%) were randomized, 7 studies of  
32  
33 296 which were randomized crossover trials<sup>33 34 41-43 45 47</sup>. The median number of training sessions  
34  
35 297 was 2 (IQR 2.5 sessions), the median training time was 2.13 hours (IQR 2.88 hours), and the  
36  
37 298 median training period was 14 days (IQR 45 days). In terms of comparators, it is possible to  
38  
39 299 underline three types of comparisons. The first comparison is an AEE versus another AEE with  
40  
41 300 design variations (n=4)<sup>32-35</sup>, which implies that one of the AEEs assessed had variations in its  
42  
43 301 design, such as different types of adaptivity (e.g., feedback in one AEE is longer or more  
44  
45 302 complex than in the other). The second comparison is an AEE versus a nonadaptive e-learning  
46  
47 303 environment (n=11)<sup>38-40 42-46 48 50 51</sup>. The third and final comparison is an AEE versus another  
48  
49 304 type of educational intervention, such as a paper-based educational intervention, including  
50  
51  
52  
53  
54  
55  
56  
57  
58  
59  
60

1  
2  
3 305 handouts, textbooks or images (n=3)<sup>37 41 47</sup>, or a traditional educational intervention, such as a  
4  
5 306 group lecture (n=2)<sup>49 52</sup>. In one study, the comparator was not clearly reported<sup>36</sup>. As stated  
6  
7 307 before, only the second and third types of comparisons were included in the meta-analysis since  
8  
9  
10 308 our aim was to synthesize quantitatively the efficacy of AEEs versus other types of educational  
11  
12 309 interventions. Finally, in terms of outcomes, investigators evaluated learners' knowledge (n=15)  
13  
14 310<sup>32 33 35 36 38 39 41-45 47-50</sup>, satisfaction (n=9)<sup>32 34 38 39 41-43 45 47</sup>, skills (n=8)<sup>34 36 37 40 46 50-52</sup>,  
15  
16  
17 311 metacognitive processes (n=3)<sup>32 33 35</sup>, attitudes (n=2)<sup>36 50</sup>, and behavior (n=1)<sup>50</sup>.  
18  
19  
20  
21  
22  
23  
24  
25  
26  
27  
28  
29  
30  
31  
32  
33  
34  
35  
36  
37  
38  
39  
40  
41  
42  
43  
44  
45  
46  
47  
48  
49  
50  
51  
52  
53  
54  
55  
56  
57  
58  
59  
60

312 **Table 1. Characteristics of included studies.**

| First author, year<br>Country                                                    | Participants*        | Study design†                                      | No. and duration of training<br>sessions | Duration of<br>intervention | Comparison(s)‡   | Outcome(s)§                            |
|----------------------------------------------------------------------------------|----------------------|----------------------------------------------------|------------------------------------------|-----------------------------|------------------|----------------------------------------|
| Comparison: adaptive e-learning environments vs. other educational interventions |                      |                                                    |                                          |                             |                  |                                        |
| Casebeer, 2003<br>USA                                                            | PP; N = 181          | RCT; posttest-only, 2 groups                       | 4 sessions; 1 hour each                  | NR                          | NR               | Knowledge Δ<br>Attitudes Δ<br>Skills Δ |
| Cook, 2008<br>USA                                                                | R; N = 122           | RXT; posttest-only, 4 groups                       | 4 sessions; 30 minutes each              | 126 days                    | NEE              | Satisfaction<br>Knowledge              |
| Crowley, 2010<br>USA                                                             | PP; N = 15           | RCT; pretest–posttest, 2 groups                    | 4 sessions; 4 hours each                 | 138 days                    | P                | Skills Δ                               |
| de Ruijter, 2018<br>Netherlands                                                  | NP; N = 269          | RCT; pretest-posttest, 2 groups                    | No fixed sessions                        | 180 days                    | NEE              | Knowledge<br>Attitudes<br>Behavior Δ   |
| Hayes-Roth, 2010<br>USA                                                          | MS, NS; N = 30       | RCT; pretest–posttest–retention-test, 3<br>groups  | NR; mean training time 2.36 hours        | NR                          | 1. NEE<br>2. NI  | Skills Δ                               |
| Lee, 2017<br>USA                                                                 | MS; N = 1522         | NRCT; pretest-posttest, 3 groups                   | 5 sessions; NR                           | 42 days                     | NEE              | Knowledge<br>Skills Δ<br>Behavior Δ    |
| Micheel, 2017<br>USA                                                             | PP, NP; N = 751      | NRCT; pretest–posttest–retention-test, 2<br>groups | NR                                       | NR                          | NEE              | Knowledge Δ                            |
| Morente, 2013<br>Spain                                                           | NS; N = 73           | RCT; pretest–posttest, 2 groups                    | 1 session; 4 hours                       | 1 day                       | T                | Knowledge Δ                            |
| Munoz, 2010<br>Colombia                                                          | MS; N = 40           | NRCT; pretest–posttest, 2 groups                   | NR; mean training time 5.97 hours        | NR                          | NEE              | Satisfaction<br>Knowledge              |
| Romito, 2016<br>USA                                                              | R; N = 24            | NRCT; pretest–posttest–retention-test, 2<br>groups | 1 session; 30 minutes                    | 1 day                       | NEE & T          | Skills Δ                               |
| Samulski, 2017<br>USA                                                            | MS, R, PP; N =<br>36 | RXT; pretest–posttest, 2 groups                    | 2 sessions; 20 minutes to 14<br>hours    | 1 month                     | P                | Satisfaction<br>Knowledge              |
| Thai, 2015<br>USA                                                                | HSC; N = 87          | RCT; pretest–posttest–retention-test, 3<br>groups  | 1 session; 45 minutes                    | 1 day                       | 1. AEE<br>2. NEE | Skills Δ                               |
| Van Es, 2015<br>Australia                                                        | R; N = 43            | RXT; posttest-only, 2 groups                       | 3 sessions; NR                           | 50 days                     | P                | Satisfaction<br>Knowledge Δ            |
| Van Es, 2016                                                                     | MS; N = 46           | RXT; posttest-only, 2 groups                       | 3 sessions; 2 hours each                 | 34 days                     | NEE              | Satisfaction                           |

1  
2  
3  
4  
5  
6  
7  
8  
9  
10  
11  
12  
13  
14  
15  
16  
17  
18  
19  
20  
21  
22  
23  
24  
25  
26  
27  
28  
29  
30  
31  
32  
33  
34  
35  
36  
37  
38  
39  
40  
41  
42  
43  
44  
45  
46  
47

|                                                                                                  |             |                                                 |                             |         |                    |                                                         |           |
|--------------------------------------------------------------------------------------------------|-------------|-------------------------------------------------|-----------------------------|---------|--------------------|---------------------------------------------------------|-----------|
| Australia                                                                                        |             |                                                 |                             |         |                    |                                                         | Knowledge |
| Wong, 2015<br>Australia                                                                          | MS; N = 99  | RXT; posttest-only, 2 groups                    | 2 sessions; 1.5 hour each   | 14 days | NEE                | Satisfaction<br>Knowledge Δ                             |           |
| Wong, 2017<br>USA                                                                                | MS; N = 178 | NRCT; pretest–posttest–retention-test, 3 groups | 1 session; NR               | 35 days | 1. T<br>2. AEE & T | Skills Δ                                                |           |
| Woo, 2006<br>USA                                                                                 | MS; N = 73  | NRCT; pretest–posttest, 3 groups                | 1 session; 2 hours          | 1 day   | 1. NEE<br>2. NI    | Satisfaction<br>Knowledge                               |           |
| <b>Comparison: adaptive e-learning vs. adaptive e-learning (two AEEs with design variations)</b> |             |                                                 |                             |         |                    |                                                         |           |
| Crowley, 2007<br>USA                                                                             | R; N = 21   | RCT; pretest–posttest–retention-test, 2 groups  | 1 session; 4.5 hours        | 1 day   | AEE                | Satisfaction<br>Metacognitive<br>processes<br>Knowledge |           |
| El Saadawi, 2008<br>USA                                                                          | R; N = 20   | RXT; pretest–posttest, 2 groups                 | 2 sessions; 2 hours each    | 1 day   | AEE                | Satisfaction<br>Skills                                  |           |
| El Saadawi, 2010<br>USA                                                                          | R; N = 23   | RXT; pretest–posttest, 2 groups                 | 2 sessions; 2.25 hours each | 2 days  | AEE                | Metacognitive<br>processes<br>Knowledge                 |           |
| Feyzi-Begnagh,<br>2014<br>USA                                                                    | R; N = 31   | RCT; pretest–posttest, 2 groups                 | 2 sessions; 2 & 3 hours     | 1 day   | AEE                | Metacognitive<br>processes<br>Knowledge                 |           |

\* Participants: MS indicates medical students; NS, nursing students; R, residents (physicians in postgraduate training); PP, physicians in practice; NP, nurses in practice; HSC, health sciences students.  
 † Study design: RCT indicates randomized controlled trial; RXT, randomized crossover trial; NRCT, non-randomized controlled trial.  
 ‡ Comparison: AEE indicates adaptive e-learning environment; NEE, nonadaptive e-learning environment; NI, no-intervention control group; T, traditional (group lecture); P, paper (handout, textbook, or latent image cases).  
 § Outcomes: Δ indicates a statistically significant improvement regarding this outcome in the experimental group in comparison with the control group for studies comparing an AEE with other educational interventions.

## 322 **Characteristics of Adaptive E-Learning Environments**

323 We summarized the key characteristics of AEEs assessed in the 21 studies in table format (see  
324 **Table 2**). In terms of the clinical topics of the AEEs, the majority of AEEs focused on training  
325 medical students and residents in executing and/or interpreting diagnostic tests. Indeed, a  
326 significant proportion of the AEEs assessed focused on dermatopathology and cytopathology  
327 microscopy<sup>32-35 37 41 42 47</sup> (n=8). Other topics were diagnostic imaging<sup>43 46</sup> (n=2), behavior change  
328 counseling<sup>40 50</sup> (n=2), chronic disease management<sup>45 48</sup> (n=2), pressure ulcer evaluation<sup>49</sup> (n=1),  
329 childhood illness management<sup>38</sup> (n=1), electrocardiography<sup>51</sup> (n=1), fetal heart rate  
330 interpretation<sup>52</sup> (n=1), hemodynamics<sup>39</sup> (n=1), chlamydia screening (n=1)<sup>36</sup> and atrial  
331 fibrillation management (n=1)<sup>44</sup>.

332 The 21 AEEs examined were based on a wide variety of theoretical frameworks. The most  
333 frequently used framework was cognitive tutoring, adopted in 5 studies<sup>32-35 37</sup>, which refers to the  
334 use of a cognitive model. The integration of a cognitive model in an AEE implies the  
335 representation of all the knowledge in the field of interest in a way that is similar to the human  
336 mind for the purpose of understanding and predicting the cognitive processes of learners<sup>53</sup>. The  
337 second most used framework was perceptual learning, adopted in 3 studies<sup>46 51 52</sup>. Perceptual  
338 learning aims at improving information extraction skills of the environment and the development  
339 of automaticity in this respect in learners<sup>46</sup>. Interestingly, 2 studies used models from behavioral  
340 science, the Transtheoretical Model<sup>36</sup> and the I-Change Model<sup>50</sup>, to tailor the AEE to the  
341 theoretical determinants of clinical behavior change in nurses and physicians in practice.  
342 Theoretical frameworks relating to self-regulated learning<sup>35</sup>, learning styles<sup>38 48</sup>, guided mastery  
343<sup>40</sup>, and cognitive load<sup>43</sup>, problem-based-learning<sup>36</sup>, and situated learning<sup>36</sup> were also used.

1  
2  
3 344 Three main adaptive e-learning platforms were used by investigators in studies examined:  
4  
5 345 SlideTutor (n=4)<sup>33 37 54 55</sup>, Smart Sparrow (n=4)<sup>41-43 47</sup>, and the Perceptual Adaptive Learning  
6  
7 346 Module (PALM, n=3)<sup>51 52 56</sup>. SlideTutor is an AEE with algorithmic adaptivity which provides  
8  
9  
10 347 cases to be solved by learners under supervision by the system. These cases incorporate  
11  
12 348 dermatology virtual slides that must be examined by learners to formulate a diagnosis. An  
13  
14 349 expert knowledge base, consisting of evidence-diagnosis relationships, is used by SlideTutor to  
15  
16 350 create a dynamic solution graph representing the current state of the learning process and to  
17  
18 351 determine the optimal instructional sequence<sup>55</sup>. Smart Sparrow is an AEE with designed  
19  
20 352 adaptivity which allows educators to determine adaptive factors, such as answers to questions,  
21  
22 353 response time to a question, and learner actions, to specify how the system will adapt the  
23  
24 354 instructional sequence or provide feedback. These custom learning paths can be more or less  
25  
26 355 personalized<sup>42</sup>. PALM is an AEE with algorithmic adaptivity aiming to improve perceptual  
27  
28 356 learning through adaptive response-time-based sequencing to determine dynamically the spacing  
29  
30  
31 357 between different learning items based on each learner's accuracy and speed in interactive  
32  
33 358 learning trials<sup>51</sup>. Different custom adaptive e-learning platforms were used in other studies.  
34  
35  
36  
37  
38  
39  
40  
41  
42  
43  
44  
45  
46  
47  
48  
49  
50  
51  
52  
53  
54  
55  
56  
57  
58  
59  
60



361 Table 2. Characteristics of adaptive e-learning environments.

| First Author, Year      | Clinical Topic(s)                                 | Theoretical Framework(s)                                                           | Platform                             | Adaptivity Subdomains  |                                                                              |                                                                         |                                                                                    |                                                                                                                                                  |
|-------------------------|---------------------------------------------------|------------------------------------------------------------------------------------|--------------------------------------|------------------------|------------------------------------------------------------------------------|-------------------------------------------------------------------------|------------------------------------------------------------------------------------|--------------------------------------------------------------------------------------------------------------------------------------------------|
|                         |                                                   |                                                                                    |                                      | Adaptivity Method      | Adaptivity Goals                                                             | Adaptivity Timing                                                       | Adaptivity Factors                                                                 | Adaptivity Types                                                                                                                                 |
| <b>Casebeer, 2003</b>   | Chlamydia screening                               | Transtheoretical model of change; Problem-based learning; Situated learning theory | NR                                   | Designed Adaptivity    | To increase learning effectiveness (knowledge, skills).                      | Throughout the training, after case-based and practice-based questions. | User answers to questions                                                          | <ul style="list-style-type: none"> <li>• Content</li> <li>• Navigation</li> </ul>                                                                |
| <b>Cook, 2008</b>       | Diabetes, hyperlipidemia, asthma, depression      | NR                                                                                 | NR                                   | Designed Adaptivity    | To increase learning efficiency (knowledge gain divided by learning time).   | After each case-based question in each module (17 to 21 times/module).  | User knowledge                                                                     | <ul style="list-style-type: none"> <li>• Content</li> <li>• Navigation</li> </ul>                                                                |
| <b>Crowley, 2007</b>    | Dermopathology; subepidermal vesicular dermatitis | Cognitive Tutoring                                                                 | SlideTutor                           | Algorithmic Adaptivity | To increase learning gains, metacognitive gains, and diagnostic performance. | At the beginning of each case.                                          | User actions: results of problem-solving tasks; requests for help                  | <ul style="list-style-type: none"> <li>• Content</li> <li>• Navigation</li> <li>• Presentation</li> <li>• Multimedia</li> <li>• Tools</li> </ul> |
| <b>Crowley, 2010</b>    | Dermopathology; melanoma                          | Cognitive Tutoring                                                                 | SlideTutor                           | Algorithmic Adaptivity | To improve reporting performance and diagnostic accuracy.                    | At the beginning of each case.                                          | User actions: results of problem-solving tasks; reporting tasks; requests for help | <ul style="list-style-type: none"> <li>• Content</li> <li>• Navigation</li> <li>• Presentation</li> <li>• Multimedia</li> <li>• Tools</li> </ul> |
| <b>de Ruijter, 2018</b> | Smoking cessation counseling                      | I-Change Model                                                                     | Computer-Tailored E-Learning Program | Designed Adaptivity    | To modify behavioral predictors and behavior.                                | At the beginning of the training.                                       | Demographics, behavioral predictors, behavior                                      | <ul style="list-style-type: none"> <li>• Content</li> </ul>                                                                                      |
| <b>El Saadawi, 2008</b> | Dermopathology; melanoma                          | Cognitive Tutoring                                                                 | ReportTutor                          | Algorithmic Adaptivity | To teach how to correctly identify and document all relevant                 | At the beginning of each case.                                          | User actions, report features                                                      | <ul style="list-style-type: none"> <li>• Content</li> <li>• Navigation</li> <li>• Presentation</li> <li>• Multimedia</li> </ul>                  |

|                            |                                                |                                                         |                                              |                        |                                                                                                                            |                                                      |                                                                                    |                                                                                                                                                  |
|----------------------------|------------------------------------------------|---------------------------------------------------------|----------------------------------------------|------------------------|----------------------------------------------------------------------------------------------------------------------------|------------------------------------------------------|------------------------------------------------------------------------------------|--------------------------------------------------------------------------------------------------------------------------------------------------|
|                            |                                                |                                                         |                                              |                        | prognostic factors in the diagnostic report.                                                                               |                                                      |                                                                                    |                                                                                                                                                  |
| <b>El Saadawi, 2010</b>    | Dermopathology                                 | Cognitive Tutoring                                      | SlideTutor                                   | Algorithmic Adaptivity | To facilitate transfer of performance gains to real-world tasks that do not provide direct feedback on intermediate steps. | During intermediate problem-solving steps.           | User actions: results of problem-solving tasks; reporting tasks; requests for help | <ul style="list-style-type: none"> <li>• Content</li> <li>• Navigation</li> <li>• Presentation</li> <li>• Multimedia</li> </ul>                  |
| <b>Feyzi-Begnagh, 2014</b> | Dermopathology; nodular and diffuse dermatitis | Cognitive Tutoring, Theories of Self-Regulated Learning | SlideTutor                                   | Algorithmic Adaptivity | To improve metacognitive and learning gains during problem solving.                                                        | During each case or immediately after each case.     | User actions: results of problem-solving tasks; reporting tasks; requests for help | <ul style="list-style-type: none"> <li>• Content</li> <li>• Navigation</li> <li>• Presentation</li> <li>• Multimedia</li> <li>• Tools</li> </ul> |
| <b>Hayes-Roth, 2010</b>    | Brief intervention training in alcohol abuse   | Guided Mastery                                          | STAR Workshop                                | NR                     | To improve attitudes and skills.                                                                                           | During clinical cases.                               | User scores, user-generated dialogue                                               | <ul style="list-style-type: none"> <li>• Content</li> <li>• Navigation</li> </ul>                                                                |
| <b>Lee, 2017</b>           | Treatment of atrial fibrillation               | NR                                                      | Learning Assessment Platform                 | Designed Adaptivity    | To increase learning effectiveness (knowledge, competence, confidence and practice).                                       | After learning gaps identified in the first session. | Learning gaps in relation to objectives                                            | <ul style="list-style-type: none"> <li>• Content</li> </ul>                                                                                      |
| <b>Micheel, 2017</b>       | Oncology                                       | Learning Style Frameworks                               | Learning-style tailored educational platform | Designed Adaptivity    | To increase learning effectiveness (knowledge).                                                                            | After assessing the learning style.                  | Learning style                                                                     | <ul style="list-style-type: none"> <li>• Presentation</li> <li>• Multimedia</li> <li>• Tools</li> </ul>                                          |

|                       |                                                                                 |                                                                    |               |                        |                                                                             |                                            |                                            |                                                                                                                                                  |
|-----------------------|---------------------------------------------------------------------------------|--------------------------------------------------------------------|---------------|------------------------|-----------------------------------------------------------------------------|--------------------------------------------|--------------------------------------------|--------------------------------------------------------------------------------------------------------------------------------------------------|
| <b>Morente, 2013</b>  | Pressure ulcer evaluation                                                       | NR                                                                 | ePULab        | Designed Adaptivity    | To increase learning effectiveness (knowledge, skills).                     | Each pressure ulcer evaluation.            | User skills                                | <ul style="list-style-type: none"> <li>• Content</li> </ul>                                                                                      |
| <b>Munoz, 2010</b>    | Management of childhood illness                                                 | Learning Styles Framework                                          | SIAS-ITS      | Designed Adaptivity    | To increase learning effectiveness and efficiency.                          | At the beginning of the training.          | User knowledge, user learning style        | <ul style="list-style-type: none"> <li>• Content</li> <li>• Tools</li> </ul>                                                                     |
| <b>Romito, 2016</b>   | Transoesophageal echocardiography                                               | Perceptual Learning                                                | TOE PALM      | Algorithmic Adaptivity | To improve response accuracy and response time.                             | After each clinical case.                  | User response accuracy, user response time | <ul style="list-style-type: none"> <li>• Content</li> <li>• Navigation</li> <li>• Multimedia</li> </ul>                                          |
| <b>Samulski, 2017</b> | Cytopathology; pap test, squamous lesions, glandular lesions                    | NR                                                                 | Smart Sparrow | Designed Adaptivity    | To improve learning effectiveness.                                          | During intermediate problem-solving steps. | User knowledge                             | <ul style="list-style-type: none"> <li>• Content</li> <li>• Navigation</li> </ul>                                                                |
| <b>Thai, 2015</b>     | Electrocardiography                                                             | Perceptual Learning Theory; Adaptive response-time based algorithm | PALM          | Algorithmic Adaptivity | To improve perceptual classification learning effectiveness and efficiency. | After each user response.                  | User response accuracy, user response time | <ul style="list-style-type: none"> <li>• Content</li> <li>• Presentation</li> <li>• Multimedia</li> <li>• Tools</li> </ul>                       |
| <b>Van Es, 2015</b>   | Diagnostic cytopathology; gynecology, fine needle aspiration, exfoliative fluid | NR                                                                 | Smart Sparrow | Designed Adaptivity    | To improve learning effectiveness.                                          | During intermediate problem-solving steps. | User responses                             | <ul style="list-style-type: none"> <li>• Content</li> <li>• Navigation</li> <li>• Presentation</li> <li>• Multimedia</li> </ul>                  |
| <b>Van Es, 2016</b>   | Diagnostic cytopathology; gynecology, fine needle aspiration, exfoliative fluid | NR                                                                 | Smart Sparrow | Designed Adaptivity    | To improve learning effectiveness.                                          | During intermediate problem-solving steps. | User responses                             | <ul style="list-style-type: none"> <li>• Content</li> <li>• Navigation</li> <li>• Presentation</li> <li>• Multimedia</li> <li>• Tools</li> </ul> |

1  
2  
3  
4  
5  
6  
7  
8  
9  
10  
11  
12  
13  
14  
15  
16  
17  
18  
19  
20  
21  
22  
23  
24  
25  
26  
27  
28  
29  
30  
31  
32  
33  
34  
35  
36  
37  
38  
39  
40  
41  
42  
43  
44  
45  
46  
47

|                   |                                            |                       |               |                        |                                                        |                                            |                                            |                                                                                                         |
|-------------------|--------------------------------------------|-----------------------|---------------|------------------------|--------------------------------------------------------|--------------------------------------------|--------------------------------------------|---------------------------------------------------------------------------------------------------------|
| <b>Wong, 2015</b> | Diagnostic imaging; chest X-rays, CT scans | Cognitive Load Theory | Smart Sparrow | Designed Adaptivity    | To improve learning effectiveness.                     | During intermediate problem-solving steps. | User responses                             | <ul style="list-style-type: none"> <li>• Content</li> </ul>                                             |
| <b>Wong, 2017</b> | Fetal heart rate interpretation            | Perceptual Learning   | PALM          | Algorithmic Adaptivity | To improve response accuracy and response time.        | After each clinical case.                  | User response accuracy, user response time | <ul style="list-style-type: none"> <li>• Content</li> <li>• Navigation</li> <li>• Multimedia</li> </ul> |
| <b>Woo, 2006</b>  | Hemodynamics; baroreceptor reflex          | NR                    | CIRCSIM-Tutor | Algorithmic Adaptivity | To improve knowledge related to problem-solving tasks. | After each user response.                  | User knowledge, user responses             | <ul style="list-style-type: none"> <li>• Content</li> <li>• Navigation</li> <li>• Tools</li> </ul>      |

362

363

364

1  
2  
3 365 We propose 5 subdomains that emerged from the review to characterize the adaptivity process of  
4  
5 366 AEEs reported in the 21 studies: adaptivity method, adaptivity goals, adaptivity timing,  
6  
7 367 adaptivity factors and adaptivity types.  
8  
9

### 10 368 **First Subdomain: Adaptivity Method**

11  
12  
13 369 This subdomain relates to the method of adaptivity that dictates how the AEE adapts instruction  
14  
15 370 to a learner. As we previously described, there are two main methods of adaptivity: *designed*  
16  
17 371 *adaptivity* and *algorithmic adaptivity*. The first is based on the expertise of the educator who  
18  
19 372 specifies how technology will react in a particular situation on the basis of the “if THIS, then  
20  
21 373 THAT” approach. The second refers to use of algorithms that will determine, for instance, the  
22  
23 374 extent of the learner’s knowledge and the optimal instructional sequence. In this review, 11 AEEs  
24  
25 375 employed designed adaptivity<sup>36 38 41-44 47-50 57</sup>, and 9 AEEs employes algorithmic adaptivity<sup>33 37 39</sup>  
26  
27 376 <sup>51 52 54-56 58</sup>. The adaptivity method wasn’t specified in one study<sup>40</sup>.  
28  
29  
30  
31

### 32 377 **Second Subdomain: Adaptivity Goals**

33  
34  
35 378 This subdomain relates to the purpose of the adaptivity process within the AEE. For most AEEs,  
36  
37 379 the adaptivity process aims primarily to increase the efficacy and/or efficiency of knowledge  
38  
39 380 acquisition and skills development relative to other training methods<sup>32 35 36 38-45 47-49 51</sup>. For  
40  
41 381 instance, several AEEs aimed to increase the diagnostic accuracy and reporting performance of  
42  
43 382 medical students and residents<sup>32-34 37 46 52</sup>. In one study, the goal of adaptivity was to modify  
44  
45 383 behavioral predictors and behavior in nurses<sup>50</sup>. In cases where two adaptive AEEs with certain  
46  
47 384 variations in their techno-pedagogical design are compared with each other, the adaptivity  
48  
49 385 process generally aims at improving the metacognitive and cognitive processes related to learning  
50  
51  
52 386 <sup>32 33 35</sup>.  
53  
54  
55  
56  
57  
58  
59  
60

### 387 Third Subdomain: Adaptivity Timing

388 This subdomain relates to *when* the adaptivity occurs during the learning process with the AEE.

389 In 19 out of 21 studies, the adaptivity occurred throughout the training with AEE, usually after an  
390 answer to a question or during intermediate problem-solving steps. However, in two studies,  
391 adaptivity was only implemented at the beginning of the training with the AEE following survey  
392 responses<sup>38 50</sup>.

### 393 Fourth Subdomain: Adaptivity Factors

394 This subdomain relates to the learner-related data (variables) upon which the adaptivity process is  
395 based. The most frequently targeted variable is the learner's scores after an assessment or a  
396 question within the AEE (e.g., knowledge/skills scores, response accuracy scores)<sup>38-43 45-47 49 51 52</sup>.  
397 Other frequently targeted variables include the learner's actions during its use of the AEE (e.g.,  
398 results of problem-solving tasks, results of reporting tasks, requests for help)<sup>32-35 37</sup>, and the  
399 learner's response time regarding a specific question or task<sup>46 51 52</sup>.

### 400 Fifth Subdomain: Adaptivity Types

401 The final subdomain relates to which types of adaptivity are mobilized in the AEE: content,  
402 navigation, multimedia, presentation and tools. In the context of this review, the adaptivity types  
403 are based upon the work of Knutov and colleagues<sup>12</sup>. Overall, 17 out of 21 (81%) AEEs  
404 examined integrated more than one type of adaptivity. *Content adaptivity* was the most used  
405 adaptivity type; it was implemented in all but one AEEs reviewed (n=20). Content adaptivity  
406 aims to adapt the textual information (curriculum content) to the learner's profile through  
407 different mechanisms and to different degrees<sup>12</sup>. *Navigation adaptivity* was the second most used  
408 adaptivity type (n=14). Navigation can be adapted in two ways; it can be enforced or suggested.

1  
2  
3 409 When enforced, an optimal personalized learning path is determined for the learner by an expert  
4  
5 410 educator or by the algorithms within the AEE. When suggested, there are several personalized  
6  
7 411 learning paths available to each learner, who can determine the path he prefers himself<sup>12</sup>. Most  
8  
9 412 reviewed studies included AEEs with enforced navigation, with one optimal personalized  
10  
11 413 learning path being determined by an expert educator or by the algorithm. *Multimedia adaptivity*  
12  
13 414 was the third most used adaptivity type (n=11). This adaptivity type, much like content adaptivity  
14  
15 415 which relates to textual information, implies the adaptivity of the multimedia elements of the  
16  
17 416 training such as videos, pictures, models, to the learner's profile. *Presentation adaptivity* was the  
18  
19 417 fourth most used adaptivity type (n=9). It implies the adaptivity of the layout of the page to the  
20  
21 418 digital device used, or to the learner's profile. *Tools adaptivity* was the least used adaptivity type  
22  
23 419 (n=8). This technique results in providing a different set of features or learning strategies for  
24  
25 420 different types of learners, such as different interfaces for problem solving, and knowledge  
26  
27 421 representation.

### 422 **Risk of Bias Assessment**

37 423 Results of included studies for the risk of bias assessment are presented in **Figure 2** and **Figure 3**.  
38  
39 424 In  $\geq 75\%$  of studies, biases related to similarity of baseline outcome measurements, blinding of  
40  
41 425 outcome assessment and selective reporting of outcomes were low. Moreover, in  $\geq 50\%$  of  
42  
43 426 studies, biases related to contamination were low. Regarding the blinding of outcome assessment,  
44  
45 427 in most studies, review authors judged that the outcomes of interest and the outcome  
46  
47 428 measurement were not likely to be influenced by the lack of blinding, since studies had objective  
48  
49 429 measures, i.e. an evaluative test of knowledge or skills. Regarding contamination bias, review  
50  
51 430 authors scored studies at high risk if they had a crossover design.

1  
2  
3 431 However, in  $\geq 50\%$  of studies, biases related to random sequence generation, allocation  
4  
5 432 concealment, similarity of baseline characteristics, similarity of baseline characteristics, blinding  
6  
7 433 of participants and personnel, and incomplete outcome data were unclear or high. Regarding  
8  
9 434 random sequence generation, an important number of studies did not report on the method of  
10  
11 435 randomization used by investigators. As per Cochrane recommendations, all eligible studies  
12  
13 436 were included in the meta-analysis, regardless of the risk of bias assessment. Indeed, since almost  
14  
15 437 all studies scored overall at unclear risk of bias, Cochrane suggests to present an estimated  
16  
17 438 intervention effect based on all available studies, together with a description of the risk of bias in  
18  
19 439 individual domains <sup>30</sup>.

20  
21  
22  
23  
24  
25 440 [Insert Figure 2]

26  
27  
28 441 [Insert Figure 3]

## 29 30 31 442 **Quantitative Results**

### 32 33 34 443 **Efficacy of AEEs versus other educational interventions in improving knowledge**

35  
36  
37 444 The pooled ES (standardized mean difference [SMD] 0.70; 95% confidence interval [CI] -0.08-  
38  
39 445 1.49;  $Z = 1.76$ ,  $P = 0.08$ ) of AEEs compared to other educational interventions in improving  
40  
41 446 knowledge suggests a medium to large effect (see **Figure 4**). However, this result is not  
42  
43 447 statistically significant. Significant statistical heterogeneity was observed among studies ( $I^2$   
44  
45 448 =97%,  $P < .00001$ ), and individual ESs ranged from -1.10 to 3.05. One study in particular <sup>45</sup>  
46  
47 449 reported a negative ES, but the difference between groups in knowledge scores was statistically  
48  
49 450 nonsignificant. Moreover, while participants using the AEE in the experimental group reported  
50  
51 451 the same knowledge scores as participants in the control group at the end of study, time spent on  
52  
53 452 instruction was reduced by 18% with the AEE compared to the nonadaptive e-learning  
54  
55  
56  
57  
58  
59  
60



1  
2  
3 453 environment, thus improving learning efficiency<sup>45</sup>. When that study<sup>45</sup> is removed from the meta-  
4  
5 454 analysis, the pooled ES becomes statistically significant (SMD 1.07; 95% CI 0.28-1.85; Z =2.67,  
6  
7 455 *P* 0.008).

9  
10  
11 456 [Insert Figure 4]  
12  
13

#### 14 457 Efficacy of AEEs versus other educational interventions in improving skills

15  
16  
17 458 As we considered ESs larger than 0.8 to be large<sup>59</sup>, the pooled ES (SMD 1.19; 95% CI 0.59-  
18  
19 459 1.79; Z =3.88, *P* 0.0001) of AEEs compared to other educational interventions in improving  
20  
21 460 skills suggests a significantly large effect (see **Figure 5**). Statistical heterogeneity was lower than  
22  
23 461 in previous analyses, but was still significant ( $I^2$  =89%, *P* <.00001). Individual ESs ranged from  
24  
25 462 0.17 to 2.87.

26  
27  
28  
29 463 [Insert Figure 5]  
30  
31

#### 32 464 Quality of the Evidence

33  
34  
35 465 The quality of evidence table produced with GRADE, as well as the justifications for each  
36  
37 466 decision, is presented in **Supplementary File 3** (GRADE quality of evidence levels: very low, low,  
38  
39 467 moderate, high). For knowledge, the quality of evidence was deemed to be very low. More  
40  
41 468 precisely, risk of bias was deemed serious, inconsistency serious, indirectness not serious, and  
42  
43 469 imprecision serious. For skills, the quality of evidence was deemed to be low. More precisely,  
44  
45 470 risk of bias was deemed serious, inconsistency serious, indirectness not serious, and imprecision  
46  
47 471 serious.  
48  
49  
50  
51  
52  
53  
54  
55  
56  
57  
58  
59  
60

## 472 DISCUSSION

### 473 Principal Findings

474 This is the first systematic review and meta-analysis to evaluate the efficacy of AEEs in health  
475 professionals and students. We identified 21 relevant studies published since 2003, 17 of which  
476 assessed an AEE versus another educational intervention (large-group classroom instruction,  
477 nonadaptive e-learning environment or paper-based learning), and 4 of which assessed 2 AEEs  
478 with design variations head-to-head. When compared with other educational interventions, AEEs  
479 were associated with statistically significant improvements in learning outcomes in 12 out of 17  
480 studies. Pooled ESs were medium to large for knowledge and large for skills, but only the latter  
481 was associated with a statistically significant effect. Statistical heterogeneity was high in all  
482 analyses. However, this finding is consistent with other meta-analyses in the field of medical  
483 education that also reported high heterogeneity across studies<sup>8 60 61</sup>. A small number of eligible  
484 studies prohibited us from performing subgroup analyses which could have helped in explaining  
485 the source of the heterogeneity. The quality of evidence for all comparisons was either low or  
486 very low. Therefore, while we believe the results support the potential of AEEs for the education  
487 of health professionals and students, we recommend interpreting the ESs with caution.

### 488 Comparison with Other Studies

489 To our knowledge, no previous systematic review and meta-analysis has specifically assessed the  
490 efficacy of AEEs in improving learning outcomes in health professionals and students, or any  
491 other population. However, interestingly, since the 1990's there has been a strong research  
492 interest in the field of AEEs with algorithmic adaptivity (also known as intelligent learning  
493 environments [IEEs] or intelligent tutoring systems [ITSs]) into elementary, high school and

1  
2  
3 494 postsecondary education for multiple subjects<sup>17</sup>. Thus, multiple meta-analyses have been  
4  
5 495 conducted with regard to AEEs in that setting.  
6  
7

8 496 Steenbergen-Hu and Cooper<sup>15</sup> reported a mean ES of 0.35 of AEEs with algorithmic adaptivity  
9  
10 497 on learning outcomes in college students when compared to all other types of educational  
11  
12 498 interventions. The mean ES was 0.37 when the comparator was large-group classroom  
13  
14 499 instruction, 0.35 when the comparator was nonadaptive e-learning, and 0.47 when the comparator  
15  
16 500 was textbooks or workbooks<sup>15</sup>.  
17  
18

19  
20 501 Ma, et al.<sup>18</sup> reported a mean ES of 0.42 of AEEs with algorithmic adaptivity on learning  
21  
22 502 outcomes in elementary, high school and postsecondary students when compared to large-group  
23  
24 503 classroom instruction. The mean ES was 0.57 when the comparator was nonadaptive e-learning,  
25  
26 504 and 0.35 when the comparator was textbooks or workbooks. Interestingly, the mean ES was  
27  
28 505 higher for studies which assessed an AEE in biology and physiology (0.59) and in humanities and  
29  
30 506 social science (0.63) than in studies which assessed an AEE in mathematics (0.35) and physics  
31  
32 507 (0.38)<sup>18</sup>.  
33  
34  
35  
36  
37

38 508 Kulik and Fletcher<sup>17</sup> reported a mean ES of 0.65 of AEEs with algorithmic adaptivity on  
39  
40 509 learning outcomes in elementary, high school, and postsecondary students when compared to  
41  
42 510 large-group classroom instruction. Education areas in this review were diverse (e.g.,  
43  
44 511 mathematics, computer science, physics), but none were related to health sciences. Interestingly,  
45  
46 512 the mean ES was 0.78 for studies up to 80 participants, and 0.30 for studies with more than 250  
47  
48 513 participants. Moreover, the mean ES for studies conducted with elementary and high school  
49  
50 514 students was 0.44, compared to 0.75 for studies conducted with postsecondary students<sup>17</sup>.  
51  
52  
53  
54  
55  
56  
57  
58  
59  
60

1  
2  
3 515 Thus, in light of the results of these meta-analyses, the ES reported in our review may appear  
4  
5 516 high. However, our review looked more specifically into the efficacy of AEEs in improving  
6  
7 517 learning outcomes in health professionals and students. This is significant since, in the meta-  
8  
9 518 analyses of Steenbergen-Hu and Cooper <sup>15</sup>, Ma, et al. <sup>18</sup>, and Kulik and Fletcher <sup>17</sup>, AEEs seem to  
10  
11 519 be more effective in postsecondary students <sup>17 18</sup> and for learning subjects related to biology,  
12  
13 520 physiology and social science <sup>18</sup>. Moreover, previous meta-analyses focused on the efficacy of  
14  
15 521 AEEs in improving procedural and declarative knowledge, and did not report on the efficacy on  
16  
17 522 AEEs in improving skills. This is important since AEEs may be more effective for providing  
18  
19 523 tailored guidance and coaching for developing skills regarding complex clinical interventions,  
20  
21 524 rather than learning factual knowledge, which generates less cognitive load <sup>62 63</sup>.

## 27 525 **Implications for Practice and Research**

28  
29  
30 526 This review provides important implications for the design and development of AEEs for health  
31  
32 527 professionals and students. Table 3 presents 8 practical considerations for the design and  
33  
34 528 development of adaptive e-learning environments based on the results of this systematic review  
35  
36 529 for educators and educational researchers.

40 530 **Table 3. Practical considerations for the design and development of adaptive e-learning**  
41 531 **environments.**

| Practical considerations                  | Explanations                                                                                                                                                                                                                                                                                                                                                                                 |
|-------------------------------------------|----------------------------------------------------------------------------------------------------------------------------------------------------------------------------------------------------------------------------------------------------------------------------------------------------------------------------------------------------------------------------------------------|
| <b>Developing the Educational Content</b> | <ul style="list-style-type: none"> <li>Given the adaptivity and the different learning pathways inherent to adaptive e-learning environments (AEEs), it is necessary to develop more pedagogical content (e.g. 60 minutes of learning) to reach the planned duration of each adaptive e-learning session (e.g. 30 minutes of learning).</li> </ul>                                           |
| <b>Selecting a Theoretical Framework</b>  | <ul style="list-style-type: none"> <li>Selecting a theoretical framework coherent with the underlining principles of adaptivity of AEEs is crucial. These frameworks can be related to human cognition (e.g. Cognitive Load Theory, Cognitive Tutoring), behavior change (e.g. Transtheoretical model, I-Change Model) or learning (e.g. Perceptual Learning, Situated Learning).</li> </ul> |

|                                                                                            |                                                                                                                                                                                                                                                                                                                                                                                                                                                                                                                                                                                                                                                                                                                                                                                                                                      |
|--------------------------------------------------------------------------------------------|--------------------------------------------------------------------------------------------------------------------------------------------------------------------------------------------------------------------------------------------------------------------------------------------------------------------------------------------------------------------------------------------------------------------------------------------------------------------------------------------------------------------------------------------------------------------------------------------------------------------------------------------------------------------------------------------------------------------------------------------------------------------------------------------------------------------------------------|
| <b>Selecting the Adaptivity Method</b>                                                     | <ul style="list-style-type: none"> <li>• Selecting the adaptivity method refers to how the AEE will adapt its instructional sequence. There are two main adaptivity methods:             <ul style="list-style-type: none"> <li>○ <i>Designed adaptivity</i> is based on the expertise of the educator who designs personalized pathways to guide learners to learning content mastery;</li> <li>○ <i>Algorithmic adaptivity</i> is based on different algorithms to determine, for instance, the extent of the learner's knowledge and the optimal instructional pathway.</li> </ul> </li> </ul>                                                                                                                                                                                                                                    |
| <b>Selecting the Adaptivity Goal(s)</b>                                                    | <ul style="list-style-type: none"> <li>• Selecting the adaptivity goal(s) is important, since it will dictate how the instruction will be adapted in the AEE. The goal of adaptivity within an AEE may be to increase learning effectiveness, increase learning efficiency, modify behavioral predictors, or improve cognitive/metacognitive processes related to learning.</li> </ul>                                                                                                                                                                                                                                                                                                                                                                                                                                               |
| <b>Selecting the Adaptivity Timing</b>                                                     | <ul style="list-style-type: none"> <li>• Selecting the timing of adaptivity within an AEE relates to <i>when</i> the adaptivity occurs during the learning process. Adaptivity can be implemented at the beginning of the training only, or throughout the training. Adaptivity timing is closely linked to which adaptivity factor(s) are targeted in learners.</li> </ul>                                                                                                                                                                                                                                                                                                                                                                                                                                                          |
| <b>Selecting the Adaptivity Factor(s)</b>                                                  | <ul style="list-style-type: none"> <li>• Adaptivity factors are essentially data upon which the adaptivity process is based. These data can be related to the learner's performance (e.g. knowledge, skills), his behavior / actions on the page (e.g. response time, requests for help), his overall learning path on the platform, or any other variables of interest in the learner.</li> </ul>                                                                                                                                                                                                                                                                                                                                                                                                                                   |
| <b>Selecting the Adaptivity Type(s)</b>                                                    | <ul style="list-style-type: none"> <li>• Multiple types of adaptivity can be implemented in an AEE:             <ul style="list-style-type: none"> <li>○ <i>Content adaptivity</i> refers to the adaptation of the textual information;</li> <li>○ <i>Navigation adaptivity</i> refers to the adaptation of the curriculum sequence;</li> <li>○ <i>Presentation adaptivity</i> refers to the adaptation of layout of the screen to the digital device used, or to the learner's profile;</li> <li>○ <i>Multimedia adaptivity</i> refers to the adaptation of multimedia elements of the training such as videos, pictures, models;</li> <li>○ <i>Tools adaptivity</i> refers to the adaptation of training features, learning strategies or learning assessment methods (e.g. interface for problem solving).</li> </ul> </li> </ul> |
| <b>Determining your technical resources and selecting the adaptive e-learning platform</b> | <ul style="list-style-type: none"> <li>• After the content has been developed, the theoretical framework has been selected and the decisions related to the different subdomains adaptivity have been made, it is crucial to determine your technical resources and evaluate preexisting adaptive e-learning software to determine if it meets your needs and goals. If you plan to employ a specialist or team to develop the platform, estimate development cost and timeline.</li> </ul>                                                                                                                                                                                                                                                                                                                                          |

532 This review also provides several key insights for future research. In terms of *population*, future  
 533 research should focus on assessing AEEs with health professionals in practice, such as registered  
 534 nurses and physicians, rather than students in these disciplines. This could provide key insights  
 535 into how AEEs can impact clinical behavior and, ultimately, patient outcomes. In addition,  
 536 investigators should target larger sample sizes. In terms of *interventions*, researchers should  
 537 report more clearly on adaptivity methods, goals, timing, factors and types. Moreover,  
 538 researchers should provide additional details regarding the underlining algorithms allowing the

1  
2  
3 539 adaptivity process in order to ensure replicability of findings. Regarding *comparators*, this review  
4  
5 540 suggests there is a need for additional research using traditional comparators (i.e., large group  
6  
7 541 classroom instruction) and more specific comparators (i.e., adaptive e-learning environment with  
8  
9 542 design variations). Regarding *outcomes* and outcome measures, researchers should use validated  
10  
11 543 measurement tools of knowledge, skills, and clinical behavior to facilitate knowledge synthesis.  
12  
13  
14 544 Moreover, the very low number of studies assessing the impact of AEEs on health professionals'  
15  
16 545 and students' clinical behavior demonstrates the need for further research with higher-level  
17  
18 546 outcomes. Finally, in terms of *study designs*, researchers should focus on research designs  
19  
20 547 allowing the assessment of the impact of multiple educational design variations and adaptivity  
21  
22 548 types within one study, such as factorial experiments.  
23  
24  
25  
26

### 27 549 **Strengths and Limitations**

28  
29  
30 550 Strengths of this systematic review and meta-analysis include the prospective registration and  
31  
32 551 publication of a protocol based on rigorous methods in accordance with Cochrane and PRISMA  
33  
34 552 guidelines; the exhaustive search in all relevant databases; the independent screening of the titles,  
35  
36 553 abstracts and full-text of studies; the assessment of each included studies' risk of bias using  
37  
38 554 EPOC Cochrane guidelines; and the assessment of the quality of evidence for each individual  
39  
40 555 outcome using the GRADE methodology.  
41  
42  
43  
44

45 556 Our review also has limitations to consider. First, outcome measures varied widely across  
46  
47 557 studies. To address this issue, we conducted the meta-analysis using the SMD. Using the SMD  
48  
49 558 allowed us to standardize the results of studies to a uniform scale before pooling them. Review  
50  
51 559 authors judged that using the SMD was the best option for this review, as it is the current practice  
52  
53 560 in the field of knowledge synthesis in medical education<sup>6 60</sup>.  
54  
55  
56  
57  
58  
59  
60

1  
2  
3 561 Second, there was high inconsistency among study results, which we can mostly attribute to  
4  
5 562 differences in populations, AEE design, research methods, and outcomes. This resulted in  
6  
7 563 sometimes widely differing estimates of effect. To partly address this issue, we used a random-  
8  
9 564 effects model for the meta-analysis, which assumes that the effects estimated in the studies are  
10  
11 565 different and follow a distribution<sup>30</sup>. However, since a random-effects model awards more  
12  
13 566 weight to smaller studies to learn about the distribution of effects, it could potentially exacerbate  
14  
15 567 the effects of the bias in these studies<sup>30</sup>.  
16  
17  
18  
19  
20 568 Finally, publication bias could not be assessed by the means of a funnel plot since there were less  
21  
22 569 than 10 studies included in the meta-analysis.  
23  
24

## 25 570 **CONCLUSIONS**

26  
27  
28  
29 571 Adaptive e-learning has significant potential to increase the effectiveness and efficiency of  
30  
31 572 learning in health professionals and students. Through the different sub-domains of the adaptivity  
32  
33 573 process (i.e. method, goals, timing, factors, types), AEEs can take into account the particularities  
34  
35 574 inherent to each learner. This systematic review and meta-analysis underlines the potential of  
36  
37 575 AEEs for improving knowledge and skills in health professionals and students in comparison  
38  
39 576 with other educational interventions, such as nonadaptive e-learning environments and large-  
40  
41 577 group classroom learning, across a range of topics. However, evidence was either of low or very  
42  
43 578 low quality and heterogeneity was high across populations, interventions, comparators, and  
44  
45 579 outcomes. Thus, additional comparative studies assessing the efficacy of AEEs in health  
46  
47  
48  
49 580 professionals and students are needed to strengthen the quality of evidence .  
50  
51  
52  
53  
54  
55  
56  
57  
58  
59  
60

## 581 AUTHOR CONTRIBUTIONS

582 All review authors contributed to at least one aspect of each of the four criteria for authorship  
583 defined by the International Committee for Medical Journal Editors (ICJME).

584 G.F. contributed to the conception and design of the review, to the acquisition and analysis of  
585 data, and to the interpretation of results. Moreover, G.F. drafted the initial manuscript. S.C.  
586 contributed to the conception and design of the review, and to the interpretation of results. M.-  
587 A.M.-C. contributed to the conception and design of the review, to the acquisition of data, and  
588 interpretation of results. T.M. contributed to the conception and design of the review, to the  
589 acquisition of data, and to the interpretation of results. M.-F.D. contributed to the conception and  
590 design of the review, to the acquisition of data, and to the interpretation of results. G.M.-D.  
591 contributed to the conception and design of the review, and to the interpretation of results. J.C.  
592 contributed to the interpretation of results. M.-P.G. contributed to the interpretation of results.  
593 V.D. contributed to the interpretation of results.

594 All review authors contributed to manuscript writing, critically revised the manuscript, gave final  
595 approval, and agreed to be accountable for all aspects of work, ensuring integrity and accuracy.

## 596 DATA SHARING STATEMENT

597 No additional data available.

## 598 ACKNOWLEDGEMENTS

599 G.F. was supported by the Vanier Canada Graduate Scholarship (Canadian Institutes of Health  
600 Research), a doctoral fellowship from Quebec's Healthcare Research Fund, the AstraZeneca and  
601 Dr. Kathryn J. Hannah scholarships from the Canadian Nurses Foundation, a doctoral scholarship



1  
2  
3 602 from the Montreal Heart Institute Foundation, a doctoral scholarship from Quebec's Ministry of  
4  
5 603 Higher Education, and multiple scholarships from the Faculty of Nursing at the University of  
6  
7 604 Montreal. M.-A.M.-C. was supported by a doctoral fellowship from Quebec's Healthcare  
8  
9 605 Research Fund, a doctoral scholarship from the Montreal Heart Institute Foundation, a doctoral  
10  
11 606 scholarship from Quebec's Ministry of Higher Education, and multiple scholarships from the  
12  
13 607 Faculty of Nursing at the University of Montreal. T.M. was supported by a postdoctoral  
14  
15 608 fellowship from Quebec's Healthcare Research Fund, a postdoctoral scholarship from the  
16  
17 609 Montreal Heart Institute Foundation. M.-F.D. was supported by a doctoral fellowship from  
18  
19 610 Canada's Social Sciences and Humanities Research Council, and a scholarship from the Center  
20  
21 611 for Innovation in Nursing Education.  
22  
23  
24  
25  
26

## 27 612 **FIGURE LEGENDS**

28  
29  
30 613 Figure 1. PRISMA Study Flow Diagram.  
31  
32

33 614 Figure 2. Risk of bias summary: review authors' judgements about each risk of bias item for each  
34  
35 615 included study.  
36  
37

38  
39 616 Figure 3. Risk of bias graph: review authors' judgements about each risk of bias item presented as  
40  
41 617 percentages across all included studies.  
42  
43

44 618 Figure 4. Forest plot representing the meta-analysis of the efficacy of adaptive e-learning versus  
45  
46 619 other educational interventions in improving knowledge.  
47  
48

49 620 Figure 5. Forest plot representing the meta-analysis of the efficacy of adaptive e-learning versus  
50  
51 621 other educational interventions in improving skills.  
52  
53  
54  
55  
56  
57  
58  
59  
60

## 622 REFERENCES

- 623 1. Clark R, Mayer R. E-Learning and the Science of Instruction: Proven Guidelines for  
624 Consumers and Designers of Multimedia Learning. 4 ed. Hoboken, NJ: John Wiley &  
625 Sons 2016.
- 626 2. Cheng B, Wang M, Mørch AI, et al. Research on e-learning in the workplace 2000–2012: A  
627 bibliometric analysis of the literature. *Educational Research Review* 2014;11:56-72. doi:  
628 10.1016/j.edurev.2014.01.001
- 629 3. Fontaine G, Cossette S, Heppell S, et al. Evaluation of a web-based e-learning platform for  
630 brief motivational interviewing by cardiovascular care nurses: a pilot study. *Journal of*  
631 *Medical Internet Research* 2016;8(18):e224. doi: 10.2196/jmir.6298 [published Online  
632 First: August 18th 2016]
- 633 4. George PP, Papachristou N, Belisario JM, et al. Online eLearning for undergraduates in health  
634 professions: A systematic review of the impact on knowledge, skills, attitudes and  
635 satisfaction. *J Glob Health* 2014;4(1):010406. doi: 10.7189/jogh.04.010406
- 636 5. Lahti M, Hatonen H, Valimaki M. Impact of e-learning on nurses' and student nurses  
637 knowledge, skills, and satisfaction: a systematic review and meta-analysis. *Int J Nurs Stud*  
638 2014;51(1):136-49. doi: 10.1016/j.ijnurstu.2012.12.017 [published Online First:  
639 2013/02/07]
- 640 6. Cook, Levinson AJ, Garside S, et al. Internet-based learning in the health professions: a meta-  
641 analysis. *Journal of the American Medical Association* 2008;300(10):1181-96. doi:  
642 10.1001/jama.300.10.1181
- 643 7. Sinclair PM, Kable A, Levett-Jones T, et al. The effectiveness of Internet-based e-learning on  
644 clinician behaviour and patient outcomes: A systematic review. *International Journal of*  
645 *Nursing Studies* 2016;57:70-81. doi: 10.1016/j.ijnurstu.2016.01.011
- 646 8. Voutilainen A, Saaranen T, Sormunen M. Conventional vs. e-learning in nursing education: A  
647 systematic review and meta-analysis. *Nurse Education Today* 2017;50:97-103. doi:  
648 10.1016/j.nedt.2016.12.020
- 649 9. Ellaway RH, Pusic MV, Galbraith RM, et al. Developing the role of big data and analytics in  
650 health professional education. *Medical Teacher* 2014;36(3):216-22. doi:  
651 10.3109/0142159X.2014.874553
- 652 10. Desmarais MC, Baker RSJ. A review of recent advances in learner and skill modeling in  
653 intelligent learning environments. *User Modeling and User-Adapted Interaction*  
654 2012;22(1-2):9-38. doi: 10.1007/s11257-011-9106-8
- 655 11. Knutov E, De Bra P, Pechenizkiy M. Generic adaptation framework: A process-oriented  
656 perspective. *Journal of Digital Information* 2011;12(1):1-22.

- 1  
2  
3 657 12. Knutov E, De Bra P, Pechenizkiy M. AH 12 years later: A comprehensive survey of adaptive  
4 658 hypermedia methods and techniques. *New Review of Hypermedia and Multimedia*  
5 659 2009;15(1):5-38. doi: 10.1080/13614560902801608  
6  
7 660 13. Akbulut Y, Cardak CS. Adaptive educational hypermedia accommodating learning styles: A  
8 661 content analysis of publications from 2000 to 2011. *Computers & Education*  
9 662 2012;58(2):835-42. doi: 10.1016/j.compedu.2011.10.008  
10  
11 663 14. Brusilovsky P, Peylo C. Adaptive and Intelligent Web-based Educational Systems.  
12 664 *International Journal of Artificial Intelligence in Education* 2003;13:159-72.  
13  
14 665 15. Steenbergen-Hu S, Cooper H. A meta-analysis of the effectiveness of intelligent tutoring  
15 666 systems on college students' academic learning. *Journal of Educational Psychology*  
16 667 2014;106(2):331-47. doi: 10.1037/a0034752  
17  
18 668 16. Steenbergen-Hu S, Cooper H. A meta-analysis of the effectiveness of intelligent tutoring  
19 669 systems on K-12 students' mathematical learning. *Journal of Educational Psychology*  
20 670 2013;105(4):970-87. doi: 1037/a0032447  
21  
22 671 17. Kulik JA, Fletcher JD. Effectiveness of intelligent tutoring systems: A meta-analytic review.  
23 672 *Review of Educational Research* 2015;86(1):42-78. doi: 10.3102/0034654315581420  
24  
25 673 18. Ma W, Adesope OO, Nesbit JC, et al. Intelligent Tutoring Systems and Learning Outcomes:  
26 674 A Meta-Analysis. *Journal of Educational Psychology* 2014;106(4):901-18. doi:  
27 675 10.1037/a0037123  
28  
29 676 19. Evens M, Michael J. One-on-one tutoring by humans and computers. Mahwah, NJ:  
30 677 Psychology Press 2006.  
31  
32 678 20. Strengers Y, Moloney S, Maller C, et al. Beyond behaviour change: practical applications of  
33 679 social practice theory in behaviour change programmes. In: Strengers Y, Maller C, eds.  
34 680 *Social Practices, Interventions and Sustainability*. New York, NY: Routledge 2014:63-77.  
35  
36 681 21. Nesbit JC, Adesope OO, Liu Q, et al. How Effective are Intelligent Tutoring Systems in  
37 682 Computer Science Education? IEEE 14th International Conference on Advanced Learning  
38 683 Technologies (ICALT). Athens, Greece, 2014.  
39  
40 684 22. Cochrane Effective Practice and Organisation of Care (EPOC). EPOC resources for review  
41 685 authors 2017 [Available from: [http://epoc.cochrane.org/resources/epoc-resources-review-](http://epoc.cochrane.org/resources/epoc-resources-review-authors)  
42 686 [authors](http://epoc.cochrane.org/resources/epoc-resources-review-authors).  
43  
44 687 23. Moher D, Shamseer L, Clarke M, et al. Preferred reporting items for systematic review and  
45 688 meta-analysis protocols (PRISMA-P) 2015 statement. *Systematic Reviews* 2015;4(1) doi:  
46 689 10.1186/2046-4053-4-1  
47  
48 690 24. Fontaine G, Cossette S, Maheu-Cadotte MA, et al. Effectiveness of Adaptive E-Learning  
49 691 Environments on Knowledge, Competence, and Behavior in Health Professionals and  
50  
51  
52  
53  
54  
55  
56  
57  
58  
59  
60

- 1  
2  
3 692 Students: A Protocol for a Systematic Review and Meta-Analysis. *JMIR Research*  
4 693 *Protocols* 2017;6(7):e128. doi: 10.2196/resprot.8085  
5  
6 694 25. Moja L, Moschetti I, Cinquini M, et al. Clinical evidence continuous medical education: a  
7 695 randomised educational trial of an open access e-learning program for transferring  
8 696 evidence-based information–ICEKUBE (Italian Clinical Evidence Knowledge Utilization  
9 697 Behaviour Evaluation)–study protocol. *Implementation Science* 2008;3(1):37. doi:  
10 698 10.1186/1748-5908-3-37  
11  
12  
13 699 26. Miller GE. The assessment of clinical skills/competence/performance. *Academic Medicine*  
14 700 1990(Suppl 2):S63-S67.  
15  
16 701 27. EPOC Cochrane Review Group. What study designs should be included in an EPOC review  
17 702 and what should they be called? 2014 [Available from:  
18 703 [https://epoc.cochrane.org/sites/epoc.cochrane.org/files/public/uploads/EPOC%20Study%](https://epoc.cochrane.org/sites/epoc.cochrane.org/files/public/uploads/EPOC%20Study%20Designs%20About.pdf2017)  
19 704 [20Designs%20About.pdf2017](https://epoc.cochrane.org/sites/epoc.cochrane.org/files/public/uploads/EPOC%20Study%20Designs%20About.pdf2017).  
20  
21  
22 705 28. EPOC Cochrane Review Group. Data extraction and management: EPOC Resources for  
23 706 review authors Oslo, Norway: Norwegian Knowledge Centre for the Health Services;  
24 707 2013 [Available from: <http://epoc.cochrane.org/epoc-specific-resources-review-authors>.  
25  
26 708 29. Higgins JP, Thompson SG, Deeks JJ, et al. Measuring inconsistency in meta-analyses. *Bmj*  
27 709 2003;327(7414):557-60. doi: 10.1136/bmj.327.7414.557  
28  
29  
30 710 30. Higgins JPT, Green S. Cochrane Handbook for Systematic Reviews of Interventions Version  
31 711 5.1.0.: The Cochrane Collaboration 2011.  
32  
33 712 31. Guyatt GH, Oxman AD, Vist GE, et al. GRADE: an emerging consensus on rating quality of  
34 713 evidence and strength of recommendations. *BMJ: British Medical Journal*  
35 714 2008;336(7650):924-26. doi: 10.1136/bmj.39489.470347.AD  
36  
37 715 32. Crowley RS, Legowski E, Medvedeva O, et al. Evaluation of an intelligent tutoring system in  
38 716 pathology: effects of external representation on performance gains, metacognition, and  
39 717 acceptance. *J Am Med Inform Assoc* 2007;14(2):182-90. doi: 10.1197/jamia.M2241  
40 718 [published Online First: 2007/01/11]  
41  
42  
43 719 33. El Saadawi GM, Azevedo R, Castine M, et al. Factors affecting feeling-of-knowing in a  
44 720 medical intelligent tutoring system: the role of immediate feedback as a metacognitive  
45 721 scaffold. *Advances in health sciences education : theory and practice* 2010;15(1):9-30.  
46 722 doi: 10.1007/s10459-009-9162-6 [published Online First: 2009/05/13]  
47  
48  
49 723 34. El Saadawi GM, Tseytlin E, Legowski E, et al. A natural language intelligent tutoring system  
50 724 for training pathologists: implementation and evaluation. *Advances in health sciences*  
51 725 *education : theory and practice* 2008;13(5):709-22. doi: 10.1007/s10459-007-9081-3  
52 726 [published Online First: 2007/10/16]  
53  
54  
55  
56  
57  
58  
59  
60

- 1  
2  
3 727 35. Feyzi-Behnagh R, Azevedo R, Legowski E, et al. Metacognitive scaffolds improve self-  
4 728 judgments of accuracy in a medical intelligent tutoring system. *Instr Sci* 2014;42(2):159-  
5 729 81. doi: 10.1007/s11251-013-9275-4 [published Online First: 2014/02/18]  
6  
7 730 36. Casebeer LL, Strasser SM, Spettell CM, et al. Designing tailored Web-based instruction to  
8 731 improve practicing physicians' preventive practices. *J Med Internet Res* 2003;5(3):e20.  
9 732 doi: 10.2196/jmir.5.3.e20 [published Online First: 2003/10/01]  
10  
11 733 37. Aleven V, Kay J, Mostow J, eds. Use of a medical ITS improves reporting performance  
12 734 among community pathologists. *Intelligent Tutoring Systems; 2010; Pittsburgh, PA.*  
13 735 Springer Berlin/Heidelberg.  
14  
15 736 38. Munoz DC, Ortiz A, Gonzalez C, et al. Effective e-learning for health professional and  
16 737 medical students: the experience with SIAS-Intelligent Tutoring System. *Stud Health*  
17 738 *Technol Inform* 2010;156:89-102. [published Online First: 2010/06/15]  
18  
19 739 39. Woo CW, Evens MW, Freedman R, et al. An intelligent tutoring system that generates a  
20 740 natural language dialogue using dynamic multi-level planning. *Artificial Intelligence in*  
21 741 *Medicine* 2006;38(1):25-46. doi: 10.1016/j.artmed.2005.10.004 [published Online First:  
22 742 2005/12/15]  
23  
24 743 40. Hayes-Roth B, Saker R, Amano K. Automating individualized coaching and authentic role-  
25 744 play practice for brief intervention training. *Methods of Information in Medicine*  
26 745 2010;49(3):406-11.  
27  
28 746 41. Samulski TD, Taylor LA, La T, et al. The utility of adaptive eLearning in cervical  
29 747 cytopathology education. *Cancer Cytopathology* 2017:1-7. doi: 10.1002/cncy.21942  
30  
31 748 42. Van Es SL, Kumar RK, Pryor WM, et al. Cytopathology whole slide images and adaptive  
32 749 tutorials for senior medical students: a randomized crossover trial. *Diagn Pathol*  
33 750 2016;11:1. doi: 10.1186/s13000-016-0452-z [published Online First: 2016/01/10]  
34  
35 751 43. Wong V, Smith AJ, Hawkins NJ, et al. Adaptive tutorials versus web-based resources in  
36 752 radiology: a mixed methods comparison of efficacy and student engagement. *Acad Radiol*  
37 753 2015;22(10):1299-307. doi: 10.1016/j.acra.2015.07.002 [published Online First:  
38 754 2015/08/22]  
39  
40 755 44. Lee BC, Ruiz-Cordell KD, Haimowitz SM, et al. Personalized, assessment-based, and tiered  
41 756 medical education curriculum integrating treatment guidelines for atrial fibrillation.  
42 757 *Clinical cardiology* 2017;40(7):455-60. doi: 10.1002/elc.22676  
43  
44 758 45. Cook DA, Beckman TJ, Thomas KG, et al. Adapting web-based instruction to residents'  
45 759 knowledge improves learning efficiency: a randomized controlled trial. *J Gen Intern Med*  
46 760 2008;23(7):985-90. doi: 10.1007/s11606-008-0541-0 [published Online First:  
47 761 2008/07/10]  
48  
49 762 46. Romito BT, Krasne S, Kellman PJ, et al. The impact of a perceptual and adaptive learning  
50 763 module on transoesophageal echocardiography interpretation by anaesthesiology  
51  
52  
53  
54  
55  
56  
57  
58  
59  
60

- 1  
2  
3 764 residents. *Br J Anaesth* 2016;117(4):477-81. doi: 10.1093/bja/aew295 [published Online  
4 765 First: 2017/01/13]  
5  
6 766 47. Van Es SL, Kumar RK, Pryor WM, et al. Cytopathology whole slide images and adaptive  
7 767 tutorials for postgraduate pathology trainees: a randomized crossover trial. *Hum Pathol*  
8 768 2015;46(9):1297-305. doi: 10.1016/j.humphath.2015.05.009 [published Online First:  
9 769 2015/06/22]  
10  
11  
12 770 48. Micheel CM, Anderson IA, Lee P, et al. Internet-Based Assessment of Oncology Health Care  
13 771 Professional Learning Style and Optimization of Materials for Web-Based Learning:  
14 772 Controlled Trial With Concealed Allocation. *J Med Internet Res* 2017;19(7):e265. doi:  
15 773 10.2196/jmir.7506 [published Online First: 2017/07/27]  
16  
17  
18 774 49. Morente L, Morales-Asencio JM, Veredas F. Effectiveness of an e-learning tool for education  
19 775 on pressure ulcer evaluation. International Conference on Health Informatics. Barcelona,  
20 776 Spain, 2013:155-60.  
21  
22 777 50. de Ruijter D, Candel M, Smit ES, et al. The Effectiveness of a Computer-Tailored E-Learning  
23 778 Program for Practice Nurses to Improve Their Adherence to Smoking Cessation  
24 779 Counseling Guidelines: Randomized Controlled Trial. *Journal of Medical Internet*  
25 780 *Research* 2018;20(5) doi: 10.2196/jmir.9276  
26  
27  
28 781 51. Adaptive Perceptual Learning in Electrocardiography: The Synergy of Passive and Active  
29 782 Classification. 37th Annual Conference of the Cognitive Science Society; 2015;  
30 783 Pasadena, CA.  
31  
32 784 52. Wong MS, Krasne S. Use of a Perceptual Adaptive Learning Module Results in Improved  
33 785 Accuracy and Fluency of Fetal Heart Rate Categorization by Medical Students. *American*  
34 786 *Journal of Obstetrics & Gynecology* 2017;216(1):S491-S92. doi:  
35 787 10.1016/j.ajog.2016.11.768  
36  
37  
38 788 53. Corbett A, Kauffman L, Maclaren B, et al. A Cognitive Tutor for genetics problem solving:  
39 789 Learning gains and student modeling. *Journal of Educational Computing Research*  
40 790 2010;42(2):219-39. doi: 10.2190/EC.42.2.e  
41  
42 791 54. Crowley RS, Legowski E, Medvedeva O, et al. Evaluation of an intelligent tutoring system in  
43 792 pathology: Effects of external representation on performance gains, metacognition, and  
44 793 acceptance. *Journal of the American Medical Informatics Association* 2007;14(2):182-90.  
45 794 doi: 10.1197/jamia.M2241  
46  
47  
48 795 55. Feyzi-Behnagh R, Azevedo R, Legowski E, et al. Metacognitive scaffolds improve self-  
49 796 judgments of accuracy in a medical intelligent tutoring system. *Instructional Science*  
50 797 2014;42(2):159-81. doi: 10.1007/s11251-013-9275-4  
51  
52 798 56. Romito BT, Krasne S, Kellman PJ, et al. The impact of a perceptual and adaptive learning  
53 799 module on transoesophageal echocardiography interpretation by anaesthesiology  
54 800 residents. *BJA: The British Journal of Anaesthesia* 2016;117(4):477-81. doi:  
55 801 10.1093/bja/aew295  
56  
57  
58  
59  
60

- 1  
2  
3 802 57. Cook, Beckman TJ, Thomas KG, et al. Adapting web-based instruction to residents'  
4 803 knowledge improves learning efficiency. *Journal of General Internal Medicine*  
5 804 2008;23(7):985-90. doi: 10.1007/s11606-008-0541-0  
6  
7 805 58. El Saadawi GM, Tseytlin E, Legowski E, et al. A natural language intelligent tutoring system  
8 806 for training pathologists: Implementation and evaluation. *Advances in health sciences*  
9 807 *education : theory and practice* 2008;13(5):709-22. doi: 10.1007/s10459-007-9081-3  
10 808 [published Online First: 2007/10/16]  
11  
12  
13 809 59. Cohen J. Statistical power analysis for the behavioral sciences. Hillsdale, NJ: L. Erlbaum  
14 810 Associates 1988.  
15  
16 811 60. Cook DA, Hatala R, Brydges R, et al. Technology-enhanced simulation for health professions  
17 812 education. *Journal of the American Medical Association* 2011;306(9):978-88. doi:  
18 813 10.1001/jama.2011.1234  
19  
20  
21 814 61. Liu Q, Peng W, Zhang F, et al. The effectiveness of blended learning in health professions:  
22 815 systematic review and meta-analysis. *Journal of Medical Internet Research*  
23 816 2016;18(1):e2. doi: 10.2196/jmir.4807  
24  
25 817 62. Paas F, Renkl A, Sweller J. Cognitive load theory and instructional design: Recent  
26 818 developments. *Educational Psychologist* 2003;38(1):1-4. doi:  
27 819 10.1207/S15326985EP3801\_1  
28  
29 820 63. Sweller J. Cognitive load during problem solving: Effects on learning. *Cognitive Science*  
30 821 1988;12(2):257-85. doi: 10.1207/s15516709cog1202\_4  
31  
32

822

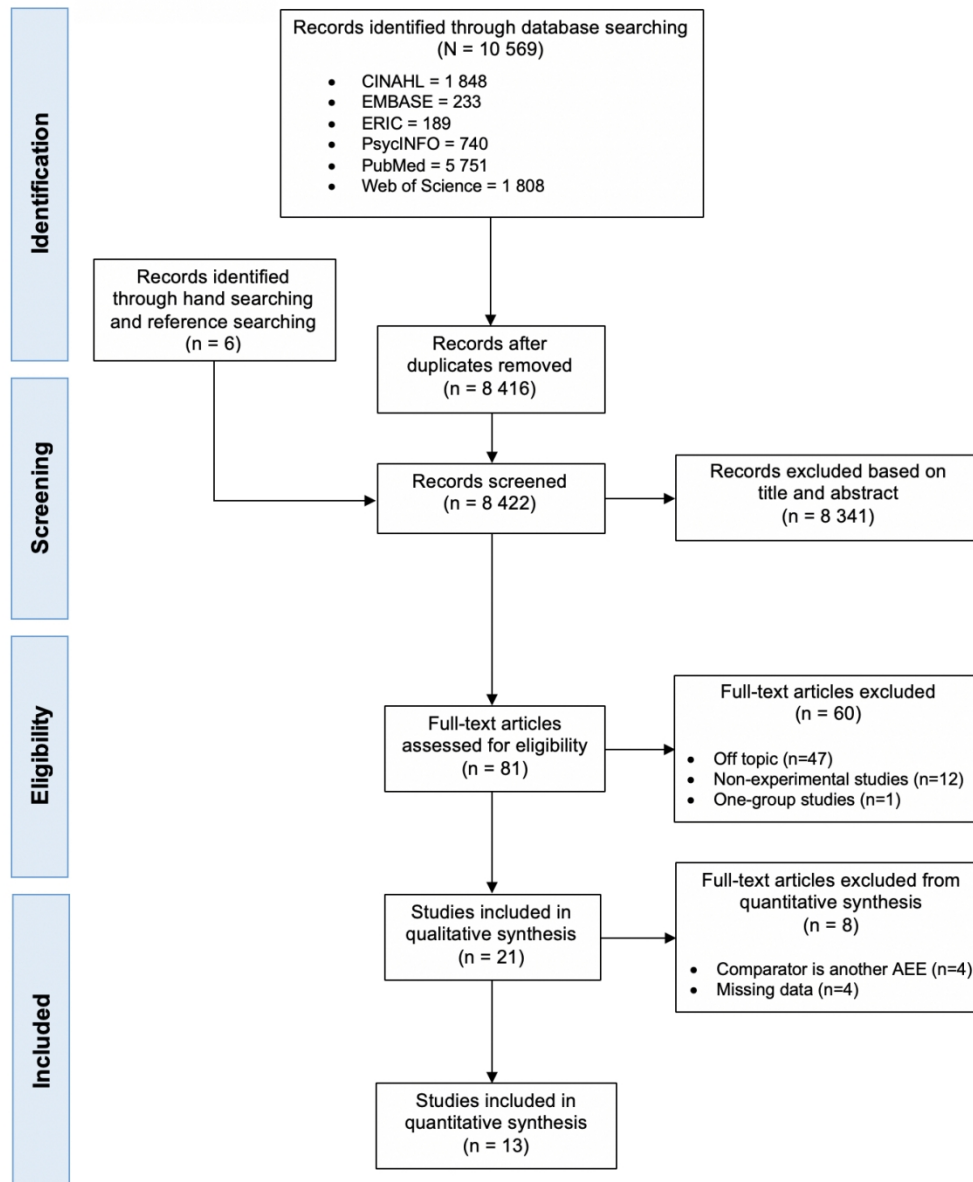

Figure 1. PRISMA study flow diagram.

242x292mm (144 x 144 DPI)



|                    | Random sequence generation (selection bias) | Allocation concealment (selection bias) | Similarity of baseline outcome measurements | Similarity of baseline characteristics | Blinding of participants and personnel (performance) | Blinding of outcome assessment (detection bias) | Incomplete outcome data (attrition bias) | Selective reporting (reporting bias) | Measures against contamination? |
|--------------------|---------------------------------------------|-----------------------------------------|---------------------------------------------|----------------------------------------|------------------------------------------------------|-------------------------------------------------|------------------------------------------|--------------------------------------|---------------------------------|
| Casebeer 2003      | ?                                           | ?                                       | ?                                           | +                                      | ?                                                    | +                                               | ?                                        | ?                                    | +                               |
| Cook 2008          | +                                           | +                                       | ?                                           | +                                      | ?                                                    | +                                               | +                                        | +                                    | +                               |
| Crowley 2007       | ?                                           | ?                                       | +                                           | ?                                      | ?                                                    | +                                               | ?                                        | +                                    | +                               |
| Crowley 2010       | ?                                           | ?                                       | +                                           | +                                      | ?                                                    | +                                               | +                                        | +                                    | +                               |
| de Ruijter 2018    | +                                           | +                                       | +                                           | +                                      | ?                                                    | +                                               | +                                        | +                                    | +                               |
| El Saadawi 2008    | ?                                           | ?                                       | +                                           | +                                      | ?                                                    | +                                               | ?                                        | +                                    | +                               |
| El Saadawi 2010    | ?                                           | ?                                       | +                                           | +                                      | ?                                                    | +                                               | ?                                        | +                                    | +                               |
| Feyzi-Behnagh 2014 | ?                                           | ?                                       | +                                           | +                                      | ?                                                    | +                                               | +                                        | +                                    | +                               |
| Hayes-Roth 2010    | ?                                           | ?                                       | +                                           | +                                      | ?                                                    | +                                               | +                                        | +                                    | +                               |
| Lee 2017           | +                                           | +                                       | +                                           | +                                      | ?                                                    | ?                                               | ?                                        | +                                    | +                               |
| Micheel 2017       | +                                           | +                                       | +                                           | +                                      | ?                                                    | +                                               | +                                        | +                                    | +                               |
| Morente 2013       | +                                           | ?                                       | +                                           | +                                      | ?                                                    | +                                               | +                                        | +                                    | +                               |
| Munoz 2010         | +                                           | +                                       | +                                           | +                                      | ?                                                    | +                                               | ?                                        | +                                    | +                               |
| Romito 2016        | +                                           | +                                       | +                                           | ?                                      | +                                                    | +                                               | +                                        | +                                    | +                               |
| Samulski 2017      | +                                           | ?                                       | +                                           | +                                      | ?                                                    | +                                               | ?                                        | +                                    | +                               |
| Thai 2015          | ?                                           | ?                                       | +                                           | +                                      | ?                                                    | +                                               | ?                                        | +                                    | +                               |
| Van Es 2015        | ?                                           | ?                                       | +                                           | +                                      | ?                                                    | +                                               | +                                        | +                                    | +                               |
| Van Es 2016        | ?                                           | ?                                       | +                                           | +                                      | ?                                                    | +                                               | +                                        | +                                    | +                               |
| Wong 2015          | ?                                           | ?                                       | ?                                           | +                                      | ?                                                    | +                                               | +                                        | ?                                    | +                               |
| Wong 2017          | +                                           | ?                                       | +                                           | +                                      | ?                                                    | +                                               | ?                                        | +                                    | +                               |
| Woo 2006           | ?                                           | ?                                       | +                                           | +                                      | ?                                                    | ?                                               | +                                        | +                                    | +                               |

Figure 2. Risk of bias summary: review authors' judgements about each risk of bias item for each included study.

143x334mm (144 x 144 DPI)

1  
2  
3  
4  
5  
6  
7  
8  
9  
10  
11  
12  
13  
14  
15  
16  
17  
18  
19  
20  
21  
22  
23  
24  
25  
26  
27  
28  
29  
30  
31  
32  
33  
34  
35  
36  
37  
38  
39  
40  
41  
42  
43  
44  
45  
46  
47  
48  
49  
50  
51  
52  
53  
54  
55  
56  
57  
58  
59  
60

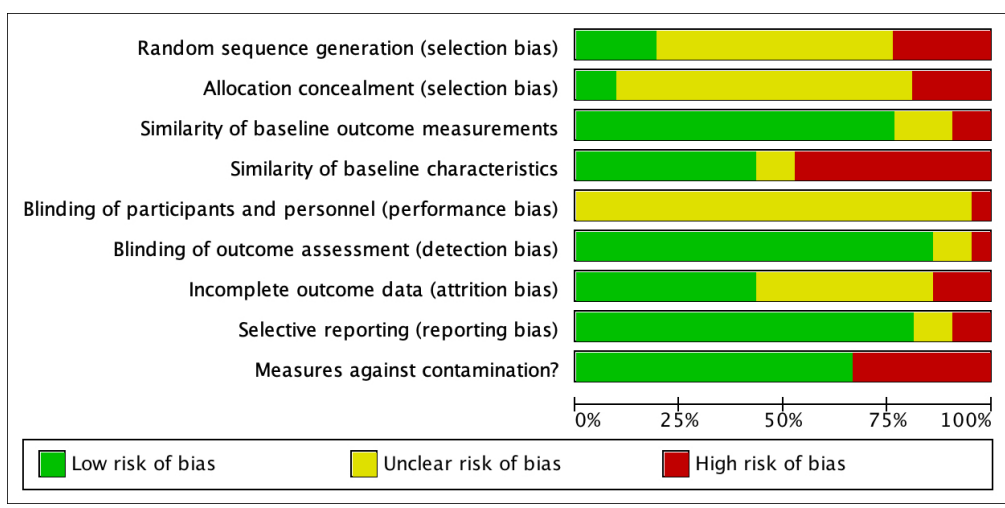

Figure 3. Risk of bias graph: review authors' judgements about each risk of bias item presented as percentages across all included studies.

219x107mm (144 x 144 DPI)

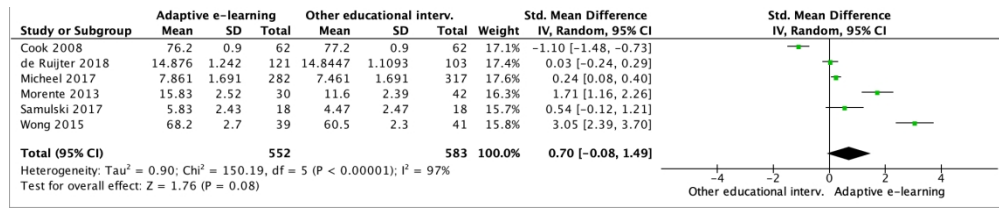

Figure 4. Forest plot representing the meta-analysis of the efficacy of adaptive e-learning versus other educational interventions in improving knowledge.

367x74mm (144 x 144 DPI)

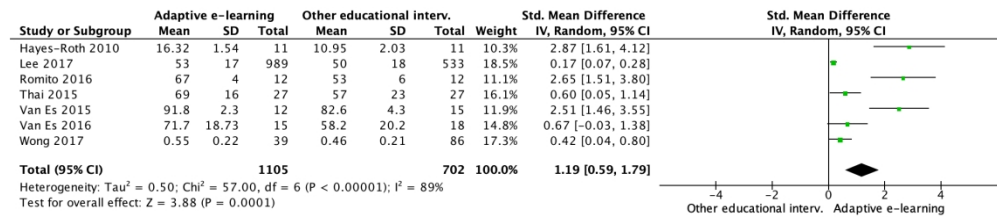

Figure 5. Forest plot representing the meta-analysis of the efficacy of adaptive e-learning versus other educational interventions in improving skills.

365x79mm (144 x 144 DPI)

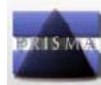

# PRISMA 2009 Checklist

| Section/topic                      | #  | Checklist item                                                                                                                                                                                                                                                                                              | Reported on page #   |
|------------------------------------|----|-------------------------------------------------------------------------------------------------------------------------------------------------------------------------------------------------------------------------------------------------------------------------------------------------------------|----------------------|
| <b>TITLE</b>                       |    |                                                                                                                                                                                                                                                                                                             |                      |
| Title                              | 1  | Identify the report as a systematic review, meta-analysis, or both.                                                                                                                                                                                                                                         | 1                    |
| <b>ABSTRACT</b>                    |    |                                                                                                                                                                                                                                                                                                             |                      |
| Structured summary                 | 2  | Provide a structured summary including, as applicable: background; objectives; data sources; study eligibility criteria, participants, and interventions; study appraisal and synthesis methods; results; limitations; conclusions and implications of key findings; systematic review registration number. | 4-5                  |
| <b>INTRODUCTION</b>                |    |                                                                                                                                                                                                                                                                                                             |                      |
| Rationale                          | 3  | Describe the rationale for the review in the context of what is already known.                                                                                                                                                                                                                              | 7-9                  |
| Objectives                         | 4  | Provide an explicit statement of questions being addressed with reference to participants, interventions, comparisons, outcomes, and study design (PICOS).                                                                                                                                                  | 9-10                 |
| <b>METHODS</b>                     |    |                                                                                                                                                                                                                                                                                                             |                      |
| Protocol and registration          | 5  | Indicate if a review protocol exists, if and where it can be accessed (e.g., Web address), and, if available, provide registration information including registration number.                                                                                                                               | 10                   |
| Eligibility criteria               | 6  | Specify study characteristics (e.g., PICOS, length of follow-up) and report characteristics (e.g., years considered, language, publication status) used as criteria for eligibility, giving rationale.                                                                                                      | 10-11                |
| Information sources                | 7  | Describe all information sources (e.g., databases with dates of coverage, contact with study authors to identify additional studies) in the search and date last searched.                                                                                                                                  | 11-12                |
| Search                             | 8  | Present full electronic search strategy for at least one database, including any limits used, such that it could be repeated.                                                                                                                                                                               | Supplementary File 2 |
| Study selection                    | 9  | State the process for selecting studies (i.e., screening, eligibility, included in systematic review, and, if applicable, included in the meta-analysis).                                                                                                                                                   | 11-12                |
| Data collection process            | 10 | Describe method of data extraction from reports (e.g., piloted forms, independently, in duplicate) and any processes for obtaining and confirming data from investigators.                                                                                                                                  | 11-12                |
| Data items                         | 11 | List and define all variables for which data were sought (e.g., PICOS, funding sources) and any assumptions and simplifications made.                                                                                                                                                                       | 12-13                |
| Risk of bias in individual studies | 12 | Describe methods used for assessing risk of bias of individual studies (including specification of whether this was done at the study or outcome level), and how this information is to be used in any data synthesis.                                                                                      | 13                   |
| Summary measures                   | 13 | State the principal summary measures (e.g., risk ratio, difference in means).                                                                                                                                                                                                                               | 13-14                |
| Synthesis of results               | 14 | Describe the methods of handling data and combining results of studies, if done, including measures of consistency (e.g., $I^2$ ) for each meta-analysis.                                                                                                                                                   | 13-14                |

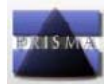

# PRISMA 2009 Checklist

| Section/topic                 | #  | Checklist item                                                                                                                                                                                           | Reported on page # |
|-------------------------------|----|----------------------------------------------------------------------------------------------------------------------------------------------------------------------------------------------------------|--------------------|
| Risk of bias across studies   | 15 | Specify any assessment of risk of bias that may affect the cumulative evidence (e.g., publication bias, selective reporting within studies).                                                             | 13                 |
| Additional analyses           | 16 | Describe methods of additional analyses (e.g., sensitivity or subgroup analyses, meta-regression), if done, indicating which were pre-specified.                                                         | 14                 |
| <b>RESULTS</b>                |    |                                                                                                                                                                                                          |                    |
| Study selection               | 17 | Give numbers of studies screened, assessed for eligibility, and included in the review, with reasons for exclusions at each stage, ideally with a flow diagram.                                          | 15                 |
| Study characteristics         | 18 | For each study, present characteristics for which data were extracted (e.g., study size, PICOS, follow-up period) and provide the citations.                                                             | 18                 |
| Risk of bias within studies   | 19 | Present data on risk of bias of each study and, if available, any outcome level assessment (see item 12).                                                                                                | 29-30              |
| Results of individual studies | 20 | For all outcomes considered (benefits or harms), present, for each study: (a) simple summary data for each intervention group (b) effect estimates and confidence intervals, ideally with a forest plot. | 32-33              |
| Synthesis of results          | 21 | Present results of each meta-analysis done, including confidence intervals and measures of consistency.                                                                                                  | 32-33              |
| Risk of bias across studies   | 22 | Present results of any assessment of risk of bias across studies (see Item 15).                                                                                                                          | 31                 |
| Additional analysis           | 23 | Give results of additional analyses, if done (e.g., sensitivity or subgroup analyses, meta-regression [see Item 16]).                                                                                    | N/A                |
| <b>DISCUSSION</b>             |    |                                                                                                                                                                                                          |                    |
| Summary of evidence           | 24 | Summarize the main findings including the strength of evidence for each main outcome; consider their relevance to key groups (e.g., healthcare providers, users, and policy makers).                     | 32-33              |
| Limitations                   | 25 | Discuss limitations at study and outcome level (e.g., risk of bias), and at review-level (e.g., incomplete retrieval of identified research, reporting bias).                                            | 39                 |
| Conclusions                   | 26 | Provide a general interpretation of the results in the context of other evidence, and implications for future research.                                                                                  | 36-39              |
| <b>FUNDING</b>                |    |                                                                                                                                                                                                          |                    |
| Funding                       | 27 | Describe sources of funding for the systematic review and other support (e.g., supply of data); role of funders for the systematic review.                                                               | 41                 |

From: Moher D, Liberati A, Tetzlaff J, Altman DG, The PRISMA Group (2009). Preferred Reporting Items for Systematic Reviews and Meta-Analyses: The PRISMA Statement. PLoS Med 6(7): e1000097. doi:10.1371/journal.pmed1000097

For more information, visit: [www.prisma-statement.org](http://www.prisma-statement.org).

## Supplementary File 2 – Search Strategy for PubMed

**PubMed – 17 avril 2017**

1. ((Adaptive[TIAB] OR individualized [TIAB] OR personalized[TIAB] OR Tailored[TIAB]) AND (elearning[TIAB] OR learning[TIAB] OR Instruction[TIAB] OR "web-based instruction"[TIAB] OR computer-based instruction[TIAB] OR computer-based tutoring[TIAB] OR education[TIAB] OR tutorial[TIAB] OR tutorials[TIAB])) OR Intelligent tutoring system[TIAB] OR Intelligent tutoring systems[TIAB]
2. "Computer-Assisted Instruction"[MH]
3. #1 OR #2
4. Health Personnel\*[TIAB] OR Health professional\*[TIAB] OR Health care profession\*[TIAB] OR Healthcare profession\*[TIAB] OR Medical student\*[TIAB] OR Medical assistant\*[TIAB] OR health worker\*[TIAB] OR Audiologist\*[TIAB] OR Chiropractor\*[TIAB] OR Dentist[TIAB] OR Dentists[TIAB] OR Dietitian\*[TIAB] OR Dermatolog\*[TIAB] OR endocrinologist\*[TIAB] OR Gastroenterolog\*[TIAB]OR Gynecolog\*[TIAB]OR Radiolog\*[TIAB] OR Medical Staff[TIAB] OR Midwife\*[TIAB] OR nutritionist\*[TIAB] OR Nurse[TIAB] OR Nurses[TIAB] OR Optometrist\*[TIAB] OR Occupational Therapist\*[TIAB] OR Patholog\*[TIAB] OR Paramedic[TIAB] OR Paediatric[TIAB] OR pediatrician\*[TIAB] OR Paediatrician\*[TIAB] OR pediatricist\*[TIAB] OR pediatric[TIAB] OR Pharmacist\*[TIAB] OR Pharmaconomist\*[TIAB] OR Pharmacologist\*[TIAB] OR Pharmacy technician\*[TIAB] OR Phlebotomist\*[TIAB] OR Physician OR Podiatrist\*[TIAB] OR Psychologist\*[TIAB] OR Psychotherapist\*[TIAB] OR psychiatrist\*[TIAB] OR Physical therapist\*[TIAB] OR physiotherapist\*[TIAB] OR Respiratory therapist\*[TIAB] OR Surgeon\*[TIAB] OR Clinician\*[TIAB] OR Cardiologist\*[TIAB] OR Emergency medical technician\*[TIAB] OR emergency doctor\*[TIAB] OR emergentologist\*[TIAB] OR clinical officer\*[TIAB] OR Community health worker\*[TIAB] OR Radiographer\*[TIAB] OR Surgical technologist\*[TIAB] OR Radiotherapist\*[TIAB] OR Anesthetist\*[TIAB] OR Resident[TIAB] OR residents[TIAB]
5. "Health Personnel"[MH] OR "Students, Premedical"[MH] OR "Students, Medical"[MH] OR "Students, Nursing"[Mesh]
6. "Education, Premedical"[MH] OR "Education, Medical"[MH] OR "Education, Nursing"[MH] OR "Education, Pharmacy"[MH] OR "Education, Public Health Professional"[MH] OR "Clinical Clerkship"[MH]
7. #4 OR #5 OR 6
8. knowledge\*[TIAB] OR Aptitude\*[TIAB] OR accuracy[TIAB] OR impact\*[TIAB] OR skill\*[TIAB] OR performance\*[TIAB] OR Learning outcome\*[TIAB] OR effectiveness[TIAB] OR efficacy[TIAB] OR improvement\*[TIAB] OR Innovative\*[TIAB] OR innovation\*[TIAB] OR randomised controlled trial[TIAB] OR randomized controlled trial[TIAB]
9. "Clinical Competence"[MH] "Quality Improvement"[MH] OR "Learning Curve"[MH] OR Knowledge [MH] OR "randomized controlled trial"[PT]
10. #8 OR 9
11. #3 AND #7 AND #10
12. (english[LA] OR french[LA]) AND 2005:2017[DP]
13. #11 AND #12

**Résultats: 4 375**

Supplementary File 3 – Summary of the quality of evidence

| Certainty assessment |                   |                      |                      |              |                      |                      | No of patients                                   |                                 | Effect            |                                                    | Certainty        | Importance |
|----------------------|-------------------|----------------------|----------------------|--------------|----------------------|----------------------|--------------------------------------------------|---------------------------------|-------------------|----------------------------------------------------|------------------|------------|
| No of studies        | Study design      | Risk of bias         | Inconsistency        | Indirectness | Imprecision          | Other considerations | adaptive and intelligent e-learning environments | other educational interventions | Relative (95% CI) | Absolute (95% CI)                                  |                  |            |
| <b>Knowledge</b>     |                   |                      |                      |              |                      |                      |                                                  |                                 |                   |                                                    |                  |            |
| 6                    | randomised trials | serious <sup>a</sup> | serious <sup>b</sup> | not serious  | serious <sup>c</sup> | none                 | 552                                              | 583                             | -                 | SMD 0.7 SD higher<br>(0.08 lower to 1.49 higher)   | ⊕○○○<br>VERY LOW | IMPORTANT  |
| <b>Competence</b>    |                   |                      |                      |              |                      |                      |                                                  |                                 |                   |                                                    |                  |            |
| 7                    | randomised trials | serious <sup>a</sup> | not serious          | not serious  | serious <sup>c</sup> | none                 | 1105                                             | 702                             | -                 | SMD 1.19 SD higher<br>(0.59 higher to 1.79 higher) | ⊕⊕○○<br>LOW      | CRITICAL   |

CI: Confidence interval; SMD: Standardised mean difference

Explanations

- a. Most studies have unclear or high risk of bias with regard to random sequence generation and allocation concealment. The risk of bias for similarity of baseline measurements was unclear for some studies. Thus, groups in these studies could be disproportionate and the distribution may not be normal since sample size is generally small.
- b. Studies yield widely differing estimates of effect (heterogeneity or variability in results). The individual confidence intervals of some studies almost do not touch.
- c. Most studies include few participants and few events and have wide confidence intervals. Measurement instruments often not validated. Sample size often insufficient.



# BMJ Open

## Efficacy of adaptive e-learning for health professionals and students: a systematic review and meta-analysis

|                                 |                                                                                                                                                                                                                                                                                                                                                                                                                                                                                                                                                                                                                                                                                                                                                                                                                                                                                                                                                                                                           |
|---------------------------------|-----------------------------------------------------------------------------------------------------------------------------------------------------------------------------------------------------------------------------------------------------------------------------------------------------------------------------------------------------------------------------------------------------------------------------------------------------------------------------------------------------------------------------------------------------------------------------------------------------------------------------------------------------------------------------------------------------------------------------------------------------------------------------------------------------------------------------------------------------------------------------------------------------------------------------------------------------------------------------------------------------------|
| Journal:                        | <i>BMJ Open</i>                                                                                                                                                                                                                                                                                                                                                                                                                                                                                                                                                                                                                                                                                                                                                                                                                                                                                                                                                                                           |
| Manuscript ID                   | bmjopen-2018-025252.R2                                                                                                                                                                                                                                                                                                                                                                                                                                                                                                                                                                                                                                                                                                                                                                                                                                                                                                                                                                                    |
| Article Type:                   | Research                                                                                                                                                                                                                                                                                                                                                                                                                                                                                                                                                                                                                                                                                                                                                                                                                                                                                                                                                                                                  |
| Date Submitted by the Author:   | 10-Jun-2019                                                                                                                                                                                                                                                                                                                                                                                                                                                                                                                                                                                                                                                                                                                                                                                                                                                                                                                                                                                               |
| Complete List of Authors:       | Fontaine, Guillaume; University of Montreal, Faculty of Nursing; Montreal Heart Institute, Research Center<br>Cossette, Sylvie ; University of Montreal, Faculty of Nursing; Montreal Heart Institute, Research Center<br>Maheu-Cadotte, Marc-André; University of Montreal, Faculty of Nursing; Montreal Heart Institute, Research Center<br>Mailhot, Tanya; Northeastern University, Bouve College of Health Sciences; Montreal Heart Institute, Research Center<br>Deschênes, Marie-France; University of Montreal, Faculty of Nursing<br>Mathieu-Dupuis, Gabrielle; University of Montreal, School of Librarianship and Information Science<br>Côté, José; University of Montreal, Faculty of Nursing; University of Montreal Hospital Centre, Research Center<br>Gagnon, Marie-Pierre; Laval University, Faculty of Nursing; CHU de Québec-Université Laval, Research Center<br>Dubé, Veronique; University of Montreal, Faculty of Nursing; University of Montreal Hospital Centre, Research Center |
| <b>Primary Subject Heading</b>: | Medical education and training                                                                                                                                                                                                                                                                                                                                                                                                                                                                                                                                                                                                                                                                                                                                                                                                                                                                                                                                                                            |
| Secondary Subject Heading:      | Health services research                                                                                                                                                                                                                                                                                                                                                                                                                                                                                                                                                                                                                                                                                                                                                                                                                                                                                                                                                                                  |
| Keywords:                       | MEDICAL EDUCATION & TRAINING, COMPUTER-ASSISTED INSTRUCTION, ADAPTIVE E-LEARNING ENVIRONMENTS, META-ANALYSIS, SYSTEMATIC REVIEW                                                                                                                                                                                                                                                                                                                                                                                                                                                                                                                                                                                                                                                                                                                                                                                                                                                                           |
|                                 |                                                                                                                                                                                                                                                                                                                                                                                                                                                                                                                                                                                                                                                                                                                                                                                                                                                                                                                                                                                                           |

SCHOLARONE™  
Manuscripts

# 1 **Efficacy of adaptive e-learning for health professionals and** 2 **students: a systematic review and meta-analysis**

3  
4 **Guillaume Fontaine** <sup>a, b\*</sup>, **Sylvie Cossette** <sup>a, b</sup>, **Marc-André Maheu-Cadotte** <sup>a, b, c</sup>,  
5 **Tanya Mailhot** <sup>a, b, d</sup>, **Marie-France Deschênes** <sup>a, e</sup>, **Gabrielle Mathieu-Dupuis** <sup>f</sup>, **José Côté** <sup>a, c</sup>,  
6 **Marie-Pierre Gagnon** <sup>g, h</sup>, **Véronique Dubé** <sup>a, c</sup>

7  
8 <sup>a</sup> Faculty of Nursing, Université de Montréal, Montréal, Québec, Canada

9 <sup>b</sup> Montreal Heart Institute Research Center, Montréal, Québec, Canada

10 <sup>c</sup> Centre Hospitalier de l'Université de Montréal Research Center, Montréal, Québec, Canada

11 <sup>d</sup> Faculty of Medicine, Université de Montréal, Montréal, Québec, Canada

12 <sup>e</sup> Center for Innovation in Nursing Education, Montréal, Québec, Canada

13 <sup>f</sup> School of Librarianship and Information Science, Université de Montréal, Montreal, Québec,  
14 Canada

15 <sup>g</sup> Faculty of Nursing, Université Laval, Québec, Québec, Canada

16 <sup>h</sup> CHU de Québec Research Center, Québec, Québec, Canada

17  
18 \* Corresponding author: Montreal Heart Institute Research Center, 5000 Belanger Street, H1T  
19 1C8, Room S-2490, Montreal, QC, Canada. Tel: 1-514-376-3330, x3069. E-mail:  
20 [guillaume.fontaine@umontreal.ca](mailto:guillaume.fontaine@umontreal.ca)

21  
22 Word count (excluding title page, abstract, references, figures, and tables): 5,823 words

1  
2  
3 23  
45 24 **COPYRIGHT**  
6  
7

8 25 The Corresponding Author has the right to grant on behalf of all authors and does grant on  
9  
10 26 behalf of all authors, a worldwide license to the Publishers and its licensees in perpetuity, in all  
11  
12 27 forms, formats and media (whether known now or created in the future), to i) publish, reproduce,  
13  
14 28 distribute, display and store the Contribution, ii) translate the Contribution into other languages,  
15  
16 29 create adaptations, reprints, include within collections and create summaries, extracts and/or,  
17  
18 30 abstracts of the Contribution, iii) create any other derivative work(s) based on the Contribution,  
19  
20 31 iv) to exploit all subsidiary rights in the Contribution, v) the inclusion of electronic links from the  
21  
22 32 Contribution to third party material where-ever it may be located; and, vi) license any third party  
23  
24 33 to do any or all of the above.  
25  
26  
27  
28  
29

30 34 **DECLARATION OF COMPETING INTERESTS**  
31  
32

33 35 All authors have completed the ICMJE uniform disclosure form at  
34  
35 36 [www.icmje.org/coi\\_disclosure.pdf](http://www.icmje.org/coi_disclosure.pdf) and declare: no support from any organisation for the  
36  
37 37 submitted work; no financial relationships with any organisation that might have an interest in the  
38  
39 38 submitted work in the previous three years; no other relationships or activities that could appear  
40  
41 39 to have influenced the submitted work  
42  
43  
44

45 40 **TRANSPARENCY DECLARATION**  
46  
47  
48

49 41 The lead author (the manuscript's guarantor) affirms that the manuscript is an honest,  
50  
51 42 accurate, and transparent account of the study being reported; that no important aspects of the  
52  
53 43 study have been omitted; and that any discrepancies from the study as planned (and, if relevant,  
54  
55 44 registered) have been explained.  
56  
57  
58  
59  
60

1  
2  
3  
4  
5  
6  
7  
8  
9  
10  
11  
12  
13  
14  
15  
16  
17  
18  
19  
20  
21  
22  
23  
24  
25  
26  
27  
28  
29  
30  
31  
32  
33  
34  
35  
36  
37  
38  
39  
40  
41  
42  
43  
44  
45  
46  
47  
48  
49  
50  
51  
52  
53  
54  
55  
56  
57  
58  
59  
60

45 **FUNDING STATEMENT**

46 This study received no funding.

47

For peer review only

## 48 ABSTRACT (300 WORDS)

49 **Objective:** Although adaptive e-learning environments (AEEs) can provide personalized  
50 instruction to health professional and students, their efficacy remains unclear. Therefore, this  
51 review aimed to identify, appraise, and synthesize the evidence regarding the efficacy of AEEs in  
52 improving knowledge, skills, and clinical behavior in health professionals and students.

53 **Design:** Systematic review and meta-analysis.

54 **Data Sources:** CINAHL, EMBASE, ERIC, PsycINFO, PubMed and Web of Science from the  
55 first year of records to February 2019.

56 **Eligibility Criteria:** Controlled studies that evaluated the effect of an AEE on knowledge, skills  
57 or clinical behavior in health professionals or students.

58 **Screening, Data Extraction and Synthesis:** Two authors screened studies, extracted data,  
59 assessed risk of bias, and coded quality of evidence independently. AEEs were reviewed with  
60 regard to their topic, theoretical framework, and adaptivity process. Studies were included in the  
61 meta-analysis if they had a non-AEE control group and had no missing data. Effect sizes (ES)  
62 were pooled using a random effects model.

63 **Results:** From a pool of 10,569 articles, we included 21 eligible studies enrolling 3,684 health  
64 professionals and students. Clinical topics were mostly related to diagnostic testing, theoretical  
65 frameworks were varied, and the adaptivity process was characterized by 5 subdomains: method,  
66 goals, timing, factors, and types. The pooled ES was 0.70 for knowledge (95% CI, -0.08-1.49;  $P$   
67 .08), and 1.19 for skills (95% CI, 0.59-1.79;  $P < .00001$ ). Risk of bias was generally high.  
68 Heterogeneity was large in all analyses.

1  
2  
3 69 **Conclusions:** AEEs appear particularly effective in improving skills in health professionals and  
4  
5 70 students. The adaptivity process within AEEs may be more beneficial for learning skills rather  
6  
7 71 than factual knowledge, which generates less cognitive load. Future research should report more  
8  
9 72 clearly on the design and adaptivity process of AEEs, and target higher-level outcomes, such as  
10  
11 73 clinical behavior.  
12  
13  
14

15 74 **PROSPERO registration number:** CRD42017065585  
16  
17

18 75 **Keywords:** Computer-assisted instruction; medical education; nursing education; e-learning,  
19  
20 76 meta-analysis  
21  
22  
23  
24  
25  
26  
27  
28  
29  
30  
31  
32  
33  
34  
35  
36  
37  
38  
39  
40  
41  
42  
43  
44  
45  
46  
47  
48  
49  
50  
51  
52  
53  
54  
55  
56  
57  
58  
59  
60

## 77 **ARTICLE SUMMARY**

### 78 **Strengths and Limitations of the Study**

- 79       • This is the first systematic review and meta-analysis examining the efficacy of adaptive e-  
80       learning environments in improving knowledge, skills, and clinical behavior in health  
81       professionals and students.
- 82       • Strengths of this review include the broad search strategy, and in-depth assessments of the  
83       risk of bias and the quality of evidence.
- 84       • High statistical heterogeneity resulting from clinical and methodological diversity limits  
85       the interpretation of findings.
- 86       • Quantitative results should be treated with caution, given the small number and risk of  
87       bias of studies included in the meta-analysis.

## 88 INTRODUCTION

89 The use of information and communication technologies (ICTs) in the education of health  
90 professionals and students has become ubiquitous. Indeed, e-learning, defined as the use of ITCs  
91 to access educational curriculum and support learning<sup>1</sup>, is increasingly present in clinical settings  
92 for the continuing education of health professionals<sup>2,3</sup>, and in academic settings for the education  
93 of health professions students<sup>4</sup>. E-learning environments integrate information, in the form of text  
94 and multimedia (e.g., illustrations, animations, videos). They can include both asynchronous (i.e.,  
95 designed for self-study) and synchronous (i.e., a class taught by an educator in real time)  
96 components<sup>1</sup>. *Nonadaptive* e-learning environments, the most widespread type of e-learning  
97 environment today, provide a standardized training for all learners<sup>5,6</sup>. While they can include  
98 instructional design variations (e.g., interactivity, feedback, practice exercises), they *do not*  
99 consider learners' characteristics and the data generated during the learning process to provide a  
100 personalized training<sup>6-8</sup>. This is problematic, since the interaction of health professionals and  
101 students with e-learning environments during the learning process generates a significant amount  
102 of data<sup>9</sup>. However, designers of e-learning environments and educators rarely make use of this  
103 data to optimize learning efficacy and efficiency<sup>9</sup>.

104 In recent years, educational researchers have strived to develop e-learning environments that take  
105 a data-driven and personalized approach to education<sup>10-13</sup>. E-learning environments that take into  
106 account each learner's interactions and performance level could anticipate what types of content  
107 and resources meet the learner's needs, potentially increasing learning efficacy and efficiency<sup>13</sup>.  
108 Adaptive e-learning environments (AEEs) were developed for this purpose. AEEs collect data to  
109 build each learner's profile (e.g., navigation behavior, preferences, knowledge), and use simple  
110 techniques (e.g., adaptive information filtering, adaptive hypermedia) to implement different



1  
2  
3 111 types of adaptivity targeting the content, navigation, presentation, multimedia, or strategies of the  
4  
5 112 training to provide a personalized learning experience<sup>11 12</sup>. In the fields of computer science and  
6  
7 113 educational technology, the term *adaptivity* refers to the process executed by a system based on  
8  
9 114 ICTs of adapting educational curriculum content, structure or delivery to the profile of a  
10  
11 115 learner<sup>14</sup>. Two main methods of adaptivity can be implemented within an AEE. The first method,  
12  
13 116 *designed adaptivity*, is expert-based and refers to an educator who designs the optimal  
14  
15 117 instructional sequence to guide learners to learning content mastery. The educator determines  
16  
17 118 how the curriculum will adapt to learners based on a variety of factors, such as knowledge or  
18  
19 119 response time to a question. This method of adaptivity is thus based on the expertise of the  
20  
21 120 educator who specifies how technology will react in a particular situation on the basis of the “if  
22  
23 121 THIS, then THAT” approach. The second method, *algorithmic adaptivity*, refers to use of  
24  
25 122 algorithms to determine, for instance, the extent of the learner’s knowledge and the optimal  
26  
27 123 instructional sequence. Algorithmic adaptivity requires more advanced adaptivity techniques and  
28  
29 124 learner-modelling techniques derived from the fields of computer science and artificial  
30  
31 125 intelligence (e.g. Bayesian knowledge tracing, rule-based machine learning, natural language  
32  
33 126 processing)<sup>10 15-18</sup>.

34  
35  
36  
37  
38  
39  
40 127 The variability in the degree and the complexity of adaptivity within AEEs mirrors the adaptivity  
41  
42 128 that can be observed in non-e-learning educational interventions. Some interventions, like one-  
43  
44 129 on-one human instruction and small-group classroom instruction, generally have a high degree of  
45  
46 130 adaptivity since the instructor can adapt his teaching to the individual profiles of learners and  
47  
48 131 consider their feedback<sup>19</sup>. Other interventions, like large-group classroom instruction, generally  
49  
50 132 have a low degree of adaptivity to individual learners. In some interventions, like paper-based  
51  
52 133 instruction (e.g., handouts, textbooks), there is no adaptivity at all.  
53  
54  
55  
56  
57  
58  
59  
60

1  
2  
3 134 AEEs have been developed and evaluated primarily in academic settings for students in  
4  
5 135 mathematics, physics and related disciplines, for the acquisition of knowledge and development  
6  
7 136 of cognitive skills (e.g., arithmetic calculation). Four meta-analyses reported on the efficacy of  
8  
9  
10 137 AEEs among high school and university students in in these fields of study<sup>15-17 20</sup>. The results are  
11  
12 138 promising: AEEs are in almost all cases more effective than large-group classroom instruction. In  
13  
14 139 addition, Nesbit, et al.<sup>21</sup> point out that AEEs are more effective than nonadaptive e-learning  
15  
16 140 environments. However, despite evidence of the efficacy of AEEs for knowledge acquisition and  
17  
18 141 skill development in areas such as mathematics in high school and university students, their  
19  
20 142 efficacy in improving learning outcomes in health professionals and students has not yet been  
21  
22 143 established. To address this need, we conducted a systematic review and meta-analysis to identify  
23  
24 144 and quantitatively synthesize all comparative studies of AEEs involving health professionals and  
25  
26 145 students.

### 146 **Systematic Review and Meta-Analysis Objective**

147 To systematically identify, appraise, and synthesize the best available evidence regarding the  
148 efficacy of AEEs in improving knowledge, skills, and clinical behavior in health professionals  
149 and students.

### 150 **Systematic Review and Meta-Analysis Questions**

151 We sought to answer the following questions with the systematic review:

- 152 1. What are the characteristics of studies assessing an AEE designed for health  
153 professionals' and students' education?
- 154 2. What are the characteristics of AEEs designed for health professionals' or students'  
155 education?

1  
2  
3 156 We sought to answer the following question with the meta-analysis:  
4  
5

6 157 3. What is the efficacy of AEEs in improving knowledge, skills, and clinical behavior in  
7  
8 158 health professionals and students in comparison with nonadaptive e-learning  
9  
10 159 environments, and non-e-learning educational interventions?  
11  
12  
13

## 14 160 **METHODS**

15  
16  
17 161 We planned and conducted this systematic review following the Effective Practice and  
18  
19 162 Organization of Care (EPOC) Cochrane Group guidelines<sup>22</sup>, and reported it according to the  
20  
21 163 Preferred Reporting Items for Systematic review and Meta-Analysis (PRISMA) standards<sup>23</sup> (see  
22  
23 164 **Supplementary File 1**). We prospectively registered (International Prospective Register of  
24  
25 165 Systematic Reviews #CRD42017065585) and published the protocol of this systematic review<sup>24</sup>.  
26  
27 166 Thus, in this paper, we present an abridged version of the methods with an emphasis on changes  
28  
29 167 made to the methods since the publication of the protocol.  
30  
31  
32  
33

### 34 168 **Study Eligibility**

35  
36  
37 169 We included primary research articles that assessed an AEE with licensed health professionals,  
38  
39 170 students, trainees, and residents in any discipline. We defined an AEE as a computer-based  
40  
41 171 learning environment which collects data to build each learner's profile (e.g., navigation  
42  
43 172 behavior, individual objectives, knowledge), interprets these data through algorithms, and adapts  
44  
45 173 in real-time the content (e.g., showing/hiding information), navigation (e.g., specific links and  
46  
47 174 paths), presentation (e.g., page layout), multimedia presentation (e.g., images, videos), or tools  
48  
49 175 (e.g., different set of strategies for different types of learners) to provide a dynamic and  
50  
51 176 evolutionary learning path for each learner<sup>10 14</sup>. We used the definitions of each type of adaptivity  
52  
53  
54 177 proposed by Knutov and colleagues<sup>12</sup>. We considered for inclusion studies in which AEEs had  
55  
56  
57  
58  
59  
60

1  
2  
3 178 designed or algorithmic adaptivity, and studies including a co-intervention in addition to adaptive  
4  
5 179 e-learning (e.g. paper-based instruction). We considered for inclusion primary research articles  
6  
7 180 in which the comparator was: 1) a nonadaptive e-learning environment; 2) a non-e-learning  
8  
9 181 educational intervention; 3) another AEE with design variations. While included in the qualitative  
10  
11 182 synthesis of the evidence for descriptive purposes, the third comparator was excluded from the  
12  
13 183 meta-analysis. Outcomes of interest were knowledge, skills, and behavior<sup>25 26</sup>, and were defined  
14  
15 184 as follows: 1) knowledge: subjective (e.g., learner self-report) or objective (e.g., multiple-choice  
16  
17 185 question knowledge test) assessments of factual or conceptual understanding; 2) skills: subjective  
18  
19 186 (eg, learner self-report) or objective (eg, faculty ratings) assessments of procedural skills (e.g.  
20  
21 187 taking a blood sample, performing CPR) or cognitive skills (e.g. problem-solving, interpreting  
22  
23 188 radiographs) in learners; 3) behavior: subjective (eg, learner self-report) or objective (eg, chart  
24  
25 189 audit) assessments of behaviors in clinical practice (such as test ordering)<sup>6</sup>. In terms of study  
26  
27 190 design, we considered for inclusion all controlled, quantitative studies in accordance with the  
28  
29 191 EPOC Cochrane Review Group guidelines<sup>27</sup>.

30  
31  
32  
33  
34  
35  
36 192 We excluded studies that: 1) were not published in English or French; 2) were non-experimental;  
37  
38 193 3) were not controlled; 4) did not report on at least one of the outcomes of interest in this review;  
39  
40 194 5) did not have a topic related to the clinical aspects of health.

## 41 42 43 195 **Study Identification**

44  
45  
46  
47 196 We previously published our search strategy<sup>24</sup>. Briefly, we designed a strategy in consultation  
48  
49 197 with a librarian to search CINAHL, EMBASE, ERIC, PsycINFO, PubMed and Web of Science  
50  
51 198 for primary research articles published since the inception of each database up to February 2019.  
52  
53 199 The search strategy revolved around 3 key concepts: “adaptive e-learning environments”, “health

1  
2  
3 200 professionals/students”, and “effects on knowledge/competence (skills)/behavior” (see  
4  
5 201 **Supplementary file 2**). To identify additional articles, we hand-searched 6 key journals (e.g.,  
6  
7 202 *British Journal of Educational Technology, Computers and Education*) and the reference lists of  
8  
9 203 included primary research articles.  
10  
11  
12

## 13 204 **Study Selection**

14  
15  
16 205 We worked independently and in duplicate (G.F. and M.-A.M.-C./T.M.) to screen all titles and  
17  
18 206 abstracts for inclusion using the EndNote software V8.0 (Clarivate Analytics). We resolved  
19  
20 207 disagreements by consensus. We then performed the full-text assessment of potentially eligible  
21  
22 208 articles using the same methodology. Studies were included in the meta-analysis if they had a  
23  
24 209 non-AEE control group and had no missing data.  
25  
26  
27

## 28 210 **Data Extraction**

29  
30  
31 211 One review author (G.F.) extracted data from included primary research articles using a modified  
32  
33 212 version of the data collection form developed by the EPOC Cochrane Review Group<sup>28</sup>. The main  
34  
35 213 changes made to the extraction form were the addition of specific items relating to the AEE  
36  
37 214 assessed in each study. Two review authors (T.M., M.-F.D.) validated the data extraction forms  
38  
39 215 by reviewed the contents of each form against the data in the original article, adding comments  
40  
41 216 when changes were needed. For all studies, we extracted the following data items if possible:  
42  
43  
44  
45

- 46 217 • *the population and setting*: study setting, study population, inclusion criteria, exclusion  
47  
48 218 criteria;
- 49  
50 219 • *the methods*: study aim, study design, unit of allocation, study start date and end date, and  
51  
52 220 duration of participation;  
53  
54  
55  
56  
57  
58  
59  
60

- 1  
2  
3 221 • *the participants*: study sample, withdrawals and exclusions, age, sex, level of instruction,  
4  
5 222 number of years of experience as a health professional, practice setting, and previous  
6  
7 223 experience using e-learning;  
8  
9  
10 224 • *the interventions*: name of intervention, theoretical framework, statistical model/algorithm  
11  
12 225 used to generate the learning path, clinical topic, number of training sessions, duration of  
13  
14 226 each training session, total duration of the training, adaptivity subdomains (method, goals,  
15  
16 227 timing, factors, types), mode of delivery, presence of other educational interventions and  
17  
18 228 strategies;  
19  
20 229 • *the outcomes*: name, time-points measured, definition, person measuring, unit of  
21  
22 230 measurement, scales, validation of measurement tool;  
23  
24 231 • *the results*: results according to our primary (knowledge) and secondary (skills, behavior)  
25  
26 232 outcomes, comparison, time-point, baseline data, statistical methods used, and key  
27  
28 233 conclusions.  
29  
30  
31  
32  
33

34 234 We contacted the corresponding authors of included primary research articles to provide us with  
35  
36 235 missing data.  
37  
38

### 39 236 **Assessment of the Risk of Bias**

40  
41  
42 237 We worked independently and in duplicate (G.F. and T.M./M.-F.D.) to assess the risk of bias of  
43  
44 238 included primary research articles using the EPOC risk of bias criteria, based upon the data  
45  
46 239 extracted with the data collection form<sup>28</sup>. A study was deemed at high risk of bias if the  
47  
48 240 individual criterion “random sequence generation” was scored at “high” or at “unclear” risk of  
49  
50 241 bias.  
51  
52  
53  
54  
55  
56  
57  
58  
59  
60

## 242 Data Synthesis

243 First, we synthesized data qualitatively using tables to provide an overview of the included  
244 studies, and of the AEEs reported in these studies.

245 Second, using the Review Manager (RevMan) software V5.1, we first conducted a meta-analysis  
246 to quantitatively synthesize the efficacy of AEEs versus other educational interventions in  
247 improving all learning outcomes. We included studies in the meta-analysis if the comparator  
248 wasn't another AEE, if they were randomized, and if they reported outcome data. We then  
249 conducted meta-analyses with the same comparison for each outcome for which data from at  
250 least 2 studies were available (i.e., knowledge, skills). For randomized controlled trials (RCTs),  
251 we converted each post-test mean and standard deviation (SD) to a standardized mean difference  
252 ([SMD], also known as Hedges g effect size [ES]). For crossover RCTs, we used means pooled  
253 across each intervention. We pooled ESs using a random effects model. Statistical significance  
254 was defined by a two-sided alpha of .05.

255 We first assessed heterogeneity qualitatively by examining the characteristics of included studies,  
256 the similarities and disparities between the types of participants, the types of interventions, and  
257 the types of outcomes. We then used the  $I^2$  statistic within the RevMan software to quantify how  
258 much the results varied across individual studies (i.e., between-study inconsistency, or  
259 heterogeneity). We interpreted the  $I^2$  values as follows: 0%-40%: might not be important; 30%-  
260 60%: may represent moderate heterogeneity; 50%-90%: may represent substantial heterogeneity;  
261 and 75%-100%: considerable heterogeneity<sup>29</sup>. We performed sensitivity analysis to assess if the  
262 exclusion of studies at high risk of bias or with a small sample size ( $n < 20$ ) would have had an

263 impact on statistical heterogeneity. Subgroup analyses were performed to examine if study  
264 population and study comparators were potential effect modifiers.

265 Since less than 10 studies were included in the meta-analysis for each outcome, we did not assess  
266 reporting biases using a funnel plot, as suggested in the Cochrane Handbook<sup>30</sup>.

## 267 **Assessment of the Quality of Evidence**

268 We worked independently and in duplicate (G.F. and M.-A.M.-C.) to assess the quality of  
269 evidence for each individual outcome. We used the Grading of Recommendations Assessment,  
270 Development, and Evaluation (GRADE) Web-based software, based upon the data extracted with  
271 the data collection checklist<sup>31</sup>. We considered 5 factors (risk of bias of included studies,  
272 indirectness of evidence, unexplained heterogeneity or inconsistency of results, imprecision of  
273 the results, probability of reporting bias) for downgrading the quality of the body of evidence for  
274 each outcome<sup>31</sup>.

## 275 **Patient and Public Involvement**

276 Patients and the public were not involved in setting the research question, the outcome measures,  
277 the design or conduct of this systematic review. Patients and the public were not asked to advise  
278 on interpretation of results or to contribute to the writing or editing of this document.

## 279 **RESULTS**

### 280 **Study Flow**

281 From a pool of 10,569 potentially relevant articles, we found 21 quantitative, controlled studies  
282 assessing an AEE with health professionals or students (see **Figure 1**).



1  
2  
3 283 [Insert Figure 1]  
4  
5

6 284 Out of 21 included studies in the qualitative synthesis, 4 studies compared two AEEs with design  
7  
8 285 variations<sup>32-35</sup>, and 4 studies had missing data<sup>36-39</sup>. The 4 studies with missing data did not report  
9  
10 286 properly data regarding the results, i.e. mean scores and standard deviations in both study groups  
11  
12  
13 287 at post-test, regarding the outcomes of interest in this review (i.e., knowledge, skills or clinical  
14  
15 288 behavior). Thus, 13 studies were included in the meta-analysis and used to calculate an ES on  
16  
17 289 learning outcomes.  
18  
19

## 20 21 290 **Study Characteristics**

22  
23  
24 291 We summarized the key characteristics of included studies in table format (see **Table 1**). In terms  
25  
26 292 of study population, in the 21 studies examined published between 2003 and 2018, investigators  
27  
28 293 have evaluated AEEs mostly in the medical field. Studies focused on medical students (n=8)<sup>38-44</sup>,  
29  
30 294 medical residents (n=8)<sup>32-35 41 45-47</sup>, physicians in practice (n=4)<sup>36 37 41 48</sup>, nursing students (n=2)  
31  
32 295 <sup>40 49</sup>, nurses in practice (n=2)<sup>48 50</sup> and health sciences students (n=1)<sup>51</sup>. Three studies focused on  
33  
34 296 multiple populations<sup>40 41 48</sup>. The median sample size was 46 participants (interquartile range  
35  
36 297 [IQR] 123). In terms of study design, 15 out of 21 studies (71%) were randomized, 7 studies of  
37  
38 298 which were randomized crossover trials<sup>33 34 41-43 45 47</sup>. The median number of training sessions  
39  
40 299 was 2 (IQR 2.5 sessions), the median training time was 2.13 hours (IQR 2.88 hours), and the  
41  
42 300 median training period was 14 days (IQR 45 days). In terms of comparators, it is possible to  
43  
44 301 underline three types of comparisons. The first comparison is an AEE versus another AEE with  
45  
46 302 design variations (n=4)<sup>32-35</sup>, which implies that one of the AEEs assessed had variations in its  
47  
48 303 design, such as different types of adaptivity (e.g., feedback in one AEE is longer or more  
49  
50 304 complex than in the other). The second comparison is an AEE versus a nonadaptive e-learning  
51  
52  
53  
54  
55  
56  
57  
58  
59  
60

1  
2  
3 305 environment (n=11)<sup>38-40 42-46 48 50 51</sup>. The third and final comparison is an AEE versus another  
4  
5 306 type of educational intervention, such as a paper-based educational intervention, including  
6  
7 307 handouts, textbooks or images (n=3)<sup>37 41 47</sup>, or a traditional educational intervention, such as a  
8  
9 308 group lecture (n=2)<sup>49 52</sup>. In one study, the comparator was not clearly reported<sup>36</sup>. As stated  
10  
11 309 before, only the second and third types of comparisons were included in the meta-analysis since  
12  
13 310 our aim was to synthesize quantitatively the efficacy of AEEs versus other types of educational  
14  
15 311 interventions.  
16  
17  
18  
19  
20 312 Finally, regarding the outcomes, knowledge was assessed in 14 out of 21 studies (66.7%)<sup>32 35 36 38</sup>  
21  
22 313<sup>39 41-45 47-50</sup>, skills in 9 studies (42.9%)<sup>33 34 36 37 40 46 50-52</sup>, and clinical behavior in 2 studies (9.5%)  
23  
24 314<sup>44 50</sup>. Outcome measures for knowledge were similar across studies: in 9 out of 14 studies  
25  
26 315 measuring knowledge, investigators employed multiple-choice questionnaires developed by the  
27  
28 316 research team with input from content experts that were tailored to training content to ensure  
29  
30 317 specificity. Knowledge was also assessed using true-false questions in two studies, and the type  
31  
32 318 of questionnaire was not specified in three studies. Outcome measures for skills were also similar  
33  
34 319 across the 9 studies reporting this outcome, since in all studies investigators measured *cognitive*  
35  
36 320 skills rather than *procedural* skills. Indeed, all outcomes measures for skills were related to  
37  
38 321 clinical reasoning. In 6 studies, skills were measured through tests that included a series of  
39  
40 322 diagnostic tests (eg electrocardiograms, x-rays, microscopy images) that learners had to  
41  
42 323 interpret. In 3 studies, skills were measured through questions based on clinical situations in which  
43  
44 324 learners had to specify how they would react in these particular situations. We were not able to  
45  
46 325 describe the similarity between the outcome measures for clinical behaviour no details were  
47  
48 326 provided in one of the two studies reporting this outcome.  
49  
50  
51  
52  
53  
54  
55  
56  
57  
58  
59  
60

Table 1. Characteristics of Included Studies.

| First Author, Year, Country                                                      | Participants*   | Study Design†                                   | No. and Duration of Training Sessions | Duration of Intervention | Comparison(s)‡  | Type of Outcome(s) of Interest§ | Outcome Measures                                                                                |
|----------------------------------------------------------------------------------|-----------------|-------------------------------------------------|---------------------------------------|--------------------------|-----------------|---------------------------------|-------------------------------------------------------------------------------------------------|
| Comparison: adaptive e-learning environments vs. other educational interventions |                 |                                                 |                                       |                          |                 |                                 |                                                                                                 |
| Casebeer, 2003<br>USA                                                            | PP; N = 181     | RCT; posttest-only, 2 groups                    | 4 sessions; 1 hour each               | NR                       | NR              | Knowledge<br>Skills             | 21-item multiple-choice questionnaire                                                           |
| Cook, 2008<br>USA                                                                | R; N = 122      | RXT; posttest-only, 4 groups                    | 4 sessions; 30 minutes each           | 126 days                 | NEE             | Knowledge                       | 69-item case-based multiple-choice questionnaire                                                |
| Crowley, 2010<br>USA                                                             | PP; N = 15      | RCT; pretest–posttest, 2 groups                 | 4 sessions; 4 hours each              | 138 days                 | P               | Skills                          | Virtual slide test to examine diagnostic accuracy                                               |
| de Ruijter, 2018<br>Netherlands                                                  | NP; N = 269     | RCT; pretest-posttest, 2 groups                 | No fixed sessions                     | 180 days                 | NEE             | Knowledge<br>Behavior           | 18-item true-false questionnaire (range 0–18)<br>9-item self-reported questionnaire (range 0–9) |
| Hayes-Roth, 2010<br>USA                                                          | MS, NS; N = 30  | RCT; pretest–posttest–retention-test, 3 groups  | NR; mean training time 2.36 hours     | NR                       | 1. NEE<br>2. NI | Skills<br>Knowledge             | 6-item written skill probe (range 6–18)<br>Unclear                                              |
| Lee, 2017<br>USA                                                                 | MS; N = 1522    | NRCT; pretest-posttest, 3 groups                | 5 sessions; NR                        | 42 days                  | NEE             | Skills<br>Behavior              | Multidimensional situation-based questions –RealIndex (range 0–100%)<br>Unclear                 |
| Micheel, 2017<br>USA                                                             | PP, NP; N = 751 | NRCT; pretest–posttest–retention-test, 2 groups | NR                                    | NR                       | NEE             | Knowledge                       | 10-item true-false questionnaire (range 0–10)                                                   |
| Morente, 2013<br>Spain                                                           | NS; N = 73      | RCT; pretest–posttest, 2 groups                 | 1 session; 4 hours                    | 1 day                    | T               | Knowledge                       | 22-item multiple-choice questionnaire (range 0–22)                                              |

|                                                                                                  |                   |                                                 |                                    |         |                    |           |                                                                 |
|--------------------------------------------------------------------------------------------------|-------------------|-------------------------------------------------|------------------------------------|---------|--------------------|-----------|-----------------------------------------------------------------|
| Munoz, 2010<br>Colombia                                                                          | MS; N = 40        | NRCT; pretest–posttest, 2 groups                | NR; mean training time 5.97 hours  | NR      | NEE                | Knowledge | 10-item multiple-choice questionnaire (range 0–10)              |
| Romito, 2016<br>USA                                                                              | R; N = 24         | NRCT; pretest–posttest–retention-test, 2 groups | 1 session; 30 minutes              | 1 day   | NEE & T            | Skills    | 22-item videoclip-based test                                    |
| Samulski, 2017<br>USA                                                                            | MS, R, PP; N = 36 | RXT; pretest–posttest, 2 groups                 | 2 sessions; 20 minutes to 14 hours | 1 month | P                  | Knowledge | 28-item multiple-choice questionnaire (range 0–100%)            |
| Thai, 2015<br>USA                                                                                | HSC; N = 87       | RCT; pretest–posttest–retention-test, 3 groups  | 1 session; 45 minutes              | 1 day   | 1. AEE<br>2. NEE   | Skills    | 14-item case-based test (range 0–100%)                          |
| Van Es, 2015<br>Australia                                                                        | R; N = 43         | RXT; posttest-only, 2 groups                    | 3 sessions; NR                     | 50 days | P                  | Knowledge | 7 to 21-item multiple-choice questionnaire (range 0–100%)       |
| Van Es, 2016<br>Australia                                                                        | MS; N = 46        | RXT; posttest-only, 2 groups                    | 3 sessions; 2 hours each           | 34 days | NEE                | Knowledge | Multiple-choice questionnaire                                   |
| Wong, 2015<br>Australia                                                                          | MS; N = 99        | RXT; posttest-only, 2 groups                    | 2 sessions; 1.5 hour each          | 14 days | NEE                | Knowledge | 8-item multiple-choice and interactive questions (range 0–100%) |
| Wong, 2017<br>USA                                                                                | MS; N = 178       | NRCT; pretest–posttest–retention-test, 3 groups | 1 session; NR                      | 35 days | 1. T<br>2. AEE & T | Skills    | Test to examine diagnostic accuracy                             |
| Woo, 2006<br>USA                                                                                 | MS; N = 73        | NRCT; pretest–posttest, 3 groups                | 1 session; 2 hours                 | 1 day   | 1. NEE<br>2. NI    | Knowledge | Short-response questionnaire                                    |
| <b>Comparison: adaptive e-learning vs. adaptive e-learning (two AEEs with design variations)</b> |                   |                                                 |                                    |         |                    |           |                                                                 |
| Crowley, 2007<br>USA                                                                             | R; N = 21         | RCT; pretest–posttest–retention-test, 2 groups  | 1 session; 4.5 hours               | 1 day   | AEE                | Knowledge | 51-item multiple-choice questionnaire (range 0–100%)            |
| El Saadawi, 2008<br>USA                                                                          | R; N = 20         | RXT; pretest–posttest, 2 groups                 | 2 sessions; 2 hours each           | 1 day   | AEE                | Skills    | Virtual slide test to examine diagnostic accuracy               |

|    |             |           |                                 |                             |        |     |           |                               |
|----|-------------|-----------|---------------------------------|-----------------------------|--------|-----|-----------|-------------------------------|
| 1  |             |           |                                 |                             |        |     |           |                               |
| 2  |             |           |                                 |                             |        |     |           |                               |
| 3  | El Saadawi, |           |                                 |                             |        |     |           |                               |
| 4  | 2010        | R; N = 23 | RXT; pretest–posttest, 2 groups | 2 sessions; 2.25 hours each | 2 days | AEE | Skills    | Virtual slide test to examine |
| 5  | USA         |           |                                 |                             |        |     |           | diagnostic accuracy           |
| 6  |             |           |                                 |                             |        |     |           |                               |
| 7  | Feyzi-      |           |                                 |                             |        |     |           |                               |
| 8  | Begnagh,    | R; N = 31 | RCT; pretest–posttest, 2 groups | 2 sessions; 2 & 3 hours     | 1 day  | AEE | Knowledge | Unspecified test              |
| 9  | 2014        |           |                                 |                             |        |     |           |                               |
| 10 | USA         |           |                                 |                             |        |     |           |                               |

328  
329 \* Participants: MS indicates medical students; NS, nursing students; R, residents (physicians in postgraduate training); PP, physicians in practice; NP, nurses in practice; HSC, health sciences  
330 students.

331 † Study design: RCT indicates randomized controlled trial; RXT, randomized crossover trial; NRCT, non-randomized controlled trial.

332 ‡ Comparison: AEE indicates adaptive e-learning environment; NEE, nonadaptive e-learning environment; NI, no-intervention control group; T, traditional (group lecture); P, paper (handout, textbook,  
333 or latent image cases).

## 334 **Characteristics of Adaptive E-Learning Environments**

335 We summarized the key characteristics of AEEs assessed in the 21 studies in table format (see  
336 **Table 2**). In terms of the clinical topics of the AEEs, the majority of AEEs focused on training  
337 medical students and residents in executing and/or interpreting diagnostic tests. Indeed, a  
338 significant proportion of the AEEs assessed focused on dermatopathology and cytopathology  
339 microscopy<sup>32-35 37 41 42 47</sup> (n=8). Other topics were diagnostic imaging<sup>43 46</sup> (n=2), behavior change  
340 counseling<sup>40 50</sup> (n=2), chronic disease management<sup>45 48</sup> (n=2), pressure ulcer evaluation<sup>49</sup> (n=1),  
341 childhood illness management<sup>38</sup> (n=1), electrocardiography<sup>51</sup> (n=1), fetal heart rate  
342 interpretation<sup>52</sup> (n=1), hemodynamics<sup>39</sup> (n=1), chlamydia screening (n=1)<sup>36</sup> and atrial  
343 fibrillation management (n=1)<sup>44</sup>.

344 The 21 AEEs examined were based on a wide variety of theoretical frameworks. The most  
345 frequently used framework was cognitive tutoring, adopted in 5 studies<sup>32-35 37</sup>, which refers to the  
346 use of a cognitive model. The integration of a cognitive model in an AEE implies the  
347 representation of all the knowledge in the field of interest in a way that is similar to the human  
348 mind for the purpose of understanding and predicting the cognitive processes of learners<sup>53</sup>. The  
349 second most used framework was perceptual learning, adopted in 3 studies<sup>46 51 52</sup>. Perceptual  
350 learning aims at improving information extraction skills of the environment and the development  
351 of automaticity in this respect in learners<sup>46</sup>. Interestingly, 2 studies used models from behavioral  
352 science, the Transtheoretical Model<sup>36</sup> and the I-Change Model<sup>50</sup>, to tailor the AEE to the  
353 theoretical determinants of clinical behavior change in nurses and physicians in practice.  
354 Theoretical frameworks relating to self-regulated learning<sup>35</sup>, learning styles<sup>38 48</sup>, guided mastery  
355<sup>40</sup>, and cognitive load<sup>43</sup>, problem-based-learning<sup>36</sup>, and situated learning<sup>36</sup> were also used.

1  
2  
3 356 Three main adaptive e-learning platforms were used by investigators in studies examined:  
4  
5 357 SlideTutor (n=4)<sup>33 37 54 55</sup>, Smart Sparrow (n=4)<sup>41-43 47</sup>, and the Perceptual Adaptive Learning  
6  
7 358 Module (PALM, n=3)<sup>51 52 56</sup>. SlideTutor is an AEE with algorithmic adaptivity which provides  
8  
9  
10 359 cases to be solved by learners under supervision by the system. These cases incorporate  
11  
12 360 dermatology virtual slides that must be examined by learners to formulate a diagnosis. An  
13  
14 361 expert knowledge base, consisting of evidence-diagnosis relationships, is used by SlideTutor to  
15  
16  
17 362 create a dynamic solution graph representing the current state of the learning process and to  
18  
19 363 determine the optimal instructional sequence<sup>55</sup>. Smart Sparrow is an AEE with designed  
20  
21 364 adaptivity which allows educators to determine adaptive factors, such as answers to questions,  
22  
23 365 response time to a question, and learner actions, to specify how the system will adapt the  
24  
25  
26 366 instructional sequence or provide feedback. These custom learning paths can be more or less  
27  
28 367 personalized<sup>42</sup>. PALM is an AEE with algorithmic adaptivity aiming to improve perceptual  
29  
30 368 learning through adaptive response-time-based sequencing to determine dynamically the spacing  
31  
32  
33 369 between different learning items based on each learner's accuracy and speed in interactive  
34  
35 370 learning trials<sup>51</sup>. Different custom adaptive e-learning platforms were used in other studies.

371

372

373 Table 2. Characteristics of adaptive e-learning environments.

| First Author, Year      | Clinical Topic(s)                                 | Theoretical Framework(s)                                                           | Platform                             | Adaptivity Subdomains  |                                                                              |                                                                         |                                                                                    |                                                                                                                                                  |
|-------------------------|---------------------------------------------------|------------------------------------------------------------------------------------|--------------------------------------|------------------------|------------------------------------------------------------------------------|-------------------------------------------------------------------------|------------------------------------------------------------------------------------|--------------------------------------------------------------------------------------------------------------------------------------------------|
|                         |                                                   |                                                                                    |                                      | Adaptivity Method      | Adaptivity Goals                                                             | Adaptivity Timing                                                       | Adaptivity Factors                                                                 | Adaptivity Types                                                                                                                                 |
| <b>Casebeer, 2003</b>   | Chlamydia screening                               | Transtheoretical model of change; Problem-based learning; Situated learning theory | NR                                   | Designed Adaptivity    | To increase learning effectiveness (knowledge, skills).                      | Throughout the training, after case-based and practice-based questions. | User answers to questions                                                          | <ul style="list-style-type: none"> <li>• Content</li> <li>• Navigation</li> </ul>                                                                |
| <b>Cook, 2008</b>       | Diabetes, hyperlipidemia, asthma, depression      | NR                                                                                 | NR                                   | Designed Adaptivity    | To increase learning efficiency (knowledge gain divided by learning time).   | After each case-based question in each module (17 to 21 times/module).  | User knowledge                                                                     | <ul style="list-style-type: none"> <li>• Content</li> <li>• Navigation</li> </ul>                                                                |
| <b>Crowley, 2007</b>    | Dermopathology; subepidermal vesicular dermatitis | Cognitive Tutoring                                                                 | SlideTutor                           | Algorithmic Adaptivity | To increase learning gains, metacognitive gains, and diagnostic performance. | At the beginning of each case.                                          | User actions: results of problem-solving tasks; requests for help                  | <ul style="list-style-type: none"> <li>• Content</li> <li>• Navigation</li> <li>• Presentation</li> <li>• Multimedia</li> <li>• Tools</li> </ul> |
| <b>Crowley, 2010</b>    | Dermopathology; melanoma                          | Cognitive Tutoring                                                                 | SlideTutor                           | Algorithmic Adaptivity | To improve reporting performance and diagnostic accuracy.                    | At the beginning of each case.                                          | User actions: results of problem-solving tasks; reporting tasks; requests for help | <ul style="list-style-type: none"> <li>• Content</li> <li>• Navigation</li> <li>• Presentation</li> <li>• Multimedia</li> <li>• Tools</li> </ul> |
| <b>de Ruijter, 2018</b> | Smoking cessation counseling                      | I-Change Model                                                                     | Computer-Tailored E-Learning Program | Designed Adaptivity    | To modify behavioral predictors and behavior.                                | At the beginning of the training.                                       | Demographics, behavioral predictors, behavior                                      | <ul style="list-style-type: none"> <li>• Content</li> </ul>                                                                                      |
| <b>El Saadawi, 2008</b> | Dermopathology; melanoma                          | Cognitive Tutoring                                                                 | ReportTutor                          | Algorithmic Adaptivity | To teach how to correctly identify and document all relevant                 | At the beginning of each case.                                          | User actions, report features                                                      | <ul style="list-style-type: none"> <li>• Content</li> <li>• Navigation</li> <li>• Presentation</li> <li>• Multimedia</li> </ul>                  |



|                            |                                                |                                                         |                                              |                        |                                                                                                                            |                                                      |                                                                                    |                                                                                                                                                  |
|----------------------------|------------------------------------------------|---------------------------------------------------------|----------------------------------------------|------------------------|----------------------------------------------------------------------------------------------------------------------------|------------------------------------------------------|------------------------------------------------------------------------------------|--------------------------------------------------------------------------------------------------------------------------------------------------|
|                            |                                                |                                                         |                                              |                        | prognostic factors in the diagnostic report.                                                                               |                                                      |                                                                                    |                                                                                                                                                  |
| <b>El Saadawi, 2010</b>    | Dermopathology                                 | Cognitive Tutoring                                      | SlideTutor                                   | Algorithmic Adaptivity | To facilitate transfer of performance gains to real-world tasks that do not provide direct feedback on intermediate steps. | During intermediate problem-solving steps.           | User actions: results of problem-solving tasks; reporting tasks; requests for help | <ul style="list-style-type: none"> <li>• Content</li> <li>• Navigation</li> <li>• Presentation</li> <li>• Multimedia</li> </ul>                  |
| <b>Feyzi-Begnagh, 2014</b> | Dermopathology; nodular and diffuse dermatitis | Cognitive Tutoring, Theories of Self-Regulated Learning | SlideTutor                                   | Algorithmic Adaptivity | To improve metacognitive and learning gains during problem solving.                                                        | During each case or immediately after each case.     | User actions: results of problem-solving tasks; reporting tasks; requests for help | <ul style="list-style-type: none"> <li>• Content</li> <li>• Navigation</li> <li>• Presentation</li> <li>• Multimedia</li> <li>• Tools</li> </ul> |
| <b>Hayes-Roth, 2010</b>    | Brief intervention training in alcohol abuse   | Guided Mastery                                          | STAR Workshop                                | NR                     | To improve attitudes and skills.                                                                                           | During clinical cases.                               | User scores, user-generated dialogue                                               | <ul style="list-style-type: none"> <li>• Content</li> <li>• Navigation</li> </ul>                                                                |
| <b>Lee, 2017</b>           | Treatment of atrial fibrillation               | NR                                                      | Learning Assessment Platform                 | Designed Adaptivity    | To increase learning effectiveness (knowledge, competence, confidence and practice).                                       | After learning gaps identified in the first session. | Learning gaps in relation to objectives                                            | <ul style="list-style-type: none"> <li>• Content</li> </ul>                                                                                      |
| <b>Micheel, 2017</b>       | Oncology                                       | Learning Style Frameworks                               | Learning-style tailored educational platform | Designed Adaptivity    | To increase learning effectiveness (knowledge).                                                                            | After assessing the learning style.                  | Learning style                                                                     | <ul style="list-style-type: none"> <li>• Presentation</li> <li>• Multimedia</li> <li>• Tools</li> </ul>                                          |

1  
2  
3  
4  
5  
6  
7  
8  
9  
10  
11  
12  
13  
14  
15  
16  
17  
18  
19  
20  
21  
22  
23  
24  
25  
26  
27  
28  
29  
30  
31  
32  
33  
34  
35  
36  
37  
38  
39  
40  
41  
42  
43  
44  
45  
46  
47

|                       |                                                                                 |                                                                    |               |                        |                                                                             |                                            |                                            |                                                                                                                                                  |
|-----------------------|---------------------------------------------------------------------------------|--------------------------------------------------------------------|---------------|------------------------|-----------------------------------------------------------------------------|--------------------------------------------|--------------------------------------------|--------------------------------------------------------------------------------------------------------------------------------------------------|
| <b>Morente, 2013</b>  | Pressure ulcer evaluation                                                       | NR                                                                 | ePULab        | Designed Adaptivity    | To increase learning effectiveness (knowledge, skills).                     | Each pressure ulcer evaluation.            | User skills                                | <ul style="list-style-type: none"> <li>• Content</li> </ul>                                                                                      |
| <b>Munoz, 2010</b>    | Management of childhood illness                                                 | Learning Styles Framework                                          | SIAS-ITS      | Designed Adaptivity    | To increase learning effectiveness and efficiency.                          | At the beginning of the training.          | User knowledge, user learning style        | <ul style="list-style-type: none"> <li>• Content</li> <li>• Tools</li> </ul>                                                                     |
| <b>Romito, 2016</b>   | Transoesophageal echocardiography                                               | Perceptual Learning                                                | TOE PALM      | Algorithmic Adaptivity | To improve response accuracy and response time.                             | After each clinical case.                  | User response accuracy, user response time | <ul style="list-style-type: none"> <li>• Content</li> <li>• Navigation</li> <li>• Multimedia</li> </ul>                                          |
| <b>Samulski, 2017</b> | Cytopathology; pap test, squamous lesions, glandular lesions                    | NR                                                                 | Smart Sparrow | Designed Adaptivity    | To improve learning effectiveness.                                          | During intermediate problem-solving steps. | User knowledge                             | <ul style="list-style-type: none"> <li>• Content</li> <li>• Navigation</li> </ul>                                                                |
| <b>Thai, 2015</b>     | Electrocardiography                                                             | Perceptual Learning Theory; Adaptive response-time based algorithm | PALM          | Algorithmic Adaptivity | To improve perceptual classification learning effectiveness and efficiency. | After each user response.                  | User response accuracy, user response time | <ul style="list-style-type: none"> <li>• Content</li> <li>• Presentation</li> <li>• Multimedia</li> <li>• Tools</li> </ul>                       |
| <b>Van Es, 2015</b>   | Diagnostic cytopathology; gynecology, fine needle aspiration, exfoliative fluid | NR                                                                 | Smart Sparrow | Designed Adaptivity    | To improve learning effectiveness.                                          | During intermediate problem-solving steps. | User responses                             | <ul style="list-style-type: none"> <li>• Content</li> <li>• Navigation</li> <li>• Presentation</li> <li>• Multimedia</li> </ul>                  |
| <b>Van Es, 2016</b>   | Diagnostic cytopathology; gynecology, fine needle aspiration, exfoliative fluid | NR                                                                 | Smart Sparrow | Designed Adaptivity    | To improve learning effectiveness.                                          | During intermediate problem-solving steps. | User responses                             | <ul style="list-style-type: none"> <li>• Content</li> <li>• Navigation</li> <li>• Presentation</li> <li>• Multimedia</li> <li>• Tools</li> </ul> |

1  
2  
3  
4  
5  
6  
7  
8  
9  
10  
11  
12  
13  
14  
15  
16  
17  
18  
19  
20  
21  
22  
23  
24  
25  
26  
27  
28  
29  
30  
31  
32  
33  
34  
35  
36  
37  
38  
39  
40  
41  
42  
43  
44  
45  
46  
47

|                   |                                            |                       |               |                        |                                                        |                                            |                                            |                                                                                                         |
|-------------------|--------------------------------------------|-----------------------|---------------|------------------------|--------------------------------------------------------|--------------------------------------------|--------------------------------------------|---------------------------------------------------------------------------------------------------------|
| <b>Wong, 2015</b> | Diagnostic imaging; chest X-rays, CT scans | Cognitive Load Theory | Smart Sparrow | Designed Adaptivity    | To improve learning effectiveness.                     | During intermediate problem-solving steps. | User responses                             | <ul style="list-style-type: none"> <li>• Content</li> </ul>                                             |
| <b>Wong, 2017</b> | Fetal heart rate interpretation            | Perceptual Learning   | PALM          | Algorithmic Adaptivity | To improve response accuracy and response time.        | After each clinical case.                  | User response accuracy, user response time | <ul style="list-style-type: none"> <li>• Content</li> <li>• Navigation</li> <li>• Multimedia</li> </ul> |
| <b>Woo, 2006</b>  | Hemodynamics; baroreceptor reflex          | NR                    | CIRCSIM-Tutor | Algorithmic Adaptivity | To improve knowledge related to problem-solving tasks. | After each user response.                  | User knowledge, user responses             | <ul style="list-style-type: none"> <li>• Content</li> <li>• Navigation</li> <li>• Tools</li> </ul>      |

374

375

376

1  
2  
3 377 We propose 5 subdomains that emerged from the review to characterize the adaptivity process of  
4  
5 378 AEEs reported in the 21 studies: adaptivity method, adaptivity goals, adaptivity timing,  
6  
7  
8 379 adaptivity factors and adaptivity types.  
9

### 10 380 **First Subdomain: Adaptivity Method**

11  
12  
13 381 This subdomain relates to the method of adaptivity that dictates how the AEE adapts instruction  
14  
15 382 to a learner. As we previously described, there are two main methods of adaptivity: *designed*  
16  
17 383 *adaptivity* and *algorithmic adaptivity*. The first is based on the expertise of the educator who  
18  
19 384 specifies how technology will react in a particular situation on the basis of the “if THIS, then  
20  
21 385 THAT” approach. The second refers to use of algorithms that will determine, for instance, the  
22  
23 386 extent of the learner’s knowledge and the optimal instructional sequence. In this review, 11 AEEs  
24  
25 387 employed designed adaptivity<sup>36 38 41-44 47-50 57</sup>, and 9 AEEs employes algorithmic adaptivity<sup>33 37 39</sup>  
26  
27 388 <sup>51 52 54-56 58</sup>. The adaptivity method wasn’t specified in one study<sup>40</sup>.  
28  
29  
30  
31

### 32 389 **Second Subdomain: Adaptivity Goals**

33  
34  
35 390 This subdomain relates to the purpose of the adaptivity process within the AEE. For most AEEs,  
36  
37 391 the adaptivity process aims primarily to increase the efficacy and/or efficiency of knowledge  
38  
39 392 acquisition and skills development relative to other training methods<sup>32 35 36 38-45 47-49 51</sup>. For  
40  
41 393 instance, several AEEs aimed to increase the diagnostic accuracy and reporting performance of  
42  
43 394 medical students and residents<sup>32-34 37 46 52</sup>. In one study, the goal of adaptivity was to modify  
44  
45 395 behavioral predictors and behavior in nurses<sup>50</sup>. In cases where two adaptive AEEs with certain  
46  
47 396 variations in their techno-pedagogical design are compared with each other, the adaptivity  
48  
49 397 process generally aims at improving the metacognitive and cognitive processes related to learning  
50  
51  
52 398 <sup>32 33 35</sup>.  
53  
54  
55  
56  
57  
58  
59  
60

### 399 Third Subdomain: Adaptivity Timing

400 This subdomain relates to *when* the adaptivity occurs during the learning process with the AEE.

401 In 19 out of 21 studies, the adaptivity occurred throughout the training with AEE, usually after an  
402 answer to a question or during intermediate problem-solving steps. However, in two studies,  
403 adaptivity was only implemented at the beginning of the training with the AEE following survey  
404 responses<sup>38 50</sup>.

### 405 Fourth Subdomain: Adaptivity Factors

406 This subdomain relates to the learner-related data (variables) upon which the adaptivity process is  
407 based. The most frequently targeted variable is the learner's scores after an assessment or a  
408 question within the AEE (e.g., knowledge/skills scores, response accuracy scores)<sup>38-43 45-47 49 51 52</sup>.  
409 Other frequently targeted variables include the learner's actions during its use of the AEE (e.g.,  
410 results of problem-solving tasks, results of reporting tasks, requests for help)<sup>32-35 37</sup>, and the  
411 learner's response time regarding a specific question or task<sup>46 51 52</sup>.

### 412 Fifth Subdomain: Adaptivity Types

413 The final subdomain relates to which types of adaptivity are mobilized in the AEE: content,  
414 navigation, multimedia, presentation and tools. In the context of this review, the adaptivity types  
415 are based upon the work of Knutov and colleagues<sup>12</sup>. Overall, 17 out of 21 (81%) AEEs  
416 examined integrated more than one type of adaptivity. *Content adaptivity* was the most used  
417 adaptivity type; it was implemented in all but one AEEs reviewed (n=20). Content adaptivity  
418 aims to adapt the textual information (curriculum content) to the learner's profile through  
419 different mechanisms and to different degrees<sup>12</sup>. *Navigation adaptivity* was the second most used  
420 adaptivity type (n=14). Navigation can be adapted in two ways; it can be enforced or suggested.

1  
2  
3 421 When enforced, an optimal personalized learning path is determined for the learner by an expert  
4  
5 422 educator or by the algorithms within the AEE. When suggested, there are several personalized  
6  
7 423 learning paths available to each learner, who can determine the path he prefers himself<sup>12</sup>. Most  
8  
9 424 reviewed studies included AEEs with enforced navigation, with one optimal personalized  
10  
11 425 learning path being determined by an expert educator or by the algorithm. *Multimedia adaptivity*  
12  
13 426 was the third most used adaptivity type (n=11). This adaptivity type, much like content adaptivity  
14  
15 427 which relates to textual information, implies the adaptivity of the multimedia elements of the  
16  
17 428 training such as videos, pictures, models, to the learner's profile. *Presentation adaptivity* was the  
18  
19 429 fourth most used adaptivity type (n=9). It implies the adaptivity of the layout of the page to the  
20  
21 430 digital device used, or to the learner's profile. *Tools adaptivity* was the least used adaptivity type  
22  
23 431 (n=8). This technique results in providing a different set of features or learning strategies for  
24  
25 432 different types of learners, such as different interfaces for problem solving, and knowledge  
26  
27 433 representation.

### 434 Risk of Bias Assessment

35  
36  
37 435 Results of included studies for the risk of bias assessment are presented in **Figure 2** and **Figure 3**.  
38  
39 436 In  $\geq 75\%$  of studies, biases related to similarity of baseline outcome measurements, blinding of  
40  
41 437 outcome assessment and selective reporting of outcomes were low. Moreover, in  $\geq 50\%$  of  
42  
43 438 studies, biases related to contamination were low. Regarding the blinding of outcome assessment,  
44  
45 439 in most studies, review authors judged that the outcomes of interest and the outcome  
46  
47 440 measurement were not likely to be influenced by the lack of blinding, since studies had objective  
48  
49 441 measures, i.e. an evaluative test of knowledge or skills. Regarding contamination bias, review  
50  
51 442 authors scored studies at high risk if they had a crossover design.  
52  
53  
54  
55  
56  
57  
58  
59  
60

1  
2  
3 443 However, in  $\geq 50\%$  of studies, biases related to random sequence generation, allocation  
4  
5 444 concealment, similarity of baseline characteristics, similarity of baseline characteristics, blinding  
6  
7 445 of participants and personnel, and incomplete outcome data were unclear or high. Regarding  
8  
9 446 random sequence generation, an important number of studies did not report on the method of  
10  
11 447 randomization used by investigators. As per Cochrane recommendations, all eligible studies  
12  
13 448 were included in the meta-analysis, regardless of the risk of bias assessment. Indeed, since almost  
14  
15 449 all studies scored overall at unclear risk of bias, Cochrane suggests to present an estimated  
16  
17 450 intervention effect based on all available studies, together with a description of the risk of bias in  
18  
19 451 individual domains <sup>30</sup>.

22  
23  
24  
25 452 [Insert Figure 2]

26  
27  
28 453 [Insert Figure 3]

## 30 31 454 **Quantitative Results**

### 32 33 34 455 **Efficacy of AEEs versus other educational interventions in improving knowledge**

35  
36  
37 456 The pooled ES (standardized mean difference [SMD] 0.70; 95% confidence interval [CI] -0.08-  
38  
39 457 1.49;  $Z = 1.76$ ,  $P 0.08$ ) of AEEs compared to other educational interventions in improving  
40  
41 458 knowledge suggests a medium to large effect (see **Figure 4**). However, this result is not  
42  
43 459 statistically significant. Significant statistical heterogeneity was observed among studies ( $I^2$   
44  
45 460 =97%,  $P < .00001$ ), and individual ESs ranged from -1.10 to 3.05. One study in particular <sup>45</sup>  
46  
47 461 reported a negative ES, but the difference between groups in knowledge scores was statistically  
48  
49 462 nonsignificant. Moreover, while participants using the AEE in the experimental group reported  
50  
51 463 the same knowledge scores as participants in the control group at the end of study, time spent on  
52  
53 464 instruction was reduced by 18% with the AEE compared to the nonadaptive e-learning  
54  
55  
56  
57  
58  
59  
60

1  
2  
3 465 environment, thus improving learning efficiency<sup>45</sup>. When that study<sup>45</sup> is removed from the meta-  
4  
5 466 analysis, the pooled ES becomes statistically significant (SMD 1.07; 95% CI 0.28-1.85; Z =2.67,  
6  
7 467 *P* 0.008).

9  
10  
11 468 [Insert Figure 4]  
12  
13

#### 14 469 Efficacy of AEEs versus other educational interventions in improving skills

15  
16  
17 470 As we considered ESs larger than 0.8 to be large<sup>59</sup>, the pooled ES (SMD 1.19; 95% CI 0.59-  
18  
19 471 1.79; Z =3.88, *P* 0.0001) of AEEs compared to other educational interventions in improving  
20  
21 472 skills suggests a significantly large effect (see **Figure 5**). Statistical heterogeneity was lower than  
22  
23 473 in previous analyses, but was still significant ( $I^2$  =89%, *P* <.00001). Individual ESs ranged from  
24  
25 474 0.17 to 2.87.

26  
27  
28  
29 475 [Insert Figure 5]  
30  
31

32 476 For both knowledge and skills, we conducted subgroup analyses according to population (health  
33  
34 477 professionals versus students) and comparator (adaptive e-learning versus nonadaptive e-  
35  
36 478 learning, adaptive e-learning versus paper-based instruction, adaptive e-learning versus  
37  
38 479 classroom-based instruction). No statistically significant differences between subgroups were  
39  
40 480 found regarding the effect sizes.  
41  
42  
43

#### 44 481 Quality of the Evidence

45  
46  
47  
48 482 The quality of evidence table produced with GRADE, as well as the justifications for each  
49  
50 483 decision, is presented in **Supplementary File 3** (GRADE quality of evidence levels: very low, low,  
51  
52 484 moderate, high). For knowledge, the quality of evidence was deemed to be very low. More  
53  
54 485 precisely, risk of bias was deemed serious, inconsistency serious, indirectness not serious, and  
55  
56  
57  
58  
59  
60



1  
2  
3 486 imprecision serious. For skills, the quality of evidence was deemed to be low. More precisely,  
4  
5 487 risk of bias was deemed serious, inconsistency serious, indirectness not serious, and imprecision  
6  
7 488 serious.  
8  
9

## 10 489 **DISCUSSION**

### 11 490 **Principal Findings**

12  
13  
14 491 This is the first systematic review and meta-analysis to evaluate the efficacy of AEEs in health  
15  
16 492 professionals and students. We identified 21 relevant studies published since 2003, 17 of which  
17  
18 493 assessed an AEE versus another educational intervention (large-group classroom instruction,  
19  
20 494 nonadaptive e-learning environment or paper-based learning), and 4 of which assessed 2 AEEs  
21  
22 495 with design variations head-to-head. When compared with other educational interventions, AEEs  
23  
24 496 were associated with statistically significant improvements in learning outcomes in 12 out of 17  
25  
26 497 studies. Pooled ESs were medium to large for knowledge and large for skills, but only the latter  
27  
28 498 was associated with a statistically significant effect. Statistical heterogeneity was high in all  
29  
30 499 analyses. However, this finding is consistent with other meta-analyses in the field of medical  
31  
32 500 education that also reported high heterogeneity across studies<sup>8 60 61</sup>. No potential effect modifiers  
33  
34 501 were found during subgroup analyses, and these did not help in explaining the source of the  
35  
36 502 heterogeneity. The quality of evidence for all comparisons was either low or very low. Therefore,  
37  
38 503 while we believe the results support the potential of AEEs for the education of health  
39  
40 504 professionals and students, we recommend interpreting the ESs with caution.  
41  
42  
43  
44  
45  
46  
47  
48  
49

### 50 505 **Comparison with Other Studies**

51  
52  
53 506 To our knowledge, no previous systematic review and meta-analysis has specifically assessed the  
54  
55 507 efficacy of AEEs in improving learning outcomes in health professionals and students, or any  
56  
57  
58  
59  
60

1  
2  
3 508 other population. However, interestingly, since the 1990's there has been a strong research  
4  
5 509 interest in the field of AEEs with algorithmic adaptivity (also known as intelligent learning  
6  
7 510 environments [IEEs] or intelligent tutoring systems [ITSs]) into elementary, high school and  
8  
9  
10 511 postsecondary education for multiple subjects<sup>17</sup>. Thus, multiple meta-analyses have been  
11  
12 512 conducted with regard to AEEs in that setting.  
13  
14

15 513 Steenbergen-Hu and Cooper<sup>15</sup> reported a mean ES of 0.35 of AEEs with algorithmic adaptivity  
16  
17 514 on learning outcomes in college students when compared to all other types of educational  
18  
19 515 interventions. The mean ES was 0.37 when the comparator was large-group classroom  
20  
21 516 instruction, 0.35 when the comparator was nonadaptive e-learning, and 0.47 when the comparator  
22  
23 517 was textbooks or workbooks<sup>15</sup>.  
24  
25  
26

27  
28 518 Ma, et al.<sup>18</sup> reported a mean ES of 0.42 of AEEs with algorithmic adaptivity on learning  
29  
30 519 outcomes in elementary, high school and postsecondary students when compared to large-group  
31  
32 520 classroom instruction. The mean ES was 0.57 when the comparator was nonadaptive e-learning,  
33  
34 521 and 0.35 when the comparator was textbooks or workbooks. Interestingly, the mean ES was  
35  
36 522 higher for studies which assessed an AEE in biology and physiology (0.59) and in humanities and  
37  
38 523 social science (0.63) than in studies which assessed an AEE in mathematics (0.35) and physics  
39  
40 524 (0.38)<sup>18</sup>.  
41  
42  
43

44 525 Kulik and Fletcher<sup>17</sup> reported a mean ES of 0.65 of AEEs with algorithmic adaptivity on  
45  
46 526 learning outcomes in elementary, high school, and postsecondary students when compared to  
47  
48 527 large-group classroom instruction. Education areas in this review were diverse (e.g.,  
49  
50 528 mathematics, computer science, physics), but none were related to health sciences. Interestingly,  
51  
52 529 the mean ES was 0.78 for studies up to 80 participants, and 0.30 for studies with more than 250  
53  
54  
55  
56  
57  
58  
59

1  
2  
3 530 participants. Moreover, the mean ES for studies conducted with elementary and high school  
4  
5 531 students was 0.44, compared to 0.75 for studies conducted with postsecondary students<sup>17</sup>.  
6  
7  
8 532 Thus, in light of the results of these meta-analyses, the ES reported in our review may appear  
9  
10 533 high. However, our review looked more specifically into the efficacy of AEEs in improving  
11  
12 534 learning outcomes in health professionals and students. This is significant since, in the meta-  
13  
14 535 analyses of Steenbergen-Hu and Cooper<sup>15</sup>, Ma, et al.<sup>18</sup>, and Kulik and Fletcher<sup>17</sup>, AEEs seem to  
15  
16 536 be more effective in postsecondary students<sup>17 18</sup> and for learning subjects related to biology,  
17  
18 537 physiology and social science<sup>18</sup>. Moreover, previous meta-analyses focused on the efficacy of  
19  
20 538 AEEs in improving procedural and declarative knowledge, and did not report on the efficacy on  
21  
22 539 AEEs in improving skills. This is important since AEEs may be more effective for providing  
23  
24 540 tailored guidance and coaching for developing skills regarding complex clinical interventions,  
25  
26 541 rather than learning factual knowledge, which generates less cognitive load<sup>62 63</sup>.  
27  
28  
29  
30  
31

## 32 542 **Implications for Practice and Research**

33  
34  
35 543 This review provides important implications for the design and development of AEEs for health  
36  
37 544 professionals and students. Table 3 presents 8 practical considerations for the design and  
38  
39 545 development of adaptive e-learning environments based on the results of this systematic review  
40  
41 546 for educators and educational researchers.  
42  
43  
44

45 547 **Table 3. Practical considerations for the design and development of adaptive e-learning**  
46 548 **environments.**

| Practical considerations           | Explanations                                                                                                                                                                                                                                                                                                                                       |
|------------------------------------|----------------------------------------------------------------------------------------------------------------------------------------------------------------------------------------------------------------------------------------------------------------------------------------------------------------------------------------------------|
| Developing the Educational Content | <ul style="list-style-type: none"> <li>Given the adaptivity and the different learning pathways inherent to adaptive e-learning environments (AEEs), it is necessary to develop more pedagogical content (e.g. 60 minutes of learning) to reach the planned duration of each adaptive e-learning session (e.g. 30 minutes of learning).</li> </ul> |

|                                                                                            |                                                                                                                                                                                                                                                                                                                                                                                                                                                                                                                                                                                                                                                                                                                                                                                                                          |
|--------------------------------------------------------------------------------------------|--------------------------------------------------------------------------------------------------------------------------------------------------------------------------------------------------------------------------------------------------------------------------------------------------------------------------------------------------------------------------------------------------------------------------------------------------------------------------------------------------------------------------------------------------------------------------------------------------------------------------------------------------------------------------------------------------------------------------------------------------------------------------------------------------------------------------|
| <b>Selecting a Theoretical Framework</b>                                                   | <ul style="list-style-type: none"> <li>Selecting a theoretical framework coherent with the underlining principles of adaptivity of AEEs is crucial. These frameworks can be related to human cognition (e.g. Cognitive Load Theory, Cognitive Tutoring), behavior change (e.g. Transtheoretical model, I-Change Model) or learning (e.g. Perceptual Learning, Situated Learning).</li> </ul>                                                                                                                                                                                                                                                                                                                                                                                                                             |
| <b>Selecting the Adaptivity Method</b>                                                     | <ul style="list-style-type: none"> <li>Selecting the adaptivity method refers to how the AEE will adapt its instructional sequence. There are two main adaptivity methods:             <ul style="list-style-type: none"> <li><i>Designed adaptivity</i> is based on the expertise of the educator who designs personalized pathways to guide learners to learning content mastery;</li> <li><i>Algorithmic adaptivity</i> is based on different algorithms to determine, for instance, the extent of the learner's knowledge and the optimal instructional pathway.</li> </ul> </li> </ul>                                                                                                                                                                                                                              |
| <b>Selecting the Adaptivity Goal(s)</b>                                                    | <ul style="list-style-type: none"> <li>Selecting the adaptivity goal(s) is important, since it will dictate how the instruction will be adapted in the AEE. The goal of adaptivity within an AEE may be to increase learning effectiveness, increase learning efficiency, modify behavioral predictors, or improve cognitive/metacognitive processes related to learning.</li> </ul>                                                                                                                                                                                                                                                                                                                                                                                                                                     |
| <b>Selecting the Adaptivity Timing</b>                                                     | <ul style="list-style-type: none"> <li>Selecting the timing of adaptivity within an AEE relates to <i>when</i> the adaptivity occurs during the learning process. Adaptivity can be implemented at the beginning of the training only, or throughout the training. Adaptivity timing is closely linked to which adaptivity factor(s) are targeted in learners.</li> </ul>                                                                                                                                                                                                                                                                                                                                                                                                                                                |
| <b>Selecting the Adaptivity Factor(s)</b>                                                  | <ul style="list-style-type: none"> <li>Adaptivity factors are essentially data upon which the adaptivity process is based. These data can be related to the learner's performance (e.g. knowledge, skills), his behavior / actions on the page (e.g. response time, requests for help), his overall learning path on the platform, or any other variables of interest in the learner.</li> </ul>                                                                                                                                                                                                                                                                                                                                                                                                                         |
| <b>Selecting the Adaptivity Type(s)</b>                                                    | <ul style="list-style-type: none"> <li>Multiple types of adaptivity can be implemented in an AEE:             <ul style="list-style-type: none"> <li><i>Content adaptivity</i> refers to the adaptation of the textual information;</li> <li><i>Navigation adaptivity</i> refers to the adaptation of the curriculum sequence;</li> <li><i>Presentation adaptivity</i> refers to the adaptation of layout of the screen to the digital device used, or to the learner's profile;</li> <li><i>Multimedia adaptivity</i> refers to the adaptation of multimedia elements of the training such as videos, pictures, models;</li> <li><i>Tools adaptivity</i> refers to the adaptation of training features, learning strategies or learning assessment methods (e.g. interface for problem solving).</li> </ul> </li> </ul> |
| <b>Determining your technical resources and selecting the adaptive e-learning platform</b> | <ul style="list-style-type: none"> <li>After the content has been developed, the theoretical framework has been selected and the decisions related to the different subdomains adaptivity have been made, it is crucial to determine your technical resources and evaluate preexisting adaptive e-learning software to determine if it meets your needs and goals. If you plan to employ a specialist or team to develop the platform, estimate development cost and timeline.</li> </ul>                                                                                                                                                                                                                                                                                                                                |

549 This review also provides several key insights for future research. In terms of *population*, future  
 550 research should focus on assessing AEEs with health professionals in practice, such as registered  
 551 nurses and physicians, rather than students in these disciplines. This could provide key insights  
 552 into how AEEs can impact clinical behavior and, ultimately, patient outcomes. In addition,  
 553 investigators should target larger sample sizes. In terms of *interventions*, researchers should

1  
2  
3 554 report more clearly on adaptivity methods, goals, timing, factors and types. Moreover,  
4  
5 555 researchers should provide additional details regarding the underlining algorithms allowing the  
6  
7 556 adaptivity process in order to ensure replicability of findings. Regarding *comparators*, this review  
8  
9  
10 557 suggests there is a need for additional research using traditional comparators (i.e., large group  
11  
12 558 classroom instruction) and more specific comparators (i.e., adaptive e-learning environment with  
13  
14 559 design variations). Regarding *outcomes* and outcome measures, researchers should use validated  
15  
16  
17 560 measurement tools of knowledge, skills, and clinical behavior to facilitate knowledge synthesis.  
18  
19 561 Moreover, the very low number of studies assessing the impact of AEEs on health professionals'  
20  
21 562 and students' clinical behavior demonstrates the need for further research with higher-level  
22  
23 563 outcomes. Finally, in terms of *study designs*, researchers should focus on research designs  
24  
25  
26 564 allowing the assessment of the impact of multiple educational design variations and adaptivity  
27  
28 565 types within one study, such as factorial experiments.

## 31 566 **Strengths and Limitations**

32  
33  
34 567 Strengths of this systematic review and meta-analysis include the prospective registration and  
35  
36 568 publication of a protocol based on rigorous methods in accordance with Cochrane and PRISMA  
37  
38 569 guidelines; the exhaustive search in all relevant databases; the independent screening of the titles,  
39  
40  
41 570 abstracts and full-text of studies; the assessment of each included studies' risk of bias using  
42  
43 571 EPOC Cochrane guidelines; and the assessment of the quality of evidence for each individual  
44  
45  
46 572 outcome using the GRADE methodology.

47  
48  
49 573 Our review also has limitations to consider. First, outcome measures varied widely across  
50  
51 574 studies. To address this issue, we conducted the meta-analysis using the SMD. Using the SMD  
52  
53  
54 575 allowed us to standardize the results of studies to a uniform scale before pooling them. Review

1  
2  
3 576 authors judged that using the SMD was the best option for this review, as it is the current practice  
4  
5 577 in the field of knowledge synthesis in medical education<sup>6 60</sup>.

6  
7  
8 578 Second, there was high inconsistency among study results, which we can mostly attribute to  
9  
10 579 differences in populations, AEE design, research methods, and outcomes. This resulted in  
11  
12 580 sometimes widely differing estimates of effect. To partly address this issue, we used a random-  
13  
14 581 effects model for the meta-analysis, which assumes that the effects estimated in the studies are  
15  
16 582 different and follow a distribution<sup>30</sup>. However, since a random-effects model awards more  
17  
18 583 weight to smaller studies to learn about the distribution of effects, it could potentially exacerbate  
19  
20 584 the effects of the bias in these studies<sup>30</sup>.

21  
22 585 Finally, publication bias could not be assessed by the means of a funnel plot since there were less  
23  
24 586 than 10 studies included in the meta-analysis.

## 25 587 **CONCLUSIONS**

26  
27 588 Adaptive e-learning has significant potential to increase the effectiveness and efficiency of  
28  
29 589 learning in health professionals and students. Through the different sub-domains of the adaptivity  
30  
31 590 process (i.e. method, goals, timing, factors, types), AEEs can take into account the particularities  
32  
33 591 inherent to each learner. This systematic review and meta-analysis underlines the potential of  
34  
35 592 AEEs for improving knowledge and skills in health professionals and students in comparison  
36  
37 593 with other educational interventions, such as nonadaptive e-learning environments and large-  
38  
39 594 group classroom learning, across a range of topics. However, evidence was either of low or very  
40  
41 595 low quality and heterogeneity was high across populations, interventions, comparators, and  
42  
43 596 outcomes. Thus, additional comparative studies assessing the efficacy of AEEs in health  
44  
45 597 professionals and students are needed to strengthen the quality of evidence .

## 598 AUTHOR CONTRIBUTIONS

599 All review authors contributed to at least one aspect of each of the four criteria for authorship  
600 defined by the International Committee for Medical Journal Editors (ICJME).

601 G.F. contributed to the conception and design of the review, to the acquisition and analysis of  
602 data, and to the interpretation of results. Moreover, G.F. drafted the initial manuscript. S.C.  
603 contributed to the conception and design of the review, and to the interpretation of results. M.-  
604 A.M.-C. contributed to the conception and design of the review, to the acquisition of data, and  
605 interpretation of results. T.M. contributed to the conception and design of the review, to the  
606 acquisition of data, and to the interpretation of results. M.-F.D. contributed to the conception and  
607 design of the review, to the acquisition of data, and to the interpretation of results. G.M.-D.  
608 contributed to the conception and design of the review, and to the interpretation of results. J.C.  
609 contributed to the interpretation of results. M.-P.G. contributed to the interpretation of results.  
610 V.D. contributed to the interpretation of results.

611 All review authors contributed to manuscript writing, critically revised the manuscript, gave final  
612 approval, and agreed to be accountable for all aspects of work, ensuring integrity and accuracy.

## 613 DATA SHARING STATEMENT

614 All data relevant to the study are included in the article or uploaded as supplementary  
615 information.

## 616 ACKNOWLEDGEMENTS

617 G.F. was supported by the Vanier Canada Graduate Scholarship (Canadian Institutes of Health  
618 Research), a doctoral fellowship from Quebec's Healthcare Research Fund, the AstraZeneca and

1  
2  
3 619 Dr. Kathryn J. Hannah scholarships from the Canadian Nurses Foundation, a doctoral scholarship  
4  
5 620 from the Montreal Heart Institute Foundation, a doctoral scholarship from Quebec's Ministry of  
6  
7 621 Higher Education, and multiple scholarships from the Faculty of Nursing at the University of  
8  
9 622 Montreal. M.-A.M.-C. was supported by a doctoral fellowship from Quebec's Healthcare  
10  
11 623 Research Fund, a doctoral scholarship from the Montreal Heart Institute Foundation, a doctoral  
12  
13 624 scholarship from Quebec's Ministry of Higher Education, and multiple scholarships from the  
14  
15 625 Faculty of Nursing at the University of Montreal. T.M. was supported by a postdoctoral  
16  
17 626 fellowship from Quebec's Healthcare Research Fund, a postdoctoral scholarship from the  
18  
19 627 Montreal Heart Institute Foundation. M.-F.D. was supported by a doctoral fellowship from  
20  
21 628 Canada's Social Sciences and Humanities Research Council, and a scholarship from the Center  
22  
23 629 for Innovation in Nursing Education.  
24  
25  
26  
27  
28

## 29 630 **FIGURE LEGENDS**

30  
31  
32 631 Figure 1. PRISMA Study Flow Diagram.  
33  
34

35  
36 632 Figure 2. Risk of bias summary: review authors' judgements about each risk of bias item for each  
37  
38 633 included study.  
39  
40

41 634 Figure 3. Risk of bias graph: review authors' judgements about each risk of bias item presented as  
42  
43 635 percentages across all included studies.  
44  
45

46 636 Figure 4. Forest plot representing the meta-analysis of the efficacy of adaptive e-learning versus  
47  
48 637 other educational interventions in improving knowledge.  
49  
50

51  
52 638 Figure 5. Forest plot representing the meta-analysis of the efficacy of adaptive e-learning versus  
53  
54 639 other educational interventions in improving skills.  
55  
56  
57  
58  
59  
60



## 640 REFERENCES

- 641 1. Clark R, Mayer R. E-Learning and the Science of Instruction: Proven Guidelines for  
642 Consumers and Designers of Multimedia Learning. 4 ed. Hoboken, NJ: John Wiley &  
643 Sons 2016.
- 644 2. Cheng B, Wang M, Mørch AI, et al. Research on e-learning in the workplace 2000–2012: A  
645 bibliometric analysis of the literature. *Educational Research Review* 2014;11:56-72. doi:  
646 10.1016/j.edurev.2014.01.001
- 647 3. Fontaine G, Cossette S, Heppell S, et al. Evaluation of a web-based e-learning platform for  
648 brief motivational interviewing by cardiovascular care nurses: a pilot study. *Journal of*  
649 *Medical Internet Research* 2016;8(18):e224. doi: 10.2196/jmir.6298 [published Online  
650 First: August 18th 2016]
- 651 4. George PP, Papachristou N, Belisario JM, et al. Online eLearning for undergraduates in health  
652 professions: A systematic review of the impact on knowledge, skills, attitudes and  
653 satisfaction. *J Glob Health* 2014;4(1):010406. doi: 10.7189/jogh.04.010406
- 654 5. Lahti M, Hatonen H, Valimaki M. Impact of e-learning on nurses' and student nurses  
655 knowledge, skills, and satisfaction: a systematic review and meta-analysis. *International*  
656 *journal of nursing studies* 2014;51(1):136-49. doi: 10.1016/j.ijnurstu.2012.12.017  
657 [published Online First: 2013/02/07]
- 658 6. Cook, Levinson AJ, Garside S, et al. Internet-based learning in the health professions: a meta-  
659 analysis. *Journal of the American Medical Association* 2008;300(10):1181-96. doi:  
660 10.1001/jama.300.10.1181
- 661 7. Sinclair PM, Kable A, Levett-Jones T, et al. The effectiveness of Internet-based e-learning on  
662 clinician behaviour and patient outcomes: A systematic review. *International Journal of*  
663 *Nursing Studies* 2016;57:70-81. doi: 10.1016/j.ijnurstu.2016.01.011
- 664 8. Voutilainen A, Saaranen T, Sormunen M. Conventional vs. e-learning in nursing education: A  
665 systematic review and meta-analysis. *Nurse Education Today* 2017;50:97-103. doi:  
666 10.1016/j.nedt.2016.12.020
- 667 9. Ellaway RH, Pusic MV, Galbraith RM, et al. Developing the role of big data and analytics in  
668 health professional education. *Medical Teacher* 2014;36(3):216-22. doi:  
669 10.3109/0142159X.2014.874553
- 670 10. Desmarais MC, Baker RSJ. A review of recent advances in learner and skill modeling in  
671 intelligent learning environments. *User Modeling and User-Adapted Interaction*  
672 2012;22(1-2):9-38. doi: 10.1007/s11257-011-9106-8
- 673 11. Knutov E, De Bra P, Pechenizkiy M. Generic adaptation framework: A process-oriented  
674 perspective. *Journal of Digital Information* 2011;12(1):1-22.

- 1  
2  
3 675 12. Knutov E, De Bra P, Pechenizkiy M. AH 12 years later: A comprehensive survey of adaptive  
4 676 hypermedia methods and techniques. *New Review of Hypermedia and Multimedia*  
5 677 2009;15(1):5-38. doi: 10.1080/13614560902801608  
6  
7 678 13. Akbulut Y, Cardak CS. Adaptive educational hypermedia accommodating learning styles: A  
8 679 content analysis of publications from 2000 to 2011. *Computers & Education*  
9 680 2012;58(2):835-42. doi: 10.1016/j.compedu.2011.10.008  
10  
11 681 14. Brusilovsky P, Peylo C. Adaptive and Intelligent Web-based Educational Systems.  
12 682 *International Journal of Artificial Intelligence in Education* 2003;13:159-72.  
13  
14 683 15. Steenbergen-Hu S, Cooper H. A meta-analysis of the effectiveness of intelligent tutoring  
15 684 systems on college students' academic learning. *Journal of Educational Psychology*  
16 685 2014;106(2):331-47. doi: 10.1037/a0034752  
17  
18 686 16. Steenbergen-Hu S, Cooper H. A meta-analysis of the effectiveness of intelligent tutoring  
19 687 systems on K-12 students' mathematical learning. *Journal of Educational Psychology*  
20 688 2013;105(4):970-87. doi: 1037/a0032447  
21  
22 689 17. Kulik JA, Fletcher JD. Effectiveness of intelligent tutoring systems: A meta-analytic review.  
23 690 *Review of Educational Research* 2015;86(1):42-78. doi: 10.3102/0034654315581420  
24  
25 691 18. Ma W, Adesope OO, Nesbit JC, et al. Intelligent Tutoring Systems and Learning Outcomes:  
26 692 A Meta-Analysis. *Journal of Educational Psychology* 2014;106(4):901-18. doi:  
27 693 10.1037/a0037123  
28  
29 694 19. Evens M, Michael J. One-on-one tutoring by humans and computers. Mahwah, NJ:  
30 695 Psychology Press 2006.  
31  
32 696 20. Strengers Y, Moloney S, Maller C, et al. Beyond behaviour change: practical applications of  
33 697 social practice theory in behaviour change programmes. In: Strengers Y, Maller C, eds.  
34 698 *Social Practices, Interventions and Sustainability*. New York, NY: Routledge 2014:63-77.  
35  
36 699 21. Nesbit JC, Adesope OO, Liu Q, et al. How Effective are Intelligent Tutoring Systems in  
37 700 Computer Science Education? IEEE 14th International Conference on Advanced Learning  
38 701 Technologies (ICALT). Athens, Greece, 2014.  
39  
40 702 22. Cochrane Effective Practice and Organisation of Care (EPOC). EPOC resources for review  
41 703 authors 2017 [Available from: [http://epoc.cochrane.org/resources/epoc-resources-review-](http://epoc.cochrane.org/resources/epoc-resources-review-authors)  
42 704 [authors](http://epoc.cochrane.org/resources/epoc-resources-review-authors).  
43  
44 705 23. Moher D, Shamseer L, Clarke M, et al. Preferred reporting items for systematic review and  
45 706 meta-analysis protocols (PRISMA-P) 2015 statement. *Systematic Reviews* 2015;4(1) doi:  
46 707 10.1186/2046-4053-4-1  
47  
48 708 24. Fontaine G, Cossette S, Maheu-Cadotte MA, et al. Effectiveness of Adaptive E-Learning  
49 709 Environments on Knowledge, Competence, and Behavior in Health Professionals and  
50  
51  
52  
53  
54  
55  
56  
57  
58  
59  
60

- 1  
2  
3 710 Students: A Protocol for a Systematic Review and Meta-Analysis. *JMIR Research*  
4 711 *Protocols* 2017;6(7):e128. doi: 10.2196/resprot.8085  
5  
6 712 25. Moja L, Moschetti I, Cinquini M, et al. Clinical evidence continuous medical education: a  
7 713 randomised educational trial of an open access e-learning program for transferring  
8 714 evidence-based information–ICEKUBE (Italian Clinical Evidence Knowledge Utilization  
9 715 Behaviour Evaluation)–study protocol. *Implementation Science* 2008;3(1):37. doi:  
10 716 10.1186/1748-5908-3-37  
11  
12  
13 717 26. Miller GE. The assessment of clinical skills/competence/performance. *Academic Medicine*  
14 718 1990(Suppl 2):S63-S67.  
15  
16 719 27. EPOC Cochrane Review Group. What study designs should be included in an EPOC review  
17 720 and what should they be called? 2014 [Available from:  
18 721 [https://epoc.cochrane.org/sites/epoc.cochrane.org/files/public/uploads/EPOC%20Study%](https://epoc.cochrane.org/sites/epoc.cochrane.org/files/public/uploads/EPOC%20Study%20Designs%20About.pdf2017)  
19 722 [20Designs%20About.pdf2017](https://epoc.cochrane.org/sites/epoc.cochrane.org/files/public/uploads/EPOC%20Study%20Designs%20About.pdf2017).  
20  
21  
22 723 28. EPOC Cochrane Review Group. Data extraction and management: EPOC Resources for  
23 724 review authors Oslo, Norway: Norwegian Knowledge Centre for the Health Services;  
24 725 2013 [Available from: <http://epoc.cochrane.org/epoc-specific-resources-review-authors>.  
25  
26 726 29. Higgins JP, Thompson SG, Deeks JJ, et al. Measuring inconsistency in meta-analyses. *BMJ*  
27 727 2003;327(7414):557-60. doi: 10.1136/bmj.327.7414.557  
28  
29  
30 728 30. Higgins JPT, Green S. *Cochrane Handbook for Systematic Reviews of Interventions* Version  
31 729 5.1.0.: The Cochrane Collaboration 2011.  
32  
33 730 31. Guyatt GH, Oxman AD, Vist GE, et al. GRADE: an emerging consensus on rating quality of  
34 731 evidence and strength of recommendations. *BMJ: British Medical Journal*  
35 732 2008;336(7650):924-26. doi: 10.1136/bmj.39489.470347.AD  
36  
37 733 32. Crowley RS, Legowski E, Medvedeva O, et al. Evaluation of an intelligent tutoring system in  
38 734 pathology: effects of external representation on performance gains, metacognition, and  
39 735 acceptance. *J Am Med Inform Assoc* 2007;14(2):182-90. doi: 10.1197/jamia.M2241  
40 736 [published Online First: 2007/01/11]  
41  
42  
43 737 33. El Saadawi GM, Azevedo R, Castine M, et al. Factors affecting feeling-of-knowing in a  
44 738 medical intelligent tutoring system: the role of immediate feedback as a metacognitive  
45 739 scaffold. *Adv Health Sci Educ Theory Pract* 2010;15(1):9-30. doi: 10.1007/s10459-009-  
46 740 9162-6 [published Online First: 2009/05/13]  
47  
48  
49 741 34. El Saadawi GM, Tseytlin E, Legowski E, et al. A natural language intelligent tutoring system  
50 742 for training pathologists: implementation and evaluation. *Adv Health Sci Educ Theory*  
51 743 *Pract* 2008;13(5):709-22. doi: 10.1007/s10459-007-9081-3 [published Online First:  
52 744 2007/10/16]  
53  
54  
55  
56  
57  
58  
59

- 1  
2  
3 745 35. Feyzi-Behnagh R, Azevedo R, Legowski E, et al. Metacognitive scaffolds improve self-  
4 746 judgments of accuracy in a medical intelligent tutoring system. *Instr Sci* 2014;42(2):159-  
5 747 81. doi: 10.1007/s11251-013-9275-4 [published Online First: 2014/02/18]  
6  
7 748 36. Casebeer LL, Strasser SM, Spettell CM, et al. Designing tailored Web-based instruction to  
8 749 improve practicing physicians' preventive practices. *J Med Internet Res* 2003;5(3):e20.  
9 750 doi: 10.2196/jmir.5.3.e20 [published Online First: 2003/10/01]  
10  
11  
12 751 37. Alevon V, Kay J, Mostow J, eds. Use of a medical ITS improves reporting performance  
13 752 among community pathologists. *Intelligent Tutoring Systems*; 2010; Pittsburgh, PA.  
14 753 Springer Berlin/Heidelberg.  
15  
16 754 38. Munoz DC, Ortiz A, Gonzalez C, et al. Effective e-learning for health professional and  
17 755 medical students: the experience with SIAS-Intelligent Tutoring System. *Stud Health*  
18 756 *Technol Inform* 2010;156:89-102. [published Online First: 2010/06/15]  
19  
20  
21 757 39. Woo CW, Evens MW, Freedman R, et al. An intelligent tutoring system that generates a  
22 758 natural language dialogue using dynamic multi-level planning. *Artificial intelligence in*  
23 759 *medicine* 2006;38(1):25-46. doi: 10.1016/j.artmed.2005.10.004 [published Online First:  
24 760 2005/12/15]  
25  
26 761 40. Hayes-Roth B, Saker R, Amano K. Automating individualized coaching and authentic role-  
27 762 play practice for brief intervention training. *Methods of Information in Medicine*  
28 763 2010;49(3):406-11.  
29  
30  
31 764 41. Samulski TD, Taylor LA, La T, et al. The utility of adaptive eLearning in cervical  
32 765 cytopathology education. *Cancer Cytopathology* 2017:1-7. doi: 10.1002/cncy.21942  
33  
34 766 42. Van Es SL, Kumar RK, Pryor WM, et al. Cytopathology whole slide images and adaptive  
35 767 tutorials for senior medical students: a randomized crossover trial. *Diagn Pathol*  
36 768 2016;11:1. doi: 10.1186/s13000-016-0452-z [published Online First: 2016/01/10]  
37  
38  
39 769 43. Wong V, Smith AJ, Hawkins NJ, et al. Adaptive Tutorials Versus Web-Based Resources in  
40 770 Radiology: A Mixed Methods Comparison of Efficacy and Student Engagement. *Acad*  
41 771 *Radiol* 2015;22(10):1299-307. doi: 10.1016/j.acra.2015.07.002 [published Online First:  
42 772 2015/08/22]  
43  
44 773 44. Lee BC, Ruiz-Cordell KD, Haimowitz SM, et al. Personalized, assessment-based, and tiered  
45 774 medical education curriculum integrating treatment guidelines for atrial fibrillation.  
46 775 *Clinical cardiology* 2017;40(7):455-60. doi: 10.1002/clc.22676  
47  
48  
49 776 45. Cook DA, Beckman TJ, Thomas KG, et al. Adapting web-based instruction to residents'  
50 777 knowledge improves learning efficiency: a randomized controlled trial. *J Gen Intern Med*  
51 778 2008;23(7):985-90. doi: 10.1007/s11606-008-0541-0 [published Online First:  
52 779 2008/07/10]  
53  
54 780 46. Romito BT, Krasne S, Kellman PJ, et al. The impact of a perceptual and adaptive learning  
55 781 module on transoesophageal echocardiography interpretation by anaesthesiology  
56  
57  
58  
59  
60

- 1  
2  
3 782 residents. *Br J Anaesth* 2016;117(4):477-81. doi: 10.1093/bja/aew295 [published Online  
4 783 First: 2017/01/13]  
5
- 6 784 47. Van Es SL, Kumar RK, Pryor WM, et al. Cytopathology whole slide images and adaptive  
7 785 tutorials for postgraduate pathology trainees: a randomized crossover trial. *Hum Pathol*  
8 786 2015;46(9):1297-305. doi: 10.1016/j.humphath.2015.05.009 [published Online First:  
9 787 2015/06/22]  
10
- 11  
12 788 48. Micheel CM, Anderson IA, Lee P, et al. Internet-Based Assessment of Oncology Health Care  
13 789 Professional Learning Style and Optimization of Materials for Web-Based Learning:  
14 790 Controlled Trial With Concealed Allocation. *J Med Internet Res* 2017;19(7):e265. doi:  
15 791 10.2196/jmir.7506 [published Online First: 2017/07/27]  
16
- 17  
18 792 49. Morente L, Morales-Asencio JM, Veredas F. Effectiveness of an e-learning tool for education  
19 793 on pressure ulcer evaluation. International Conference on Health Informatics. Barcelona,  
20 794 Spain, 2013:155-60.  
21
- 22 795 50. de Ruijter D, Candel M, Smit ES, et al. The Effectiveness of a Computer-Tailored E-Learning  
23 796 Program for Practice Nurses to Improve Their Adherence to Smoking Cessation  
24 797 Counseling Guidelines: Randomized Controlled Trial. *Journal of Medical Internet*  
25 798 *Research* 2018;20(5) doi: 10.2196/jmir.9276  
26
- 27  
28 799 51. Adaptive Perceptual Learning in Electrocardiography: The Synergy of Passive and Active  
29 800 Classification. 37th Annual Conference of the Cognitive Science Society; 2015;  
30 801 Pasadena, CA.  
31
- 32 802 52. Wong MS, Krasne S. Use of a Perceptual Adaptive Learning Module Results in Improved  
33 803 Accuracy and Fluency of Fetal Heart Rate Categorization by Medical Students. *American*  
34 804 *Journal of Obstetrics & Gynecology* 2017;216(1):S491-S92. doi:  
35 805 10.1016/j.ajog.2016.11.768  
36
- 37  
38 806 53. Corbett A, Kauffman L, Maclaren B, et al. A Cognitive Tutor for genetics problem solving:  
39 807 Learning gains and student modeling. *Journal of Educational Computing Research*  
40 808 2010;42(2):219-39. doi: 10.2190/EC.42.2.e  
41
- 42 809 54. Crowley RS, Legowski E, Medvedeva O, et al. Evaluation of an intelligent tutoring system in  
43 810 pathology: Effects of external representation on performance gains, metacognition, and  
44 811 acceptance. *Journal of the American Medical Informatics Association* 2007;14(2):182-90.  
45 812 doi: 10.1197/jamia.M2241  
46
- 47  
48 813 55. Feyzi-Behnagh R, Azevedo R, Legowski E, et al. Metacognitive scaffolds improve self-  
49 814 judgments of accuracy in a medical intelligent tutoring system. *Instructional Science*  
50 815 2014;42(2):159-81. doi: 10.1007/s11251-013-9275-4  
51
- 52 816 56. Romito BT, Krasne S, Kellman PJ, et al. The impact of a perceptual and adaptive learning  
53 817 module on transoesophageal echocardiography interpretation by anaesthesiology  
54 818 residents. *BJA: The British Journal of Anaesthesia* 2016;117(4):477-81. doi:  
55 819 10.1093/bja/aew295  
56  
57  
58  
59  
60

- 1  
2  
3 820 57. Cook, Beckman TJ, Thomas KG, et al. Adapting web-based instruction to residents'  
4 821 knowledge improves learning efficiency. *Journal of General Internal Medicine*  
5 822 2008;23(7):985-90. doi: 10.1007/s11606-008-0541-0  
6  
7 823 58. El Saadawi GM, Tseytlin E, Legowski E, et al. A natural language intelligent tutoring system  
8 824 for training pathologists: Implementation and evaluation. *Advances in health sciences*  
9 825 *education : theory and practice* 2008;13(5):709-22. doi: 10.1007/s10459-007-9081-3  
10 826 [published Online First: 2007/10/16]  
11  
12  
13 827 59. Cohen J. Statistical power analysis for the behavioral sciences. Hillsdale, NJ: L. Erlbaum  
14 828 Associates 1988.  
15  
16 829 60. Cook DA, Hatala R, Brydges R, et al. Technology-enhanced simulation for health professions  
17 830 education. *Journal of the American Medical Association* 2011;306(9):978-88. doi:  
18 831 10.1001/jama.2011.1234  
19  
20  
21 832 61. Liu Q, Peng W, Zhang F, et al. The effectiveness of blended learning in health professions:  
22 833 systematic review and meta-analysis. *Journal of Medical Internet Research*  
23 834 2016;18(1):e2. doi: 10.2196/jmir.4807  
24  
25 835 62. Paas F, Renkl A, Sweller J. Cognitive load theory and instructional design: Recent  
26 836 developments. *Educational Psychologist* 2003;38(1):1-4. doi:  
27 837 10.1207/S15326985EP3801\_1  
28  
29 838 63. Sweller J. Cognitive load during problem solving: Effects on learning. *Cognitive Science*  
30 839 1988;12(2):257-85. doi: 10.1207/s15516709cog1202\_4  
31  
32  
33 840

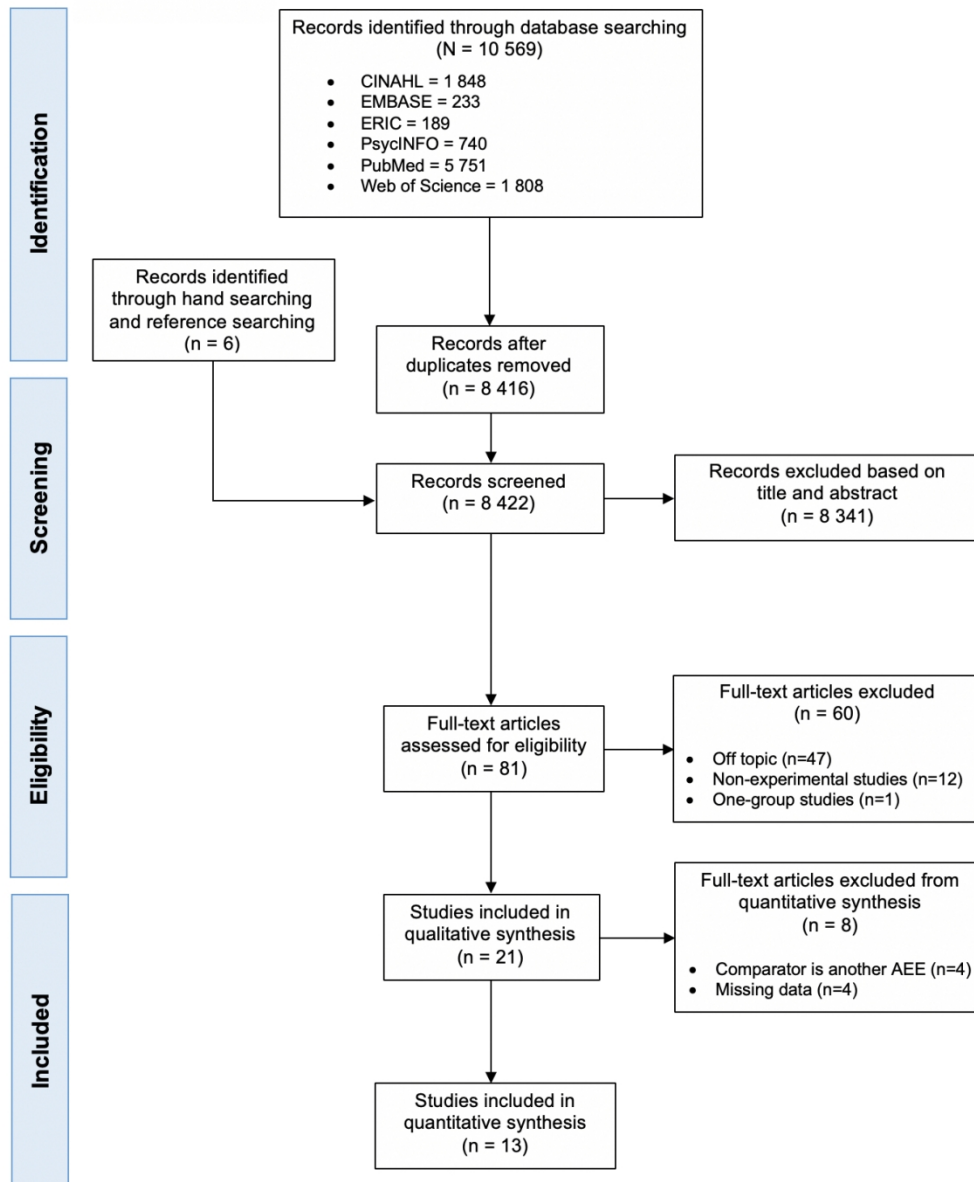

Figure 1. PRISMA study flow diagram.

242x292mm (144 x 144 DPI)

|                    | Random sequence generation (selection bias) | Allocation concealment (selection bias) | Similarity of baseline outcome measurements | Similarity of baseline characteristics | Blinding of participants and personnel (performance) | Blinding of outcome assessment (detection bias) | Incomplete outcome data (attrition bias) | Selective reporting (reporting bias) | Measures against contamination? |
|--------------------|---------------------------------------------|-----------------------------------------|---------------------------------------------|----------------------------------------|------------------------------------------------------|-------------------------------------------------|------------------------------------------|--------------------------------------|---------------------------------|
| Casebeer 2003      | ?                                           | ?                                       | ?                                           | +                                      | ?                                                    | +                                               | ?                                        | ?                                    | +                               |
| Cook 2008          | +                                           | +                                       | ?                                           | +                                      | ?                                                    | +                                               | +                                        | +                                    | +                               |
| Crowley 2007       | ?                                           | ?                                       | +                                           | ?                                      | ?                                                    | +                                               | ?                                        | +                                    | +                               |
| Crowley 2010       | ?                                           | ?                                       | +                                           | +                                      | ?                                                    | +                                               | +                                        | +                                    | +                               |
| de Ruijter 2018    | +                                           | +                                       | +                                           | +                                      | ?                                                    | +                                               | +                                        | +                                    | +                               |
| El Saadawi 2008    | ?                                           | ?                                       | +                                           | +                                      | ?                                                    | +                                               | ?                                        | +                                    | +                               |
| El Saadawi 2010    | ?                                           | ?                                       | +                                           | +                                      | ?                                                    | +                                               | ?                                        | +                                    | +                               |
| Feyzi-Behnagh 2014 | ?                                           | ?                                       | +                                           | +                                      | ?                                                    | +                                               | +                                        | +                                    | +                               |
| Hayes-Roth 2010    | ?                                           | ?                                       | +                                           | +                                      | ?                                                    | +                                               | +                                        | +                                    | +                               |
| Lee 2017           | +                                           | +                                       | +                                           | +                                      | ?                                                    | ?                                               | ?                                        | +                                    | +                               |
| Micheel 2017       | +                                           | +                                       | +                                           | +                                      | ?                                                    | +                                               | +                                        | +                                    | +                               |
| Morente 2013       | +                                           | ?                                       | +                                           | +                                      | ?                                                    | +                                               | +                                        | +                                    | +                               |
| Munoz 2010         | +                                           | +                                       | +                                           | +                                      | ?                                                    | +                                               | ?                                        | +                                    | +                               |
| Romito 2016        | +                                           | +                                       | +                                           | ?                                      | +                                                    | +                                               | +                                        | +                                    | +                               |
| Samulski 2017      | +                                           | ?                                       | +                                           | +                                      | ?                                                    | +                                               | ?                                        | +                                    | +                               |
| Thai 2015          | ?                                           | ?                                       | +                                           | +                                      | ?                                                    | +                                               | ?                                        | +                                    | +                               |
| Van Es 2015        | ?                                           | ?                                       | +                                           | +                                      | ?                                                    | +                                               | +                                        | +                                    | +                               |
| Van Es 2016        | ?                                           | ?                                       | +                                           | +                                      | ?                                                    | +                                               | +                                        | +                                    | +                               |
| Wong 2015          | ?                                           | ?                                       | ?                                           | +                                      | ?                                                    | +                                               | +                                        | ?                                    | +                               |
| Wong 2017          | +                                           | ?                                       | +                                           | +                                      | ?                                                    | +                                               | ?                                        | +                                    | +                               |
| Woo 2006           | ?                                           | ?                                       | +                                           | +                                      | ?                                                    | ?                                               | +                                        | +                                    | +                               |

Figure 2. Risk of bias summary: review authors' judgements about each risk of bias item for each included study.

143x334mm (144 x 144 DPI)



1  
2  
3  
4  
5  
6  
7  
8  
9  
10  
11  
12  
13  
14  
15  
16  
17  
18  
19  
20  
21  
22  
23  
24  
25  
26  
27  
28  
29  
30  
31  
32  
33  
34  
35  
36  
37  
38  
39  
40  
41  
42  
43  
44  
45  
46  
47  
48  
49  
50  
51  
52  
53  
54  
55  
56  
57  
58  
59  
60

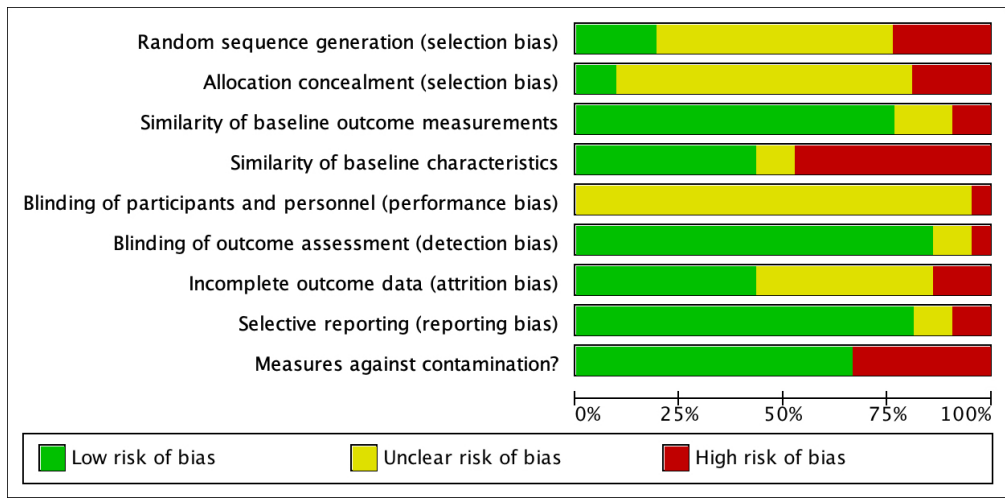

Figure 3. Risk of bias graph: review authors' judgements about each risk of bias item presented as percentages across all included studies.

219x107mm (144 x 144 DPI)

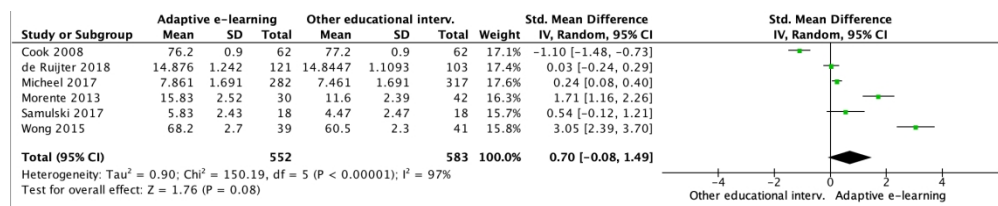

Figure 4. Forest plot representing the meta-analysis of the efficacy of adaptive e-learning versus other educational interventions in improving knowledge.

367x74mm (144 x 144 DPI)

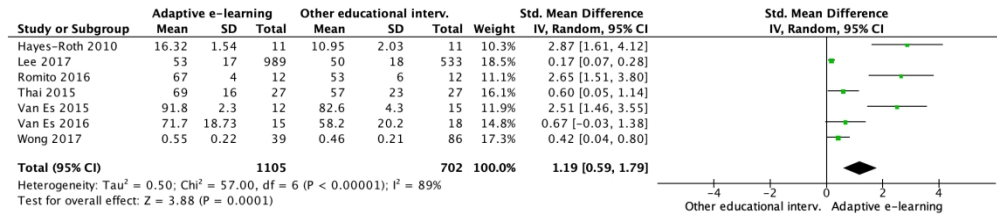

Figure 5. Forest plot representing the meta-analysis of the efficacy of adaptive e-learning versus other educational interventions in improving skills.

365x79mm (144 x 144 DPI)



# PRISMA 2009 Checklist

| Section/topic                      | #  | Checklist item                                                                                                                                                                                                                                                                                              | Reported on page #   |
|------------------------------------|----|-------------------------------------------------------------------------------------------------------------------------------------------------------------------------------------------------------------------------------------------------------------------------------------------------------------|----------------------|
| <b>TITLE</b>                       |    |                                                                                                                                                                                                                                                                                                             |                      |
| Title                              | 1  | Identify the report as a systematic review, meta-analysis, or both.                                                                                                                                                                                                                                         | 1                    |
| <b>ABSTRACT</b>                    |    |                                                                                                                                                                                                                                                                                                             |                      |
| Structured summary                 | 2  | Provide a structured summary including, as applicable: background; objectives; data sources; study eligibility criteria, participants, and interventions; study appraisal and synthesis methods; results; limitations; conclusions and implications of key findings; systematic review registration number. | 4-5                  |
| <b>INTRODUCTION</b>                |    |                                                                                                                                                                                                                                                                                                             |                      |
| Rationale                          | 3  | Describe the rationale for the review in the context of what is already known.                                                                                                                                                                                                                              | 7-9                  |
| Objectives                         | 4  | Provide an explicit statement of questions being addressed with reference to participants, interventions, comparisons, outcomes, and study design (PICOS).                                                                                                                                                  | 9-10                 |
| <b>METHODS</b>                     |    |                                                                                                                                                                                                                                                                                                             |                      |
| Protocol and registration          | 5  | Indicate if a review protocol exists, if and where it can be accessed (e.g., Web address), and, if available, provide registration information including registration number.                                                                                                                               | 10                   |
| Eligibility criteria               | 6  | Specify study characteristics (e.g., PICOS, length of follow-up) and report characteristics (e.g., years considered, language, publication status) used as criteria for eligibility, giving rationale.                                                                                                      | 10-11                |
| Information sources                | 7  | Describe all information sources (e.g., databases with dates of coverage, contact with study authors to identify additional studies) in the search and date last searched.                                                                                                                                  | 11-12                |
| Search                             | 8  | Present full electronic search strategy for at least one database, including any limits used, such that it could be repeated.                                                                                                                                                                               | Supplementary File 2 |
| Study selection                    | 9  | State the process for selecting studies (i.e., screening, eligibility, included in systematic review, and, if applicable, included in the meta-analysis).                                                                                                                                                   | 11-12                |
| Data collection process            | 10 | Describe method of data extraction from reports (e.g., piloted forms, independently, in duplicate) and any processes for obtaining and confirming data from investigators.                                                                                                                                  | 11-12                |
| Data items                         | 11 | List and define all variables for which data were sought (e.g., PICOS, funding sources) and any assumptions and simplifications made.                                                                                                                                                                       | 12-13                |
| Risk of bias in individual studies | 12 | Describe methods used for assessing risk of bias of individual studies (including specification of whether this was done at the study or outcome level), and how this information is to be used in any data synthesis.                                                                                      | 13                   |
| Summary measures                   | 13 | State the principal summary measures (e.g., risk ratio, difference in means).                                                                                                                                                                                                                               | 13-14                |
| Synthesis of results               | 14 | Describe the methods of handling data and combining results of studies, if done, including measures of consistency (e.g., $I^2$ ) for each meta-analysis.                                                                                                                                                   | 13-14                |

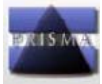

# PRISMA 2009 Checklist

| Section/topic                 | #  | Checklist item                                                                                                                                                                                           | Reported on page # |
|-------------------------------|----|----------------------------------------------------------------------------------------------------------------------------------------------------------------------------------------------------------|--------------------|
| Risk of bias across studies   | 15 | Specify any assessment of risk of bias that may affect the cumulative evidence (e.g., publication bias, selective reporting within studies).                                                             | 13                 |
| Additional analyses           | 16 | Describe methods of additional analyses (e.g., sensitivity or subgroup analyses, meta-regression), if done, indicating which were pre-specified.                                                         | 14                 |
| <b>RESULTS</b>                |    |                                                                                                                                                                                                          |                    |
| Study selection               | 17 | Give numbers of studies screened, assessed for eligibility, and included in the review, with reasons for exclusions at each stage, ideally with a flow diagram.                                          | 15                 |
| Study characteristics         | 18 | For each study, present characteristics for which data were extracted (e.g., study size, PICOS, follow-up period) and provide the citations.                                                             | 18                 |
| Risk of bias within studies   | 19 | Present data on risk of bias of each study and, if available, any outcome level assessment (see item 12).                                                                                                | 29-30              |
| Results of individual studies | 20 | For all outcomes considered (benefits or harms), present, for each study: (a) simple summary data for each intervention group (b) effect estimates and confidence intervals, ideally with a forest plot. | 32-33              |
| Synthesis of results          | 21 | Present results of each meta-analysis done, including confidence intervals and measures of consistency.                                                                                                  | 32-33              |
| Risk of bias across studies   | 22 | Present results of any assessment of risk of bias across studies (see Item 15).                                                                                                                          | 31                 |
| Additional analysis           | 23 | Give results of additional analyses, if done (e.g., sensitivity or subgroup analyses, meta-regression [see Item 16]).                                                                                    | N/A                |
| <b>DISCUSSION</b>             |    |                                                                                                                                                                                                          |                    |
| Summary of evidence           | 24 | Summarize the main findings including the strength of evidence for each main outcome; consider their relevance to key groups (e.g., healthcare providers, users, and policy makers).                     | 32-33              |
| Limitations                   | 25 | Discuss limitations at study and outcome level (e.g., risk of bias), and at review-level (e.g., incomplete retrieval of identified research, reporting bias).                                            | 39                 |
| Conclusions                   | 26 | Provide a general interpretation of the results in the context of other evidence, and implications for future research.                                                                                  | 36-39              |
| <b>FUNDING</b>                |    |                                                                                                                                                                                                          |                    |
| Funding                       | 27 | Describe sources of funding for the systematic review and other support (e.g., supply of data); role of funders for the systematic review.                                                               | 41                 |

From: Moher D, Liberati A, Tetzlaff J, Altman DG, The PRISMA Group (2009). Preferred Reporting Items for Systematic Reviews and Meta-Analyses: The PRISMA Statement. PLoS Med 6(7): e1000097. doi:10.1371/journal.pmed1000097

For more information, visit: [www.prisma-statement.org](http://www.prisma-statement.org).

## Supplementary File 2 – Search Strategy for PubMed

**PubMed – 17 avril 2017**

1. ((Adaptive[TIAB] OR individualized [TIAB] OR personalized[TIAB] OR Tailored[TIAB]) AND (elearning[TIAB] OR learning[TIAB] OR Instruction[TIAB] OR "web-based instruction"[TIAB] OR computer-based instruction[TIAB] OR computer-based tutoring[TIAB] OR education[TIAB] OR tutorial[TIAB] OR tutorials[TIAB])) OR Intelligent tutoring system[TIAB] OR Intelligent tutoring systems[TIAB]
2. "Computer-Assisted Instruction"[MH]
3. #1 OR #2
4. Health Personnel\*[TIAB] OR Health professional\*[TIAB] OR Health care profession\*[TIAB] OR Healthcare profession\*[TIAB] OR Medical student\*[TIAB] OR Medical assistant\*[TIAB] OR health worker\*[TIAB] OR Audiologist\*[TIAB] OR Chiropractor\*[TIAB] OR Dentist[TIAB] OR Dentists[TIAB] OR Dietitian\*[TIAB] OR Dermatolog\*[TIAB] OR endocrinologist\*[TIAB] OR Gastroenterolog\*[TIAB] OR Gynecolog\*[TIAB] OR Radiolog\*[TIAB] OR Medical Staff[TIAB] OR Midwife\*[TIAB] OR nutritionist\*[TIAB] OR Nurse[TIAB] OR Nurses[TIAB] OR Optometrist\*[TIAB] OR Occupational Therapist\*[TIAB] OR Patholog\*[TIAB] OR Paramedic[TIAB] OR Paediatric[TIAB] OR pediatrician\*[TIAB] OR Paediatrician\*[TIAB] OR pediatricist\*[TIAB] OR pediatric[TIAB] OR Pharmacist\*[TIAB] OR Pharmaconomist\*[TIAB] OR Pharmacologist\*[TIAB] OR Pharmacy technician\*[TIAB] OR Phlebotomist\*[TIAB] OR Physician OR Podiatrist\*[TIAB] OR Psychologist\*[TIAB] OR Psychotherapist\*[TIAB] OR psychiatrist\*[TIAB] OR Physical therapist\*[TIAB] OR physiotherapist\*[TIAB] OR Respiratory therapist\*[TIAB] OR Surgeon\*[TIAB] OR Clinician\*[TIAB] OR Cardiologist\*[TIAB] OR Emergency medical technician\*[TIAB] OR emergency doctor\*[TIAB] OR emergentologist\*[TIAB] OR clinical officer\*[TIAB] OR Community health worker\*[TIAB] OR Radiographer\*[TIAB] OR Surgical technologist\*[TIAB] OR Radiotherapist\*[TIAB] OR Anesthetist\*[TIAB] OR Resident[TIAB] OR residents[TIAB]
5. "Health Personnel"[MH] OR "Students, Premedical"[MH] OR "Students, Medical"[MH] OR "Students, Nursing"[Mesh]
6. "Education, Premedical"[MH] OR "Education, Medical"[MH] OR "Education, Nursing"[MH] OR "Education, Pharmacy"[MH] OR "Education, Public Health Professional"[MH] OR "Clinical Clerkship"[MH]
7. #4 OR #5 OR 6
8. knowledge\*[TIAB] OR Aptitude\*[TIAB] OR accuracy[TIAB] OR impact\*[TIAB] OR skill\*[TIAB] OR performance\*[TIAB] OR Learning outcome\*[TIAB] OR effectiveness[TIAB] OR efficacy[TIAB] OR improvement\*[TIAB] OR Innovative\*[TIAB] OR innovation\*[TIAB] OR randomised controlled trial[TIAB] OR randomized controlled trial[TIAB]
9. "Clinical Competence"[MH] "Quality Improvement"[MH] OR "Learning Curve"[MH] OR Knowledge [MH] OR "randomized controlled trial"[PT]
10. #8 OR 9
11. #3 AND #7 AND #10
12. (english[LA] OR french[LA]) AND 2005:2017[DP]
13. #11 AND #12

**Résultats: 4 375**

Supplementary File 3 – Summary of the quality of evidence

| Certainty assessment |                   |                      |                      |              |                      |                      | No of patients                                   |                                 | Effect            |                                                    | Certainty        | Importance |
|----------------------|-------------------|----------------------|----------------------|--------------|----------------------|----------------------|--------------------------------------------------|---------------------------------|-------------------|----------------------------------------------------|------------------|------------|
| No of studies        | Study design      | Risk of bias         | Inconsistency        | Indirectness | Imprecision          | Other considerations | adaptive and intelligent e-learning environments | other educational interventions | Relative (95% CI) | Absolute (95% CI)                                  |                  |            |
| <b>Knowledge</b>     |                   |                      |                      |              |                      |                      |                                                  |                                 |                   |                                                    |                  |            |
| 6                    | randomised trials | serious <sup>a</sup> | serious <sup>b</sup> | not serious  | serious <sup>c</sup> | none                 | 552                                              | 583                             | -                 | SMD 0.7 SD higher<br>(0.08 lower to 1.49 higher)   | ⊕○○○<br>VERY LOW | IMPORTANT  |
| <b>Competence</b>    |                   |                      |                      |              |                      |                      |                                                  |                                 |                   |                                                    |                  |            |
| 7                    | randomised trials | serious <sup>a</sup> | not serious          | not serious  | serious <sup>c</sup> | none                 | 1105                                             | 702                             | -                 | SMD 1.19 SD higher<br>(0.59 higher to 1.79 higher) | ⊕⊕○○<br>LOW      | CRITICAL   |

CI: Confidence interval; SMD: Standardised mean difference

Explanations

- a. Most studies have unclear or high risk of bias with regard to random sequence generation and allocation concealment. The risk of bias for similarity of baseline measurements was unclear for some studies. Thus, groups in these studies could be disproportionate and the distribution may not be normal since sample size is generally small.
- b. Studies yield widely differing estimates of effect (heterogeneity or variability in results). The individual confidence intervals of some studies almost do not touch.
- c. Most studies include few participants and few events and have wide confidence intervals. Measurement instruments often not validated. Sample size often insufficient.
