# Supplementary material for: Efficacy of adaptive e-learning for health professionals and students: a systematic review and meta-analysis
Source: PubMed Central journal article supplement — BMJ Open. 2019 Aug 28;9(8):e025252. doi: 10.1136/bmjopen-2018-025252 (PMC6719835; doi:10.1136/bmjopen-2018-025252), 2019-08-28
Supplement: bmjopen-2018-025252supp002.pdf [file bmjopen-2018-025252supp002.pdf]

## Supplementary File 2 – Search Strategy for PubMed

**PubMed – 17 avril 2017**

1. ((Adaptive[TIAB] OR individualized [TIAB] OR personalized[TIAB] OR Tailored[TIAB]) AND (elearning[TIAB] OR learning[TIAB] OR Instruction[TIAB] OR "web-based instruction"[TIAB] OR computer-based instruction[TIAB] OR computer-based tutoring[TIAB] OR education[TIAB] OR tutorial[TIAB] OR tutorials[TIAB])) OR Intelligent tutoring system[TIAB] OR Intelligent tutoring systems[TIAB]
2. "Computer-Assisted Instruction"[MH]
3. #1 OR #2
4. Health Personnel\*[TIAB] OR Health professional\*[TIAB] OR Health care profession\*[TIAB] OR Healthcare profession\*[TIAB] OR Medical student\*[TIAB] OR Medical assistant\*[TIAB] OR health worker\*[TIAB] OR Audiologist\*[TIAB] OR Chiropractor\*[TIAB] OR Dentist[TIAB] OR Dentists[TIAB] OR Dietitian\*[TIAB] OR Dermatolog\*[TIAB] OR endocrinologist\*[TIAB] OR Gastroenterolog\*[TIAB]OR Gynecolog\*[TIAB]OR Radiolog\*[TIAB] OR Medical Staff[TIAB] OR Midwife\*[TIAB] OR nutritionist\*[TIAB] OR Nurse[TIAB] OR Nurses[TIAB] OR Optometrist\*[TIAB] OR Occupational Therapist\*[TIAB] OR Patholog\*[TIAB] OR Paramedic[TIAB] OR Paediatric[TIAB] OR pediatrician\*[TIAB] OR Paediatrician\*[TIAB] OR pediatricist\*[TIAB] OR pediatric[TIAB] OR Pharmacist\*[TIAB] OR Pharmaconomist\*[TIAB] OR Pharmacologist\*[TIAB] OR Pharmacy technician\*[TIAB] OR Phlebotomist\*[TIAB] OR Physician OR Podiatrist\*[TIAB] OR Psychologist\*[TIAB] OR Psychotherapist\*[TIAB] OR psychiatrist\*[TIAB] OR Physical therapist\*[TIAB] OR physiotherapist\*[TIAB] OR Respiratory therapist\*[TIAB] OR Surgeon\*[TIAB] OR Clinician\*[TIAB] OR Cardiologist\*[TIAB] OR Emergency medical technician\*[TIAB] OR emergency doctor\*[TIAB] OR emergentologist\*[TIAB] OR clinical officer\*[TIAB] OR Community health worker\*[TIAB] OR Radiographer\*[TIAB] OR Surgical technologist\*[TIAB] OR Radiotherapist\*[TIAB] OR Anesthetist\*[TIAB] OR Resident[TIAB] OR residents[TIAB]
5. "Health Personnel"[MH] OR "Students, Premedical"[MH] OR "Students, Medical"[MH] OR "Students, Nursing"[Mesh]
6. "Education, Premedical"[MH] OR "Education, Medical"[MH] OR "Education, Nursing"[MH] OR "Education, Pharmacy"[MH] OR "Education, Public Health Professional"[MH] OR "Clinical Clerkship"[MH]
7. #4 OR #5 OR 6
8. knowledge\*[TIAB] OR Aptitude\*[TIAB] OR accuracy[TIAB] OR impact\*[TIAB] OR skill\*[TIAB] OR performance\*[TIAB] OR Learning outcome\*[TIAB] OR effectiveness[TIAB] OR efficacy[TIAB] OR improvement\*[TIAB] OR Innovative\*[TIAB] OR innovation\*[TIAB] OR randomised controlled trial[TIAB] OR randomized controlled trial[TIAB]
9. "Clinical Competence"[MH] "Quality Improvement"[MH] OR "Learning Curve"[MH] OR Knowledge [MH] OR "randomized controlled trial"[PT]
10. #8 OR 9
11. #3 AND #7 AND #10
12. (english[LA] OR french[LA]) AND 2005:2017[DP]
13. #11 AND #12

**Résultats: 4 375**
