# Supplementary material for: Efficacy of adaptive e-learning for health professionals and students: a systematic review and meta-analysis
Source: PubMed Central journal article supplement — BMJ Open. 2019 Aug 28;9(8):e025252. doi: 10.1136/bmjopen-2018-025252 (PMC6719835; doi:10.1136/bmjopen-2018-025252), 2019-08-28
Supplement: bmjopen-2018-025252supp003.pdf [file bmjopen-2018-025252supp003.pdf]

## Supplementary File 3 – Summary of the quality of evidence

| Certainty assessment      |                   |                      |                      |              |                      |                      | N <sup>o</sup> of patients                       |                                 | Effect            |                                                    | Certainty        | Importance |
|---------------------------|-------------------|----------------------|----------------------|--------------|----------------------|----------------------|--------------------------------------------------|---------------------------------|-------------------|----------------------------------------------------|------------------|------------|
| N <sup>o</sup> of studies | Study design      | Risk of bias         | Inconsistency        | Indirectness | Imprecision          | Other considerations | adaptive and intelligent e-learning environments | other educational interventions | Relative (95% CI) | Absolute (95% CI)                                  |                  |            |
| <b>Knowledge</b>          |                   |                      |                      |              |                      |                      |                                                  |                                 |                   |                                                    |                  |            |
| 6                         | randomised trials | serious <sup>a</sup> | serious <sup>b</sup> | not serious  | serious <sup>c</sup> | none                 | 552                                              | 583                             | -                 | SMD 0.7 SD higher<br>(0.08 lower to 1.49 higher)   | ⊕○○○<br>VERY LOW | IMPORTANT  |
| <b>Competence</b>         |                   |                      |                      |              |                      |                      |                                                  |                                 |                   |                                                    |                  |            |
| 7                         | randomised trials | serious <sup>a</sup> | not serious          | not serious  | serious <sup>c</sup> | none                 | 1105                                             | 702                             | -                 | SMD 1.19 SD higher<br>(0.59 higher to 1.79 higher) | ⊕⊕○○<br>LOW      | CRITICAL   |

CI: Confidence interval; SMD: Standardised mean difference

## Explanations

- a. Most studies have unclear or high risk of bias with regard to random sequence generation and allocation concealment. The risk of bias for similarity of baseline measurements was unclear for some studies. Thus, groups in these studies could be disproportionate and the distribution may not be normal since sample size is generally small.
- b. Studies yield widely differing estimates of effect (heterogeneity or variability in results). The individual confidence intervals of some studies almost do not touch.
- c. Most studies include few participants and few events and have wide confidence intervals. Measurement instruments often not validated. Sample size often insufficient.
